# Supplementary material for: Emergency and urgent care capacity in a resource-limited setting: an assessment of health facilities in western Kenya
Source: PubMed Central journal article supplement — BMJ Open. 2014 Sep 25;4(9):e006132. doi: 10.1136/bmjopen-2014-006132 (PMC4179582; doi:10.1136/bmjopen-2014-006132), 2014-09-25
Supplement: bmjopen-2014-006132.draft_revisions.pdf [file bmjopen-2014-006132.draft_revisions.pdf]

# BMJ Open

## Emergency and urgent care capacity: an assessment of health facilities in western Kenya

|                                 |                                                                                                                                                                                                                                                                                                                                                                                                                                                                                                                                                                                                                                                                                                                                                                                                                       |
|---------------------------------|-----------------------------------------------------------------------------------------------------------------------------------------------------------------------------------------------------------------------------------------------------------------------------------------------------------------------------------------------------------------------------------------------------------------------------------------------------------------------------------------------------------------------------------------------------------------------------------------------------------------------------------------------------------------------------------------------------------------------------------------------------------------------------------------------------------------------|
| Journal:                        | <i>BMJ Open</i>                                                                                                                                                                                                                                                                                                                                                                                                                                                                                                                                                                                                                                                                                                                                                                                                       |
| Manuscript ID:                  | bmjopen-2014-006132                                                                                                                                                                                                                                                                                                                                                                                                                                                                                                                                                                                                                                                                                                                                                                                                   |
| Article Type:                   | Research                                                                                                                                                                                                                                                                                                                                                                                                                                                                                                                                                                                                                                                                                                                                                                                                              |
| Date Submitted by the Author:   | 16-Jul-2014                                                                                                                                                                                                                                                                                                                                                                                                                                                                                                                                                                                                                                                                                                                                                                                                           |
| Complete List of Authors:       | Burke, Thomas; Massachusetts General Hospital, Department of Emergency Medicine<br>Hines, Rosemary; Massachusetts General Hospital, Department of Emergency Medicine<br>Ahn, Roy; Massachusetts General Hospital, Department of Emergency Medicine<br>Walters, Michelle; Massachusetts General Hospital, Department of Emergency Medicine<br>Young, David; Massachusetts General Hospital, Department of Emergency Medicine<br>Anderson, Rachel; Massachusetts General Hospital, Department of Emergency Medicine<br>Tom, Sabrina; Massachusetts General Hospital, Department of Emergency Medicine<br>Clark, Rachel; Massachusetts General Hospital, Department of Emergency Medicine<br>Obita, Walter; Sagam Community Hospital,<br>Nelson, Brett; Massachusetts General Hospital, Department of Emergency Medicine |
| <b>Primary Subject Heading</b>: | Emergency medicine                                                                                                                                                                                                                                                                                                                                                                                                                                                                                                                                                                                                                                                                                                                                                                                                    |
| Secondary Subject Heading:      | Global health                                                                                                                                                                                                                                                                                                                                                                                                                                                                                                                                                                                                                                                                                                                                                                                                         |
| Keywords:                       | ACCIDENT & EMERGENCY MEDICINE, International health services < HEALTH SERVICES ADMINISTRATION & MANAGEMENT, TRAUMA MANAGEMENT                                                                                                                                                                                                                                                                                                                                                                                                                                                                                                                                                                                                                                                                                         |
|                                 |                                                                                                                                                                                                                                                                                                                                                                                                                                                                                                                                                                                                                                                                                                                                                                                                                       |

SCHOLARONE™  
Manuscripts

1  
2  
3 **Emergency and urgent care capacity in a resource-limited setting: an assessment of health**  
4  
5 **facilities in western Kenya**  
6  
7

8  
9  
10  
11 **Authors and affiliations**  
12

13 Thomas F. Burke, MD <sup>a, b, c</sup>  
14

15 Rosemary Hines <sup>a</sup>  
16

17 Roy Ahn, MPH, ScD <sup>a, b, c</sup>  
18

19 Michelle Walters <sup>a</sup>  
20

21 David Young, MD <sup>a</sup>  
22

23 Rachel Eleanor Anderson, MD <sup>a</sup>  
24

25 Sabrina Tom, MD <sup>a</sup>  
26

27 Rachel Clark <sup>a</sup>  
28

29 Walter Obita, MD <sup>c</sup>  
30

31 Brett D. Nelson, MD, MPH <sup>a, b, c</sup>  
32  
33  
34  
35

36  
37  
38  
39  
40  
41 a. Division of Global Health and Human Rights, Department of Emergency Medicine,  
42  
43 Massachusetts General Hospital, Zero Emerson Place, Suite 104, Boston, MA 02114, USA  
44

45  
46 b. Harvard Medical School, 25 Shattuck St, Boston, MA 02115, USA  
47

48  
49 c. Sagam Community Hospital, Siaya Road, Luanda 50307, Kenya  
50

51  
52  
53 **Corresponding author:**  
54

55  
56 Thomas F. Burke, MD, FACEP, FRSM  
57  
58  
59  
60

1  
2  
3 Division of Global Health and Human Rights, Massachusetts General Hospital

4  
5  
6 Zero Emerson Place, Suite 104, Boston, MA 02114, USA

7  
8 E-mail [tfburke@partners.org](mailto:tfburke@partners.org)

9  
10  
11 Phone +1-617-584-0064

12  
13  
14  
15  
16 **Word count:**

17  
18 2,919 words

19  
20  
21  
22  
23 **Keywords:**

24  
25  
26 Emergency medicine

27  
28 Urgent care

29  
30  
31 Capacity assessment

32  
33  
34 Kenya

35  
36  
37 Pre-hospital care

38  
39  
40  
41  
42  
43  
44  
45  
46  
47  
48  
49  
50  
51  
52  
53  
54  
55  
56  
57  
58  
59  
60  
For peer review only

## Abstract

**Objective:** Injuries, trauma, and non-communicable diseases are responsible for a rising proportion of death and disability in low- and middle-income countries. Delivering effective emergency and urgent health care for these and other conditions in resource-limited settings is challenging. In this study, we sought to understand emergency and urgent care capacity in a resource-limited setting.

**Methods:** We conducted an assessment in western Kenya within all 30 primary and secondary hospitals and within a stratified random sampling of 30 dispensaries and health centers. Key informants were the most senior facility health care provider and manager available. Emergency physician researchers utilized a semi-structured assessment tool, and data were analyzed using descriptive statistics and thematic coding.

**Results:** No lower-level facilities and 30% of higher-level facilities reported having a defined, organized approach to trauma. Forty-three percent of higher-level facilities have access to an anesthetist. The majority of lower-level facilities have suture and wound care supplies and gloves but typically lack other basic trauma supplies. For cardiac care, 50% of higher-level facilities have morphine, but a minority have functioning ECG, sublingual nitroglycerin, or defibrillator. Only 20% of lower-level facilities have glucometers, and only 33% of higher-level facilities can care for diabetic emergencies. No facilities have sepsis clinical guidelines.

**Conclusions:** Large gaps in essential emergency care capabilities were identified at all facility levels in western Kenya. There is great opportunity for a universally deployed basic emergency care package, advanced emergency care package and facility designation scheme, and reliable pre-hospital care transportation and communications system for resource-limited settings.

**Strengths and limitations of this study:**

- This assessment was completed within all 30 primary and secondary hospitals and a stratified random sampling of 30 dispensaries and health centers in western Kenya
- Semi-structured interviews were conducted among facility leadership to understand emergency and urgent care capacity in this resource-limited setting
- Large gaps at all facility levels were identified in essential care capabilities
- There is great opportunity for a universally deployed basic emergency care package, advanced emergency care package and facility designation scheme, and reliable pre-hospital care transportation and communications system for resource-limited settings.
- The study may not be generalizable outside of this region.

## Introduction

### *Background and importance*

Providing effective emergency and urgent care is a considerable challenge in low- and middle-income countries. Difficulties exist with regard to transportation, communications, equipment, facility infrastructure, medication supply lines, affordability, and availability of skilled health care providers. Historically, infections caused by communicable diseases have been the major contributors to morbidity and mortality in resource-limited settings. However, traumatic injuries and non-communicable diseases (NCDs), such as heart disease and cancer, are rising rapidly and have recently become recognized as significant contributors to the burden of disease in developing countries. Eighty percent of all NCD deaths in 2008 (29 million) occurred in low- and middle-income countries, with cardiovascular disease, cancers, and respiratory disease the leading causes.<sup>1</sup> Furthermore, 16,000 people die globally each day from injuries alone, accounting for over 15% of the global burden of disease. Approximately 90% of these injuries occur in low- and middle-income countries.<sup>2-4</sup>

Kenya is facing an epidemic of NCDs and an increasing burden of injury and trauma. Between 2003 and 2008, the proportion of deaths related to trauma in western Kenya increased from 2.5% to 5.9%, with road traffic accidents (RTA) the leading cause.<sup>5</sup> In the past, most Kenya public health programs focused on communicable diseases. As a consequence, Kenya has developed disease-specific clinical guidelines for HIV/AIDS, malaria, tuberculosis, and other communicable diseases, but there are currently no national guidelines for emergency care.<sup>6,7</sup> As rates of NCDs and trauma-related injuries and deaths increase, there is a growing urgency to

1  
2  
3 provide adequate and organized treatment for time-sensitive illnesses and injuries, such as  
4  
5 acute myocardial infarction, stroke, trauma, and sepsis.  
6  
7  
8  
9

10  
11 Recent assessments performed in a select group of facilities in Nigeria, South Africa, and  
12  
13 Tanzania documented emergency and critical care services in terms of resources, routines, and  
14  
15 guidelines, while a small-scale evaluation of public emergency departments in Kenya described  
16  
17 the most common diagnoses of presenting patients.<sup>8-11</sup> No assessment of the emergency care  
18  
19 capabilities across a region in Kenya has ever been published.  
20  
21  
22  
23  
24  
25

### 26 *Goals of this investigation*

27  
28 The Division of Global Health and Human Rights in the Department of Emergency Medicine at  
29  
30 the Massachusetts General Hospital was approached by the Kenyan Ministry of Health and  
31  
32 asked to assess the emergency and urgent health care capabilities across all levels of facilities in  
33  
34 Kisumu and Siaya counties of western Kenya. This paper reports major findings from this  
35  
36 assessment.  
37  
38  
39  
40  
41  
42

### 43 *Health care provision in Kenya*

44  
45 Kenya has 6,626 health facilities across 47 counties, serving a population of over 43 million  
46  
47 people. Kisumu and Siaya counties have populations of 968,909 (52% urban) and 842,304 (11%  
48  
49 urban), respectively.<sup>12,13</sup> There are a total of 150 health facilities in Kisumu (92 public, 15 non-  
50  
51 governmental, 15 faith-based, and 28 private) and a total of 162 health facilities in Siaya (115  
52  
53 public, 7 non-governmental, 17 faith-based, and 23 private). The Kenya Essential Package for  
54  
55  
56  
57  
58  
59  
60

1  
2  
3 Health (KEPH) defines the levels of care in Kenya: Level 1 for community-administered care and  
4  
5 Levels 2-6 for health care facilities (Table 1).<sup>14</sup> Levels 2, 3, 4, 5, and 6 represent dispensaries and  
6  
7  
8 clinics, health centers, primary hospitals, secondary hospitals, and tertiary hospitals,  
9  
10 respectively.  
11

## 12 13 14 15 16 **Methods**

### 17 18 *Study design and setting*

19  
20 This facility-based emergency care capabilities assessment was conducted between November  
21  
22 1, 2013 and January 20, 2014, in Kisumu and Siaya counties in western Kenya. All 30 Level 4 and  
23  
24 5 facilities in the two counties (there are no Level 6 facilities in these counties) were selected  
25  
26 for assessment. Selection of 30 additional facilities occurred via randomized stratified sampling  
27  
28 of each additional type of facility – dispensary, health center, and health clinic. The criterion for  
29  
30 inclusion was a fully functioning health facility; there were no restrictions based on geography  
31  
32 or accessibility.  
33  
34  
35  
36  
37  
38  
39  
40

### 41 42 *Methods and measurements*

43  
44 This facility-based emergency care capabilities assessment utilized semi-structured, key-  
45  
46 informant interviews using a data collection instrument designed by the study authors. The key  
47  
48 informants were the most senior institution staff members identified during the day of the  
49  
50 assessment – typically the chief medical officer and/or senior administrator. The assessment  
51  
52 tool drew from existing models of facility assessment in South Africa, Pakistan, and Tanzania, as  
53  
54 well as the WHO Guidelines for Essential Trauma Care.<sup>9,10,15,16</sup> The assessment tool was refined  
55  
56  
57  
58  
59  
60



1  
2  
3 by expert consultation with the team's emergency physicians and public health epidemiologists,  
4  
5 and covered eight domains: facility demographics, referral services, personnel, economics,  
6  
7 supplies and laboratory, trauma, critical care, and anesthesia. The interviews consisted of open-  
8  
9 response questions related to health care services, most common conditions of patients  
10  
11 presenting for care, provider capabilities, equipment, supplies, and medications. Qualitative  
12  
13 questions pertained to attitudes and perceptions related to provider morale, cooperation and  
14  
15 communication between referring and receiving health facilities, and recommendations for  
16  
17 continuing education and referral services.  
18  
19  
20  
21  
22  
23  
24  
25

26 The key-informant interviews were conducted by our field research team – consisting at all  
27  
28 times of at least one emergency physician and one research assistant. Three different  
29  
30 emergency physicians were involved throughout the data collection process. The delivery of  
31  
32 questions and interview structure were discussed *a priori* by all three physician interviewers in  
33  
34 order to standardize the interview process. Participants were provided an overview of the  
35  
36 project, and the voluntary and confidential nature of the assessment was described. All  
37  
38 participants gave verbal consent prior to participation.  
39  
40  
41  
42  
43  
44  
45

#### 46 *Analysis*

47  
48 Data were analyzed using standard descriptive and frequency analyses, utilizing Microsoft Excel  
49  
50 2007 (Seattle, WA, USA). Qualitative research methods involved thematic analysis of interviews  
51  
52 in order to best understand emergent findings.  
53  
54  
55  
56  
57  
58  
59  
60

### *Ethical review and funding*

This study was reviewed and approved by the Institutional Review Board of Partners Healthcare (Boston, MA, USA) and the Ministry of Health of Kenya. This research received no specific grant from any funding agency in the public, commercial, or not-for-profit sectors.

## **Results**

A key informant at each of the 60 facilities was surveyed between November 1, 2013 and January 20, 2014. The facility sites were a mix of dispensaries/health clinics, health centers, primary hospitals, and secondary hospitals, as shown in Table 2. (There are no tertiary hospitals in Kisumu or Siaya County.) The 60 key informants comprised 10 chief medical officers (all at the hospital level), 39 nurse managers (facility matron), and 11 lead clinical officers.

### ***Level 2 and 3 Facilities***

#### *Common Conditions*

Key informants were asked to list the 10 most common emergent and urgent conditions presenting to their health facility. The most frequently reported conditions at Level 2 and 3 facilities were (in rank order) malaria (30/30, 100%), diarrhea (26/30, 87%), upper respiratory infections (24/30, 80%), skin infections (18/30, 60%), sexually transmitted infections (15/30, 50%), pneumonia (14/30, 47%), and RTAs/trauma (9/30, 30%).

#### *Trauma and Injury*

1  
2  
3 When asked if their Level 2 and 3 facilities have a specific approach to a trauma patient that  
4 differs from how they approach a medical patient, 0% of key informants answered in the  
5 affirmative. In response to how well respondents felt their facility can handle major trauma, all  
6  
7  
8  
9  
10  
11 30 said they refer. Twenty-six (87%) of the 30 said they refer immediately, and four (13%) said  
12  
13 they try to provide first aid then refer. The majority of providers (21/30, 70%) said their facility  
14  
15 is poorly equipped to handle a broken bone.  
16  
17

18  
19  
20  
21 The majority of Level 2 and 3 facilities have suture and wound care supplies (26/30, 87%) and  
22  
23 gloves (27/30, 90%) (Table 3). Few of these facilities have oxygen (7/30, 23%) and  
24  
25 splinting/casting supplies (3/30, 10%), and none have blood for transfusion (0/30, 0%).  
26  
27

### 28 29 30 31 *Critical Care*

32  
33 When asked about the standard procedure for treating someone with a possible heart attack,  
34  
35 all 30 providers at Level 2 and 3 facilities reported that their facility refers. Eighteen (60%) of  
36  
37 the 30 reported referring patients immediately, eight (27%) said they treat symptoms (e.g.,  
38  
39 painkillers, oxygen) and then refer, and four (13%) said they check vitals and then refer. Of the  
40  
41  
42  
43 30 Level 2 and 3 facilities, one has sublingual nitroglycerin.  
44

45  
46 The majority of providers (29/30, 93%) at the lower-level facilities said that their facility is ill-  
47  
48 prepared to handle possible diabetic ketoacidosis (DKA) and must refer all cases. Overall, six  
49  
50 (20%) Level 2 and 3 facilities have a glucometer and five (17%) have insulin.  
51  
52  
53  
54  
55  
56  
57  
58  
59  
60

1  
2  
3 In regards to a standard procedure for cases of possible sepsis, fifteen (50%) of the 30 providers  
4  
5 at Level 2 and 3 facilities said they refer, 11 (37%) reported providing treatment without  
6  
7 referral (e.g., antibiotics, IV fluids), and four (13%) providers said that they did not know how to  
8  
9 approach sepsis. A majority of the Level 2 and 3 facilities (24/30, 80%) have antibiotics.  
10  
11

### 12 13 14 15 16 **Facility Levels 4 and 5**

#### 17 18 *Common Conditions*

19  
20 The most frequently reported presenting emergent and urgent conditions at Level 4 and 5  
21  
22 facilities were similar to those at Level 2 and 3 facilities. They are (in rank order): malaria  
23  
24 (30/30, 100%), diarrhea (22/30, 73%), sexually transmitted infections (21/30, 70%), pneumonia  
25  
26 (21/30, 70%), RTAs/trauma (18/30, 60%), and upper respiratory infections (16/30, 53%).  
27  
28  
29

#### 30 31 32 *Trauma and Injury*

33  
34 Nine (30%) providers at Level 4 and 5 facilities reported that their facility has an organized  
35  
36 approach to trauma (e.g., emergency team with assembly point). When asked if they are  
37  
38 notified in advance of patients arriving to the hospital, four (13%) answered in the affirmative.  
39  
40

41  
42 In review of basic trauma supplies in Level 4 and 5 facilities, 97% have gloves, 93% have suture  
43  
44 and wound care materials, and 83% have oxygen. All five of the Level 5 facilities have chest  
45  
46 tubes and x-ray capability, and four of the five have splinting and casting supplies. Three (12%)  
47  
48 of the 25 Level 4 facilities have chest tubes and 12 (48%) have x-ray capability. Sixteen (64%) of  
49  
50 the 25 Level 4 facilities, and all five of the Level 5 facilities have blood available for transfusion.  
51  
52  
53  
54  
55  
56  
57  
58  
59  
60

1  
2  
3  
4 Seventeen (57%) providers at Level 4 and 5 facilities reported that their facility does not have  
5  
6 access to a trained provider that can administer general or regional anesthesia.  
7  
8  
9

### 10 *Critical Care*

11  
12  
13 When asked about diagnosis and treatment of someone presenting with a possible acute  
14  
15 myocardial infarction (AMI), 20 (80%) of 25 providers at level 4 hospitals reported that their  
16  
17 facility refers; 11 (44%) reported that their facility stabilizes (e.g., oxygen or first aid) and then  
18  
19 refers, and nine (30%) providers reported that their facility refers immediately. Five (20%)  
20  
21 providers at Level 4 facilities reported that their facility provides diagnostic and treatment  
22  
23 services without referral (e.g., ACE inhibitors, beta blockers, or aspirin). All 5 Level 5 facilities  
24  
25 reported giving oxygen to suspected AMI patients, while three reported providing aspirin, two  
26  
27 reported providing morphine and one reported providing epinephrine. Several of the Level 4  
28  
29 and 5 facilities were lacking in supplies and equipment to manage cardiac emergencies. Fifteen  
30  
31 (50%) facilities have morphine, six (20%) have a functioning ECG machine, six (20%) have  
32  
33 nitroglycerin, and four (13%) have a defibrillator.  
34  
35  
36  
37  
38  
39  
40  
41  
42  
43  
44  
45  
46  
47  
48  
49  
50  
51  
52  
53  
54  
55  
56  
57  
58  
59  
60

43  
44 Ten (33%) of 30 providers at Level 4 and 5 facilities reported that their facility is well-prepared  
45  
46 to manage DKA. A majority of Level 4 and 5 facilities have a glucometer (28/30, 93%) and  
47  
48 insulin (24/30, 80%).  
49  
50  
51  
52  
53  
54  
55  
56  
57  
58  
59  
60

54  
55 When asked about a standard procedure for cases of sepsis, the vast majority (29/30, 97%) of  
56  
57 Level 4 and 5 facilities reported providing some treatment for sepsis (e.g., antibiotics, IV fluids),  
58  
59  
60

1  
2  
3 but none had standardized clinical care guidelines. Twenty-three (92%) of the 25 Level 4 and all  
4  
5 five of the Level 5 facilities have vasopressor agents. Twenty-two (88%) of the 25 Level 4 and all  
6  
7 five of the Level 5 facilities have antibiotics.  
8  
9

## 10 11 12 13 **Discussion**

14  
15  
16 With an increasing number of NCDs, RTAs, and other time-sensitive illnesses and injuries, the  
17  
18 provision of emergency care in low-and middle-income countries is taking on increasing  
19  
20 importance. Our study illustrates that essential emergency and urgent care is severely lacking in  
21  
22 western Kenya. Limited communication, infrastructure, supplies, and properly trained human  
23  
24 resources all negatively impact the ability to deliver quality emergency and urgent health care.  
25  
26  
27

28  
29  
30  
31 Although by definition Level 2 and Level 3 facilities in Kenya are not designed nor expected to  
32  
33 provide comprehensive care for acutely ill patients, we elected to study their capabilities  
34  
35 around emergency care since community members often present to them with acute life-  
36  
37 threatening illnesses and injuries. We discovered that virtually all of the 30 Level 2 and 3  
38  
39 facilities we studied were unable to respond to the essential needs of patients presenting with  
40  
41 acute trauma, a possible heart attack, diabetic emergencies, or sepsis. Most facilities reported  
42  
43 transferring patients without even basic assessments or interventions. Few facilities had any  
44  
45 organized approach in transferring a patient or notifying the receiving facility.  
46  
47  
48  
49

50  
51  
52  
53 The authors view the Level 2 and 3 facility findings as a compelling call to action for the  
54  
55 development of a contextually appropriate, standardized basic level training and materials  
56  
57  
58  
59  
60

1  
2  
3 package for emergency care. For example, a training program in the essentials of emergency  
4  
5 care for Level 2 and 3 facilities should include the development of a standard approach to all  
6  
7 acute care patients: basic assessment and intervention of airway, breathing, and circulation;  
8  
9 taking and interpreting vital signs; methodical total body assessment; hemorrhage control;  
10  
11 immobilization and splinting of potential injuries; capabilities of providing basic high-impact  
12  
13 diagnostics and interventions (e.g., point-of-care glucose, ECG, aspirin, antibiotics, splints); and  
14  
15 a pre-established reliable and rapid referral and notification plan.  
16  
17  
18  
19  
20  
21  
22

23 While emergent and urgent conditions present frequently to Level 4 and 5 facilities, we  
24  
25 discovered that the hospitals' capabilities varied considerably. While all of the 30 facilities had  
26  
27 gaps across each of the domains we studied, many of the gaps at the Level 4 facilities were  
28  
29 quite profound. Overall, some of the more salient findings in the Level 4 and 5 facilities'  
30  
31 assessments were: 70% do not have a standardized approach to trauma, few have the basic  
32  
33 materials necessary to manage trauma (e.g. chest tube, blood), less than half have a functioning  
34  
35 x-ray machine, less than half (43%) of the operating theatres have access to an anesthetist, only  
36  
37 six of 30 have EKG machines or nitroglycerin, most do not give aspirin for heart attacks, few are  
38  
39 able to provide care for DKA, and no facility had a standardized approach to sepsis.  
40  
41  
42  
43  
44  
45  
46  
47  
48

49 The findings from our Level 4 and Level 5 facility assessment demonstrate an urgent need for a  
50  
51 system-wide intervention, targeting the unmet higher-level facility needs of the acutely ill and  
52  
53 injured. Many of the Level 4 and 5 facilities do not meet the most basic standard for the  
54  
55 essentials of emergency care delivery that we believe can – and should – be universally  
56  
57  
58  
59  
60

1  
2  
3 implemented at all lower-level facilities. We propose that in addition to every facility being  
4  
5 brought up to the basic level, a second package in essentials of advanced emergency care  
6  
7 should be developed and deployed to select Level 4 and 5 facilities. These selected facilities,  
8  
9 once meeting standards for training, materials, and infrastructure, should then be designated  
10  
11 and widely recognized and supported as *centers of excellence for advanced emergency care*,  
12  
13 and thereby capable of providing quality assessment and initial stabilization of all emergent and  
14  
15 urgent conditions.  
16  
17  
18  
19  
20  
21  
22

23  
24 Access to quality pre-hospital care services was universally poor in our study sample and can be  
25  
26 seen as an opportunity for organization and improvement. A basic pre-hospital system should  
27  
28 be created by establishing a mechanism to access reliable transportation staffed with personnel  
29  
30 who have basic life-support skills. Elsewhere, it has been shown that training lay people in the  
31  
32 community, such as community health workers or public transportation drivers to function as  
33  
34 pre-hospital care providers, can greatly improve the quality of emergency care.<sup>17</sup> Additionally, a  
35  
36 standardized communication method ought to be instituted. For example, in Sierra Leone, it  
37  
38 has been shown that equipping remote health facilities and traditional birth attendants with  
39  
40 radio receivers linked to referral hospitals can shorten response times and reduce maternal  
41  
42 deaths.<sup>18</sup>  
43  
44  
45  
46  
47  
48  
49  
50

51 Although not addressed in this study, it is likely that these findings would be similar elsewhere  
52  
53 across sub-Saharan Africa. If this assessment is indeed generalizable, the authors believe that  
54  
55 the development of a set of standardized packages for basic and advanced essentials of  
56  
57  
58  
59  
60



1  
2  
3 emergency care in low-resource settings, as well as designating *centers of excellence for*  
4  
5 *advanced emergency care*, should be a priority for the WHO and other stakeholders.  
6  
7  
8  
9

10  
11 Our study had several limitations. Although we believe the lessons learned are representative  
12  
13 of counties in Kenya and other low-resource settings globally, our findings are not definitively  
14  
15 generalizable beyond the two counties surveyed. Furthermore, we recognize that elements of  
16  
17 our survey may have been limited by social desirability bias. Although we tried to mitigate this  
18  
19 with the anonymous nature of our survey and by explaining the purpose of our study,  
20  
21 participants may not have felt comfortable reporting problems or inadequacies in their  
22  
23 facilities. While our research staff included a local Kenyan who was present at all site visits and  
24  
25 functioned as a language and cultural ambassador, language and cultural differences may have  
26  
27 contributed to confounding variables. Furthermore, while informants were selected based on  
28  
29 their senior leadership roles and expertise with the operations of their facility, their responses  
30  
31 might not have always accurately reflected opinions of the majority of providers at the facility.  
32  
33  
34  
35  
36  
37  
38  
39  
40

41 In conclusion, with an increasing epidemic of NCDs and an increasing burden of injury and  
42  
43 trauma in low-resource areas, access to quality essential emergency and urgent care services is  
44  
45 critical for the health of surrounding communities. Our 60-facility assessment in western Kenya  
46  
47 identified significant widespread gaps in current emergency care capabilities, particularly in  
48  
49 identifying and appropriately caring for victims of trauma, acute myocardial infarction, diabetic  
50  
51 emergencies, and sepsis. There is great opportunity for development of a universally deployed  
52  
53 basic package in the essentials of emergency care, a selectively implemented package in the  
54  
55  
56  
57  
58  
59  
60

1  
2  
3 essentials of advanced emergency care, a center of excellence for emergency care facility  
4  
5 designation scheme, and a reliable pre-hospital care transportation and communications  
6  
7 system. Additionally, the profound gap in readily available trained anesthetists requires  
8  
9 immediate attention.  
10  
11  
12  
13  
14  
15  
16  
17  
18  
19  
20  
21  
22  
23  
24  
25  
26  
27  
28  
29  
30  
31  
32  
33  
34  
35  
36  
37  
38  
39  
40  
41  
42  
43  
44  
45  
46  
47  
48  
49  
50  
51  
52  
53  
54  
55  
56  
57  
58  
59  
60

For peer review only

**Table 1: Description of levels of care in Kenya**

|         |                          |                                                                                                                                                                                                                                                                                                                                                                                                                                                                    |
|---------|--------------------------|--------------------------------------------------------------------------------------------------------------------------------------------------------------------------------------------------------------------------------------------------------------------------------------------------------------------------------------------------------------------------------------------------------------------------------------------------------------------|
| Level 1 | Community                | <ul style="list-style-type: none"> <li>- Care outside facility in households, communities, and villages</li> <li>- Maximum population served: 5,000</li> </ul>                                                                                                                                                                                                                                                                                                     |
| Level 2 | Dispensaries/<br>Clinics | <ul style="list-style-type: none"> <li>- Has limited staff (nurses, public health technicians, and assistants)</li> <li>- Responsible for community engagement through curative, promotive, preventive, and rehabilitative care at a basic level</li> <li>- Up to four beds for observation</li> <li>- Maximum population served: 10,000(rural) - 15,000(urban)</li> </ul>                                                                                         |
| Level 3 | Health<br>Centers        | <ul style="list-style-type: none"> <li>- Staffed by nurses, clinical officers, and occasionally doctors</li> <li>- Wider range of curative and preventive services than Level 2</li> <li>- Provide minor surgical services, like incision and drainage</li> <li>- Basic emergency preparedness</li> <li>- 12-49 beds</li> <li>- Maximum population served: 30,000-40,000</li> </ul>                                                                                |
| Level 4 | Primary<br>Hospitals     | <ul style="list-style-type: none"> <li>- Provide referral level outpatient care, curative and preventive care, surgical treatment techniques, and comprehensive emergency services</li> <li>- Provide clinical services in obstetrics and gynecology, child health, medicine, and surgery and anesthesia</li> <li>- Inpatient care and 24-hour service</li> <li>- Minimum 50 beds</li> <li>- Maximum population served: 100,000(rural) - 200,000(urban)</li> </ul> |

1  
2  
3  
4  
5  
6  
7  
8  
9  
10  
11  
12  
13  
14  
15  
16  
17  
18  
19  
20  
21  
22  
23  
24  
25  
26  
27  
28  
29  
30  
31  
32  
33  
34  
35  
36  
37  
38  
39  
40  
41  
42  
43  
44  
45  
46  
47  
48  
49  
50  
51  
52  
53  
54  
55  
56  
57  
58  
59  
60

|           |                                             |                                                                                                                                                                                                                                                                                                                                                                                              |
|-----------|---------------------------------------------|----------------------------------------------------------------------------------------------------------------------------------------------------------------------------------------------------------------------------------------------------------------------------------------------------------------------------------------------------------------------------------------------|
| Level 5-6 | Secondary/<br><br>Tertiary<br><br>Hospitals | - Higher concentration of resources and personnel (medical professionals, nurses, and midwives)<br><br>- Provide clinical services in medicine, general surgery and anesthesia, pediatrics, and obstetrics/gynecology, dental, psychiatry, comprehensive accident and emergency, ENT, ophthalmology, dermatology, ICU<br><br>- Minimum 50 beds<br><br>- Maximum population served: 1,000,000 |
|-----------|---------------------------------------------|----------------------------------------------------------------------------------------------------------------------------------------------------------------------------------------------------------------------------------------------------------------------------------------------------------------------------------------------------------------------------------------------|

For peer review only

**Table 2: Health facilities studied in Kisumu and Siaya counties in Kenya; November 2013-  
January 2014**

| Type of Health Facility            | Kisumu    | Siaya     | Total     |
|------------------------------------|-----------|-----------|-----------|
| Dispensary/Health Clinic (Level 2) | 9         | 12        | <b>21</b> |
| Health Center (Level 3)            | 6         | 3         | <b>9</b>  |
| Primary Hospitals (Level 4)        | 18        | 6         | <b>25</b> |
| Secondary Hospitals (Level 5)      | 4         | 1         | <b>5</b>  |
| <b>Total</b>                       | <b>38</b> | <b>22</b> | <b>60</b> |

**Table 3: Functioning supplies and equipment at health facilities in Kisumu and Siaya, Kenya**  
(number of facilities)

|                                | <b>Level 2</b><br>n=21 (%) | <b>Level 3</b><br>n=9 (%) | <b>Level 4</b><br>n=25 (%) | <b>Level 5</b><br>n=5 (%) | <b>Total</b><br>n=60 (%) |
|--------------------------------|----------------------------|---------------------------|----------------------------|---------------------------|--------------------------|
| <b>General</b>                 |                            |                           |                            |                           |                          |
| Gloves                         | 20 (95)                    | 7 (78)                    | 24 (96)                    | 5 (100)                   | 56 (93)                  |
| Face masks                     | 10 (48)                    | 4 (44)                    | 21 (84)                    | 5 (100)                   | 40 (67)                  |
| Gowns                          | 3 (14)                     | 4 (44)                    | 17 (68)                    | 5 (100)                   | 29 (48)                  |
| Monitored beds                 | NA                         | NA                        | 1 (4)                      | 4 (80)                    | 6 (10)                   |
| Central line kits              | NA                         | NA                        | 1 (4)                      | 4 (80)                    | 5 (8)                    |
| Suction                        | 5 (24)                     | 4 (44)                    | 19 (76)                    | 4 (80)                    | 32 (53)                  |
| Blood pressure cuffs           | 18 (86)                    | 6 (67)                    | 23 (92)                    | 5 (100)                   | 52 (87)                  |
| Splint/cast supplies           | 2 (10)                     | 1 (11)                    | 14 (56)                    | 4 (80)                    | 21 (35)                  |
| Suture and wound-care supplies | 18 (86)                    | 8 (89)                    | 23 (92)                    | 5 (100)                   | 54 (90)                  |
| Defibrillator                  | 1 (5)                      | 0 (0)                     | 1 (4)                      | 3 (60)                    | 5 (8)                    |
| Back-up power                  | 1 (5)                      | 2 (22)                    | 14 (56)                    | 5 (100)                   | 22 (42)                  |
| Chest tube trays               | 1 (5)                      | 1 (11)                    | 3 (12)                     | 5 (100)                   | 10 (17)                  |

|                                 |         |        |         |         |         |
|---------------------------------|---------|--------|---------|---------|---------|
| <b>Laboratory/Diagnostics</b>   |         |        |         |         |         |
| Ultrasound                      | 1 (5)   | 0 (0)  | 9 (36)  | 5 (100) | 15 (25) |
| ECG                             | 0 (0)   | 1 (11) | 3 (12)  | 3 (60)  | 8 (13)  |
| X-ray                           | 1 (5)   | 0 (0)  | 12 (48) | 5 (100) | 18 (30) |
| Otoscope                        | 5 (24)  | 4 (44) | 14 (56) | 5 (100) | 28 (47) |
| Ophthalmoscope                  | 4 (19)  | 4 (44) | 13 (52) | 5 (100) | 26 (43) |
| Glucometer                      | 3 (14)  | 3 (33) | 23 (92) | 5 (100) | 34 (57) |
| <b>Medications</b>              |         |        |         |         |         |
| Nitroglycerin                   | 0 (0)   | 1 (11) | 4 (16)  | 2 (40)  | 7 (12)  |
| Antibiotics                     | 16 (76) | 8 (89) | 22 (88) | 5 (100) | 51 (85) |
| Opiates                         | 0 (0)   | 0 (0)  | 10 (40) | 5 (100) | 15 (25) |
| Insulin                         | 4 (19)  | 1 (11) | 19 (76) | 5 (100) | 29 (48) |
| Pressors                        | NA      | NA     | 23 (92) | 5 (100) | 48 (80) |
| General and regional anesthesia | NA      | NA     | 8 (32)  | 5 (100) | 13 (22) |
| <b>Airway/Breathing</b>         |         |        |         |         |         |
| Oxygen                          | 5 (24)  | 2 (22) | 20 (80) | 5 (100) | 32 (53) |

|                      |        |        |         |         |         |
|----------------------|--------|--------|---------|---------|---------|
| CPAP/BPAP<br>machine | NA     | NA     | 0 (0)   | 1 (20)  | 1 (2)   |
| Ambubag              | 8 (38) | 1 (11) | 20 (80) | 5 (100) | 34 (57) |
| Intubation supplies  | 2 (10) | 4 (44) | 12 (48) | 5 (100) | 23 (38) |

For peer review only



**Funding:**

This research received no specific grant from any funding agency in the public, commercial, or not-for-profit sectors. This study was funded internally and by in-kind donation by the authors' Division of Global Health and Human Rights at Massachusetts General Hospital.

**Competing interests:**

All of the authors have been formally queried, and no authors have competing interests with this study.

**Data sharing statement:** Extra data are available by emailing [tfburke@partners.org](mailto:tfburke@partners.org).

**Author contributions:**

TFB was involved in study design, implementation, analysis, and writing of the manuscript. RA was involved in study analysis and writing of the manuscript. RA was involved in study design, implementation, analysis, and writing of the manuscript. MW, DY, REA, ST, RC, and WO were involved in study design and data collection. BDN was involved in study design, implementation, analysis, and writing of the manuscript. All authors have reviewed, edited, and approved the final submission. TFB takes responsibility for the paper as a whole.

## References

- 1 World Health Organization. Global status report on noncommunicable diseases 2010. Geneva: World Health Organization, 2010.
- 2 Peden M, McGee K, Sharma G. The injury chartbook: A graphical overview of the global burden of injuries. Geneva: World Health Organization, 2002.
- 3 Gosselin R, Spiegel D, Coughlin R, et al. Injuries: the neglected burden in developing countries. *Bulletin of the World Health Organization* 2009; **87**:246.
- 4 Mock C, Lormand JD, Goosen J, et al. Guidelines for essential trauma care. Geneva: World Health Organization, 2004.
- 5 Odhiambo FO, Beynon CM, Ogwang S, et al. Trauma-related mortality among adults in rural western Kenya: Characterising deaths using data from a health and demographic surveillance system. *PLoS ONE* 2013; **8**(11):e79840.
- 6 Ministry of Health, Government of Kenya. Guidelines for antiretroviral drug therapy in Kenya. 2011. Available at: [http://www.who.int/hiv/pub/guidelines/kenya\\_art.pdf](http://www.who.int/hiv/pub/guidelines/kenya_art.pdf). Accessed 7 May 2014.
- 7 Ministry of Public Health and Sanitation. Guidelines on management of leprosy and tuberculosis. 2009. Available at: [http://www.who.int/hiv/pub/guidelines/kenya\\_tb.pdf](http://www.who.int/hiv/pub/guidelines/kenya_tb.pdf). Accessed 7 May 2014.
- 8 Baker T, Lugazia E, Eriksen J, et al. Emergency and critical care services in Tanzania: A survey of ten hospitals. *BMC Health Services Research* 2013; **13**:140.
- 9 Wallis LA, Garach SR, Kropman A. State of emergency medicine in South Africa. *Int J Emerg Med* 2008; **1**(2):69–71.

- 1  
2  
3  
4  
5  
6  
7  
8  
9  
10  
11  
12  
13  
14  
15  
16  
17  
18  
19  
20  
21  
22  
23  
24  
25  
26  
27  
28  
29  
30  
31  
32  
33  
34  
35  
36  
37  
38  
39  
40  
41  
42  
43  
44  
45  
46  
47  
48  
49  
50  
51  
52  
53  
54  
55  
56  
57  
58  
59  
60
- 10 Wen LS, Oshiomogho JI, Eluwa GI, et al. Characteristics and capabilities of emergency departments in Abuja, Nigeria. *Emerg Med J* 2012; **29**(10):798–801.
- 11 Wachira BW, Wallis LA, Geduld H. An analysis of the clinical practice of emergency medicine in public emergency departments in Kenya. *Emerg Med J* 2012; **29**(6):473–6.
- 12 Commission on Revenue Allocation (2011) Kenya County Fact Sheets. Available at: [http://siteresources.worldbank.org/INTAFRICA/Resources/257994-1335471959878/Kenya\\_County\\_Fact\\_Sheets\\_Dec2011.pdf](http://siteresources.worldbank.org/INTAFRICA/Resources/257994-1335471959878/Kenya_County_Fact_Sheets_Dec2011.pdf). Accessed 7 May 2014.
- 13 Commission on Revenue Allocation (2011) Kenya County Fact Sheets. Available at: [http://siteresources.worldbank.org/INTAFRICA/Resources/257994-1335471959878/Kenya\\_County\\_Fact\\_Sheets\\_Dec2011.pdf](http://siteresources.worldbank.org/INTAFRICA/Resources/257994-1335471959878/Kenya_County_Fact_Sheets_Dec2011.pdf). Accessed 7 May 2014.
- 14 Luoma M, Doherty J, Muchiri S, et al. August 2010. *Kenya Health System Assessment* 2010. Bethesda, MD: Health Systems 20/20 project, Abt Associates Inc.
- 15 World Health Organization. Guidelines for essential trauma care. Geneva, World Health Organization, 2004.
- 16 Razzak JA, Hyder AA, Akhtar T, et al. Assessing emergency medical care in low-income countries: A pilot study from Pakistan. *BMC Emergency Medicine* 2008; **8**:8.
- 17 Mock CN, Tiska M, Adu-Ampofo M, et al. Improvements in prehospital trauma care in an African country with no formal emergency medical services. *J Trauma* 2002; **53**(1): 90–7.
- 18 Samai O, Senegheh P. Facilitating emergency obstetrical care through transportation and communication, Bo, Sierra Leone. *International Journal of Gynecology and Obstetrics* 1997; **59** Suppl **2**:S157–64.

1  
2  
3  
4  
5  
6  
7  
8  
9  
10  
11  
12  
13  
14  
15  
16  
17  
18  
19  
20  
21  
22  
23  
24  
25  
26  
27  
28  
29  
30  
31  
32  
33  
34  
35  
36  
37  
38  
39  
40  
41  
42  
43  
44  
45  
46  
47  
48  
49  
50  
51  
52  
53  
54  
55  
56  
57  
58  
59  
60

## Manuscript: Emergency and urgent care capacity: an assessment of health facilities in western Kenya

Thomas F. Burke, et al.

STROBE Statement—checklist of items that should be included in reports of observational studies

|                              | Item No | Recommendation                                                                                                                                                                                                                                                                                                                                                                                                                                                         | DONE | PAGE  |
|------------------------------|---------|------------------------------------------------------------------------------------------------------------------------------------------------------------------------------------------------------------------------------------------------------------------------------------------------------------------------------------------------------------------------------------------------------------------------------------------------------------------------|------|-------|
| <b>Title and abstract</b>    | 1       | (a) Indicate the study's design with a commonly used term in the title or the abstract                                                                                                                                                                                                                                                                                                                                                                                 | X    | 1, 5  |
|                              |         | (b) Provide in the abstract an informative and balanced summary of what was done and what was found                                                                                                                                                                                                                                                                                                                                                                    | X    | 5     |
| <b>Introduction</b>          |         |                                                                                                                                                                                                                                                                                                                                                                                                                                                                        |      |       |
| Background/rationale         | 2       | Explain the scientific background and rationale for the investigation being reported                                                                                                                                                                                                                                                                                                                                                                                   | X    | 6-8   |
| Objectives                   | 3       | State specific objectives, including any prespecified hypotheses                                                                                                                                                                                                                                                                                                                                                                                                       | X    | 8     |
| <b>Methods</b>               |         |                                                                                                                                                                                                                                                                                                                                                                                                                                                                        |      |       |
| Study design                 | 4       | Present key elements of study design early in the paper                                                                                                                                                                                                                                                                                                                                                                                                                | X    | 8     |
| Setting                      | 5       | Describe the setting, locations, and relevant dates, including periods of recruitment, exposure, follow-up, and data collection                                                                                                                                                                                                                                                                                                                                        | X    | 8-10  |
| Participants                 | 6       | (a) <i>Cohort study</i> —Give the eligibility criteria, and the sources and methods of selection of participants. Describe methods of follow-up<br><i>Case-control study</i> —Give the eligibility criteria, and the sources and methods of case ascertainment and control selection. Give the rationale for the choice of cases and controls<br><i>Cross-sectional study</i> —Give the eligibility criteria, and the sources and methods of selection of participants | X    | 9-10  |
|                              |         | (b) <i>Cohort study</i> —For matched studies, give matching criteria and number of exposed and unexposed<br><i>Case-control study</i> —For matched studies, give matching criteria and the number of controls per case                                                                                                                                                                                                                                                 |      |       |
| Variables                    | 7       | Clearly define all outcomes, exposures, predictors, potential confounders, and effect modifiers. Give diagnostic criteria, if applicable                                                                                                                                                                                                                                                                                                                               | X    | 9     |
| Data sources/<br>measurement | 8*      | For each variable of interest, give sources of data and details of methods of assessment (measurement). Describe comparability of assessment methods if there is more than one group                                                                                                                                                                                                                                                                                   | X    | 9     |
| Bias                         | 9       | Describe any efforts to address potential sources of bias                                                                                                                                                                                                                                                                                                                                                                                                              | X    | 17-18 |
| Study size                   | 10      | Explain how the study size was arrived at                                                                                                                                                                                                                                                                                                                                                                                                                              | N/A  | N/A   |
| Quantitative variables       | 11      | Explain how quantitative variables were handled in the analyses. If applicable, describe which groupings were chosen and why                                                                                                                                                                                                                                                                                                                                           | N/A  | N/A   |
| Statistical methods          | 12      | (a) Describe all statistical methods, including those used to control for confounding                                                                                                                                                                                                                                                                                                                                                                                  | X    | 9-10  |
|                              |         | (b) Describe any methods used to examine subgroups and                                                                                                                                                                                                                                                                                                                                                                                                                 |      |       |

|                          |     |                                                                                                                                                                                                              |             |             |
|--------------------------|-----|--------------------------------------------------------------------------------------------------------------------------------------------------------------------------------------------------------------|-------------|-------------|
|                          |     | interactions                                                                                                                                                                                                 |             |             |
|                          |     | (c) Explain how missing data were addressed                                                                                                                                                                  | N/A         | N/A         |
|                          |     | (d) <i>Cohort study</i> —If applicable, explain how loss to follow-up was addressed                                                                                                                          | N/A         | N/A         |
|                          |     | <i>Case-control study</i> —If applicable, explain how matching of cases and controls was addressed                                                                                                           |             |             |
|                          |     | <i>Cross-sectional study</i> —If applicable, describe analytical methods taking account of sampling strategy                                                                                                 |             |             |
|                          |     | (e) Describe any sensitivity analyses                                                                                                                                                                        | N/A         | N/A         |
| <b>Results</b>           |     |                                                                                                                                                                                                              | <b>DONE</b> | <b>PAGE</b> |
| Participants             | 13* | (a) Report numbers of individuals at each stage of study—eg numbers potentially eligible, examined for eligibility, confirmed eligible, included in the study, completing follow-up, and analysed            | X           | 10          |
|                          |     | (b) Give reasons for non-participation at each stage                                                                                                                                                         | N/A         | N/A         |
|                          |     | (c) Consider use of a flow diagram                                                                                                                                                                           | N/A         | N/A         |
| Descriptive data         | 14* | (a) Give characteristics of study participants (eg demographic, clinical, social) and information on exposures and potential confounders                                                                     | X           | 10, 22      |
|                          |     | (b) Indicate number of participants with missing data for each variable of interest                                                                                                                          | N/A         | N/A         |
|                          |     | (c) Cohort study—Summarise follow-up time (eg, average and total amount)                                                                                                                                     | N/A         | N/A         |
| Outcome data             | 15* | Cohort study—Report numbers of outcome events or summary measures over time                                                                                                                                  | N/A         | N/A         |
|                          |     | Case-control study—Report numbers in each exposure category, or summary measures of exposure                                                                                                                 | N/A         | N/A         |
|                          |     | Cross-sectional study—Report numbers of outcome events or summary measures                                                                                                                                   | X           | 23-25       |
| Main results             | 16  | (a) Give unadjusted estimates and, if applicable, confounder-adjusted estimates and their precision (eg, 95% confidence interval). Make clear which confounders were adjusted for and why they were included | N/A         | N/A         |
|                          |     | (b) Report category boundaries when continuous variables were categorized                                                                                                                                    | N/A         | N/A         |
|                          |     | (c) If relevant, consider translating estimates of relative risk into absolute risk for a meaningful time period                                                                                             | N/A         | N/A         |
| Other analyses           | 17  | Report other analyses done—eg analyses of subgroups and interactions, and sensitivity analyses                                                                                                               | X           | 9           |
| <b>Discussion</b>        |     |                                                                                                                                                                                                              |             |             |
| Key results              | 18  | Summarise key results with reference to study objectives                                                                                                                                                     | X           | 14-15       |
| Limitations              | 19  | Discuss limitations of the study, taking into account sources of potential bias or imprecision. Discuss both direction and magnitude of any potential bias                                                   | X           | 17          |
| Interpretation           | 20  | Give a cautious overall interpretation of results considering objectives, limitations, multiplicity of analyses, results from similar studies, and other relevant evidence                                   | X           | 15-17       |
| Generalisability         | 21  | Discuss the generalisability (external validity) of the study results                                                                                                                                        | X           | 17          |
| <b>Other information</b> |     |                                                                                                                                                                                                              |             |             |

1  
2 Funding 22 Give the source of funding and the role of the funders for the present study  
3 and, if applicable, for the original study on which the present article is  
4 based  
5

|   |   |
|---|---|
| X | 3 |
|---|---|

6  
7 \*Give information separately for cases and controls in case-control studies and, if applicable, for exposed and  
8 unexposed groups in cohort and cross-sectional studies.  
9

10 **Note:** An Explanation and Elaboration article discusses each checklist item and gives methodological background and  
11 published examples of transparent reporting. The STROBE checklist is best used in conjunction with this article (freely  
12 available on the Web sites of PLoS Medicine at <http://www.plosmedicine.org/>, Annals of Internal Medicine at  
13 <http://www.annals.org/>, and Epidemiology at <http://www.epidem.com/>). Information on the STROBE Initiative is  
14 available at [www.strobe-statement.org](http://www.strobe-statement.org).  
15  
16  
17  
18  
19  
20  
21  
22  
23  
24  
25  
26  
27  
28  
29  
30  
31  
32  
33  
34  
35  
36  
37  
38  
39  
40  
41  
42  
43  
44  
45  
46  
47  
48  
49  
50  
51  
52  
53  
54  
55  
56  
57  
58  
59  
60

# BMJ Open

## Emergency and urgent care capacity in a resource-limited setting: an assessment of health facilities in western Kenya

|                                 |                                                                                                                                                                                                                                                                                                                                                                                                                                                                                                                                                                                                                                                                                                                                                                                                                       |
|---------------------------------|-----------------------------------------------------------------------------------------------------------------------------------------------------------------------------------------------------------------------------------------------------------------------------------------------------------------------------------------------------------------------------------------------------------------------------------------------------------------------------------------------------------------------------------------------------------------------------------------------------------------------------------------------------------------------------------------------------------------------------------------------------------------------------------------------------------------------|
| Journal:                        | <i>BMJ Open</i>                                                                                                                                                                                                                                                                                                                                                                                                                                                                                                                                                                                                                                                                                                                                                                                                       |
| Manuscript ID:                  | bmjopen-2014-006132.R1                                                                                                                                                                                                                                                                                                                                                                                                                                                                                                                                                                                                                                                                                                                                                                                                |
| Article Type:                   | Research                                                                                                                                                                                                                                                                                                                                                                                                                                                                                                                                                                                                                                                                                                                                                                                                              |
| Date Submitted by the Author:   | 02-Sep-2014                                                                                                                                                                                                                                                                                                                                                                                                                                                                                                                                                                                                                                                                                                                                                                                                           |
| Complete List of Authors:       | Burke, Thomas; Massachusetts General Hospital, Department of Emergency Medicine<br>Hines, Rosemary; Massachusetts General Hospital, Department of Emergency Medicine<br>Ahn, Roy; Massachusetts General Hospital, Department of Emergency Medicine<br>Walters, Michelle; Massachusetts General Hospital, Department of Emergency Medicine<br>Young, David; Massachusetts General Hospital, Department of Emergency Medicine<br>Anderson, Rachel; Massachusetts General Hospital, Department of Emergency Medicine<br>Tom, Sabrina; Massachusetts General Hospital, Department of Emergency Medicine<br>Clark, Rachel; Massachusetts General Hospital, Department of Emergency Medicine<br>Obita, Walter; Sagam Community Hospital,<br>Nelson, Brett; Massachusetts General Hospital, Department of Emergency Medicine |
| <b>Primary Subject Heading</b>: | Emergency medicine                                                                                                                                                                                                                                                                                                                                                                                                                                                                                                                                                                                                                                                                                                                                                                                                    |
| Secondary Subject Heading:      | Global health                                                                                                                                                                                                                                                                                                                                                                                                                                                                                                                                                                                                                                                                                                                                                                                                         |
| Keywords:                       | ACCIDENT & EMERGENCY MEDICINE, International health services < HEALTH SERVICES ADMINISTRATION & MANAGEMENT, TRAUMA MANAGEMENT                                                                                                                                                                                                                                                                                                                                                                                                                                                                                                                                                                                                                                                                                         |
|                                 |                                                                                                                                                                                                                                                                                                                                                                                                                                                                                                                                                                                                                                                                                                                                                                                                                       |

SCHOLARONE™  
Manuscripts

1  
2  
3 **Emergency and urgent care capacity in a resource-limited setting: an assessment of health**  
4  
5 **facilities in western Kenya**  
6  
7  
8  
9

10  
11 **Authors and affiliations**  
12

13 Thomas F. Burke, MD <sup>a, b, c</sup>  
14

15 Rosemary Hines <sup>a</sup>  
16

17 Roy Ahn, MPH, ScD <sup>a, b, c</sup>  
18

19 Michelle Walters <sup>a</sup>  
20

21 David Young, MD <sup>a</sup>  
22

23 Rachel Eleanor Anderson, MD <sup>a</sup>  
24

25 Sabrina Tom, MD <sup>a</sup>  
26

27 Rachel Clark <sup>a</sup>  
28

29 Walter Obita, MD <sup>c</sup>  
30

31 Brett D. Nelson, MD, MPH <sup>a, b, c</sup>  
32  
33  
34  
35

36  
37  
38  
39  
40  
41 a. Division of Global Health and Human Rights, Department of Emergency Medicine,  
42  
43 Massachusetts General Hospital, Zero Emerson Place, Suite 104, Boston, MA 02114, USA  
44

45  
46 b. Harvard Medical School, 25 Shattuck St, Boston, MA 02115, USA  
47

48  
49 c. Sagam Community Hospital, Siaya Road, Luanda 50307, Kenya  
50

51  
52  
53 **Corresponding author:**  
54

55  
56 Thomas F. Burke, MD, FACEP, FRSM  
57  
58  
59  
60



1  
2  
3 Division of Global Health and Human Rights, Massachusetts General Hospital

4  
5  
6 Zero Emerson Place, Suite 104, Boston, MA 02114, USA

7  
8 E-mail [tfburke@partners.org](mailto:tfburke@partners.org)

9  
10  
11 Phone +1-617-584-0064

12  
13  
14  
15  
16 **Funding:**

17  
18 This research received no specific grant from any funding agency in the public, commercial, or  
19  
20 not-for-profit sectors. This study was funded internally and by in-kind donation by the authors'  
21  
22  
23 Division of Global Health and Human Rights at Massachusetts General Hospital.  
24

25  
26  
27  
28 **Competing interests:**

29  
30 All of the authors have been formally queried, and no authors have competing interests with  
31  
32  
33 this study.  
34

35  
36  
37  
38 **Word count:**

39  
40  
41 2,953 words  
42  
43  
44

45  
46 **Keywords:**

47  
48 Emergency medicine

49  
50 Urgent care

51  
52 Capacity assessment

53  
54  
55  
56 Kenya  
57  
58  
59  
60

1  
2  
3  
4  
5  
6  
7  
8  
9  
10  
11  
12  
13  
14  
15  
16  
17  
18  
19  
20  
21  
22  
23  
24  
25  
26  
27  
28  
29  
30  
31  
32  
33  
34  
35  
36  
37  
38  
39  
40  
41  
42  
43  
44  
45  
46  
47  
48  
49  
50  
51  
52  
53  
54  
55  
56  
57  
58  
59  
60

Pre-hospital care

For peer review only

## Abstract

**Objective:** Injuries, trauma, and non-communicable diseases are responsible for a rising proportion of death and disability in low- and middle-income countries. Delivering effective emergency and urgent health care for these and other conditions in resource-limited settings is challenging. In this study, we sought to examine and characterize emergency and urgent care capacity in a resource-limited setting.

**Methods:** We conducted an assessment in western Kenya within all 30 primary and secondary hospitals and within a stratified random sampling of 30 dispensaries and health centers. Key informants were the most senior facility health care provider and manager available. Emergency physician researchers utilized a semi-structured assessment tool, and data were analyzed using descriptive statistics and thematic coding.

**Results:** No lower-level facilities and 30% of higher-level facilities reported having a defined, organized approach to trauma. Forty-three percent of higher-level facilities have access to an anesthetist. The majority of lower-level facilities have suture and wound care supplies and gloves but typically lack other basic trauma supplies. For cardiac care, 50% of higher-level facilities have morphine, but a minority have functioning ECG, sublingual nitroglycerin, or defibrillator. Only 20% of lower-level facilities have glucometers, and only 33% of higher-level facilities can care for diabetic emergencies. No facilities have sepsis clinical guidelines.

**Conclusions:** Large gaps in essential emergency care capabilities were identified at all facility levels in western Kenya. There is great opportunity for a universally deployed basic emergency care package, advanced emergency care package and facility designation scheme, and reliable pre-hospital care transportation and communications system for resource-limited settings.

**Strengths and limitations of this study:**

- This assessment was completed within all 30 primary and secondary hospitals and a stratified random sampling of 30 dispensaries and health centers in western Kenya
- Semi-structured interviews were conducted among facility leadership to examine and characterize emergency and urgent care capacity in this resource-limited setting
- Large gaps at all facility levels were identified in essential care capabilities
- There is great opportunity for a universally deployed basic emergency care package, advanced emergency care package and facility designation scheme, and reliable pre-hospital care transportation and communications system for resource-limited settings.
- The study may not be generalizable outside of this region.

## Introduction

### *Background and importance*

Providing effective emergency and urgent care is a considerable challenge in low- and middle-income countries. Difficulties exist with regard to transportation, communications, equipment, facility infrastructure, medication supply lines, affordability, and availability of skilled health care providers. Historically, infections caused by communicable diseases have been the major contributors to morbidity and mortality in resource-limited settings. However, traumatic injuries and non-communicable diseases (NCDs), such as heart disease and cancer, are rising rapidly and have recently become recognized as significant contributors to the burden of disease in developing countries. Eighty percent of all NCD deaths in 2008 (29 million) occurred in low- and middle-income countries, with cardiovascular disease, cancers, and respiratory disease the leading causes.<sup>1</sup> Furthermore, 16,000 people die globally each day from injuries alone, accounting for over 15% of the global burden of disease. Approximately 90% of these injuries occur in low- and middle-income countries.<sup>2-4</sup>

Kenya is facing an epidemic of NCDs and an increasing burden of injury and trauma. Between 2003 and 2008, the proportion of deaths related to trauma in western Kenya increased from 2.5% to 5.9%, with road traffic accidents (RTA) the leading cause.<sup>5</sup> In the past, most Kenya public health programs focused on communicable diseases. As a consequence, Kenya has developed disease-specific clinical guidelines for HIV/AIDS, malaria, tuberculosis, and other communicable diseases, but there are currently no national guidelines for emergency care.<sup>6,7</sup> As rates of NCDs and trauma-related injuries and deaths increase, there is a growing urgency to

1  
2  
3 provide adequate and organized treatment for time-sensitive illnesses and injuries, such as  
4  
5 acute myocardial infarction, stroke, trauma, and sepsis.  
6  
7  
8  
9

10  
11 Recent assessments performed in a select group of facilities in Nigeria, South Africa, and  
12  
13 Tanzania documented emergency and critical care services in terms of resources, routines, and  
14  
15 guidelines, while a small-scale evaluation of public emergency departments in Kenya described  
16  
17 the most common diagnoses of presenting patients.<sup>8-11</sup> Other facility-level studies in Kenya  
18  
19 have assessed inpatient care.<sup>12,13</sup> However, no assessment of the emergency care capabilities  
20  
21 across a region in Kenya has ever been published.  
22  
23  
24  
25  
26  
27

### 28 *Goals of this investigation*

29  
30  
31 The Division of Global Health and Human Rights in the Department of Emergency Medicine at  
32  
33 the Massachusetts General Hospital was approached by the Kenyan Ministry of Health and  
34  
35 asked to assess the emergency and urgent health care capabilities across all levels of facilities in  
36  
37 Kisumu and Siaya counties of western Kenya. This paper reports major findings from this  
38  
39 assessment.  
40  
41  
42  
43  
44  
45

### 46 *Health care provision in Kenya*

47  
48 Kenya has 6,626 health facilities across 47 counties, serving a population of over 43 million  
49  
50 people. Kisumu and Siaya counties have populations of 968,909 (52% urban) and 842,304 (11%  
51  
52 urban), respectively.<sup>14,15</sup> There are a total of 150 health facilities in Kisumu (92 public, 15 non-  
53  
54 governmental, 15 faith-based, and 28 private) and a total of 162 health facilities in Siaya (115  
55  
56  
57  
58  
59  
60

1  
2  
3 public, 7 non-governmental, 17 faith-based, and 23 private). The Kenya Essential Package for  
4  
5 Health (KEPH) defines the levels of care in Kenya: Level 1 for community-administered care and  
6  
7 Levels 2-6 for health care facilities (Table 1).<sup>16</sup> Levels 2, 3, 4, 5, and 6 represent dispensaries and  
8  
9 clinics, health centers, primary hospitals, secondary hospitals, and tertiary hospitals,  
10  
11 respectively.  
12  
13  
14

## 15 16 17 18 **Methods**

### 19 20 *Study design and setting*

21  
22 This facility-based emergency care capabilities assessment was conducted between November  
23  
24 1, 2013 and January 20, 2014, in Kisumu and Siaya counties in western Kenya. All 30 Level 4 and  
25  
26 5 facilities in the two counties (there are no Level 6 facilities in these counties) were selected  
27  
28 for assessment. Selection of 30 additional facilities occurred via randomized stratified sampling  
29  
30 of each additional type of facility – dispensary, health center, and health clinic. The criterion for  
31  
32 inclusion was an open healthcare facility currently providing health services; there were no  
33  
34 restrictions based on geography or accessibility.  
35  
36  
37  
38  
39  
40  
41  
42

### 43 44 *Methods and measurements*

45  
46 This facility-based emergency care capabilities assessment utilized semi-structured, key-  
47  
48 informant interviews using a data collection instrument designed by the study authors. The key  
49  
50 informants were the most senior institution staff members identified during the day of the  
51  
52 assessment – typically the chief medical officer and/or senior administrator. The assessment  
53  
54 tool drew from existing models of facility assessment in South Africa, Pakistan, and Tanzania, as  
55  
56  
57  
58  
59  
60

1  
2  
3 well as the WHO Guidelines for Essential Trauma Care.<sup>9,10,17,18</sup> The assessment tool was refined  
4  
5  
6 by expert consultation with the team's emergency physicians and public health epidemiologists,  
7  
8  
9 and covered eight domains: facility demographics, referral services, personnel, economics,  
10  
11 supplies and laboratory, trauma, critical care, and anesthesia. The interviews consisted of open-  
12  
13 response questions related to health care services, most common conditions of patients  
14  
15 presenting for care, provider capabilities, equipment, supplies, and medications. Qualitative  
16  
17 questions pertained to attitudes and perceptions related to provider morale, cooperation and  
18  
19 communication between referring and receiving health facilities, and recommendations for  
20  
21 continuing education and referral services.  
22  
23  
24  
25  
26  
27

28 The key-informant interviews were conducted by our field research team – consisting at all  
29  
30 times of at least one emergency physician and one research assistant. Three different  
31  
32 emergency physicians were involved throughout the data collection process. The delivery of  
33  
34 questions and interview structure were discussed *a priori* by all three physician interviewers in  
35  
36 order to standardize the interview process. Participants were provided an overview of the  
37  
38 project, and the voluntary and confidential nature of the assessment was described. All  
39  
40 participants gave verbal consent prior to participation.  
41  
42  
43  
44  
45  
46  
47

#### 48 *Analysis*

49  
50 Data were analyzed using standard descriptive and frequency analyses, utilizing Microsoft Excel  
51  
52 2007 (Seattle, WA, USA). Qualitative research methods involved thematic analysis of interviews  
53  
54 in order to best understand emergent findings.  
55  
56  
57  
58  
59  
60



### *Ethical review and funding*

This study was reviewed and approved by the Institutional Review Board of Partners Healthcare (Boston, MA, USA) and the Ministry of Health of Kenya. This research received no specific grant from any funding agency in the public, commercial, or not-for-profit sectors.

## **Results**

A key informant at each of the 60 facilities was surveyed between November 1, 2013 and January 20, 2014. The facility sites were a mix of dispensaries/health clinics, health centers, primary hospitals, and secondary hospitals, as shown in Table 2. (There are no tertiary hospitals in Kisumu or Siaya County.) The 60 key informants comprised 10 chief medical officers (all at the hospital level), 39 nurse managers (facility matron), and 11 lead clinical officers.

### ***Level 2 and 3 Facilities***

#### *Common Conditions*

Key informants were asked to list the 10 most common emergent and urgent conditions presenting to their health facility. The most frequently reported conditions at Level 2 and 3 facilities were (in rank order) malaria (30/30, 100%), diarrhea (26/30, 87%), upper respiratory infections (24/30, 80%), skin infections (18/30, 60%), sexually transmitted infections (15/30, 50%), pneumonia (14/30, 47%), and RTAs/trauma (9/30, 30%).

#### *Trauma and Injury*

1  
2  
3 When asked if their Level 2 and 3 facilities have a specific approach to a trauma patient that  
4 differs from how they approach a medical patient, 0% of key informants answered in the  
5 affirmative. In response to how well respondents felt their facility can handle major trauma, all  
6 30 said they refer. Twenty-six (87%) of the 30 said they refer immediately, and four (13%) said  
7 they try to provide first aid then refer. The majority of providers (21/30, 70%) said their facility  
8 is poorly equipped to handle a broken bone.  
9  
10  
11  
12  
13  
14  
15  
16  
17  
18  
19  
20

21 The majority of Level 2 and 3 facilities have suture and wound care supplies (26/30, 87%) and  
22 gloves (27/30, 90%) (Table 3). Few of these facilities have oxygen (7/30, 23%) and  
23 splinting/casting supplies (3/30, 10%), and none have blood for transfusion (0/30, 0%).  
24  
25  
26  
27  
28  
29  
30

### 31 *Critical Care*

32  
33 When asked about the standard procedure for treating someone with a possible heart attack,  
34 all 30 providers at Level 2 and 3 facilities reported that their facility refers. Eighteen (60%) of  
35 the 30 reported referring patients immediately, eight (27%) said they treat symptoms (e.g.,  
36 painkillers, oxygen) and then refer, and four (13%) said they check vitals and then refer. Of the  
37 30 Level 2 and 3 facilities, one has sublingual nitroglycerin.  
38  
39  
40  
41  
42  
43  
44  
45  
46  
47  
48

49 The majority of providers (29/30, 93%) at the lower-level facilities said that their facility is ill-  
50 prepared to handle possible diabetic ketoacidosis (DKA) and must refer all cases. Overall, six  
51 (20%) Level 2 and 3 facilities have a glucometer and five (17%) have insulin.  
52  
53  
54  
55  
56  
57  
58  
59  
60

1  
2  
3 In regards to a standard procedure for cases of possible sepsis, fifteen (50%) of the 30 providers  
4  
5 at Level 2 and 3 facilities said they refer, 11 (37%) reported providing treatment without  
6  
7 referral (e.g., antibiotics, IV fluids), and four (13%) providers said that they did not know how to  
8  
9 approach sepsis. A majority of the Level 2 and 3 facilities (24/30, 80%) have antibiotics.  
10  
11

### 12 13 14 15 16 **Facility Levels 4 and 5**

#### 17 18 *Common Conditions*

19  
20 The most frequently reported presenting emergent and urgent conditions at Level 4 and 5  
21  
22 facilities were similar to those at Level 2 and 3 facilities. They are (in rank order): malaria  
23  
24 (30/30, 100%), diarrhea (22/30, 73%), sexually transmitted infections (21/30, 70%), pneumonia  
25  
26 (21/30, 70%), RTAs/trauma (18/30, 60%), and upper respiratory infections (16/30, 53%).  
27  
28  
29

#### 30 31 32 *Trauma and Injury*

33  
34 Nine (30%) providers at Level 4 and 5 facilities reported that their facility has an organized  
35  
36 approach to trauma (e.g., emergency team with assembly point). When asked if they are  
37  
38 notified in advance of patients arriving to the hospital, four (13%) answered in the affirmative.  
39  
40

41  
42 In review of basic trauma supplies in Level 4 and 5 facilities, 97% have gloves, 93% have suture  
43  
44 and wound care materials, and 83% have oxygen. All five of the Level 5 facilities have chest  
45  
46 tubes and x-ray capability, and four of the five have splinting and casting supplies. Three (12%)  
47  
48 of the 25 Level 4 facilities have chest tubes and 12 (48%) have x-ray capability. Sixteen (64%) of  
49  
50 the 25 Level 4 facilities, and all five of the Level 5 facilities have blood available for transfusion.  
51  
52  
53  
54  
55  
56  
57  
58  
59  
60

1  
2  
3 Seventeen (57%) providers at Level 4 and 5 facilities reported that their facility does not have  
4  
5 access to a trained provider that can administer general or regional anesthesia.  
6  
7  
8  
9

### 10 *Critical Care*

11  
12 When asked about diagnosis and treatment of someone presenting with a possible acute  
13  
14 myocardial infarction (AMI), 20 (80%) of 25 providers at level 4 hospitals reported that their  
15  
16 facility refers; 11 (44%) reported that their facility stabilizes (e.g., oxygen or first aid) and then  
17  
18 refers, and nine (30%) providers reported that their facility refers immediately. Five (20%)  
19  
20 providers at Level 4 facilities reported that their facility provides diagnostic and treatment  
21  
22 services without referral (e.g., ACE inhibitors, beta blockers, or aspirin). All 5 Level 5 facilities  
23  
24 reported giving oxygen to suspected AMI patients, while three reported providing aspirin, two  
25  
26 reported providing morphine and one reported providing epinephrine. Several of the Level 4  
27  
28 and 5 facilities were lacking in supplies and equipment to manage cardiac emergencies. Fifteen  
29  
30 (50%) facilities have morphine, six (20%) have a functioning ECG machine, six (20%) have  
31  
32 nitroglycerin, and four (13%) have a defibrillator.  
33  
34  
35  
36  
37  
38  
39  
40  
41  
42

43  
44 Ten (33%) of 30 providers at Level 4 and 5 facilities reported that their facility is well-prepared  
45  
46 to manage DKA. A majority of Level 4 and 5 facilities have a glucometer (28/30, 93%) and  
47  
48 insulin (24/30, 80%).  
49  
50  
51  
52

53  
54 When asked about a standard procedure for cases of sepsis, the vast majority (29/30, 97%) of  
55  
56 Level 4 and 5 facilities reported providing some treatment for sepsis (e.g., antibiotics, IV fluids),  
57  
58  
59  
60

1  
2  
3 but none had standardized clinical care guidelines. Twenty-three (92%) of the 25 Level 4 and all  
4  
5 five of the Level 5 facilities have vasopressor agents. Twenty-two (88%) of the 25 Level 4 and all  
6  
7 five of the Level 5 facilities have antibiotics.  
8  
9

## 10 11 12 13 **Discussion**

14  
15  
16 With an increasing number of NCDs, RTAs, and other time-sensitive illnesses and injuries, the  
17  
18 provision of emergency care in low-and middle-income countries is taking on increasing  
19  
20 importance. Our study illustrates that essential emergency and urgent care is severely lacking in  
21  
22 western Kenya. Limited communication, infrastructure, supplies, and properly trained human  
23  
24 resources all negatively impact the ability to deliver quality emergency and urgent health care.  
25  
26  
27

28  
29  
30  
31 Although by definition Level 2 and Level 3 facilities in Kenya are not designed nor expected to  
32  
33 provide comprehensive care for acutely ill patients, we elected to study their capabilities  
34  
35 around emergency care since community members often present to them with acute life-  
36  
37 threatening illnesses and injuries. We discovered that virtually all of the 30 Level 2 and 3  
38  
39 facilities we studied were unable to respond to the essential needs of patients presenting with  
40  
41 acute trauma, a possible heart attack, diabetic emergencies, or sepsis. Most facilities reported  
42  
43 transferring patients without even basic assessments or interventions. Few facilities had any  
44  
45 organized approach in transferring a patient or notifying the receiving facility.  
46  
47  
48  
49

50  
51  
52  
53 The authors view the Level 2 and 3 facility findings as a compelling call to action for the  
54  
55 development of a contextually appropriate, standardized basic level training and materials  
56  
57  
58  
59  
60

1  
2  
3 package for emergency care. For example, a training program in the essentials of emergency  
4  
5 care for Level 2 and 3 facilities should include the development of a standard approach to all  
6  
7 acute care patients: basic assessment and intervention of airway, breathing, and circulation;  
8  
9 taking and interpreting vital signs; methodical total body assessment; hemorrhage control;  
10  
11 immobilization and splinting of potential injuries; capabilities of providing basic high-impact  
12  
13 diagnostics and interventions (e.g., point-of-care glucose, ECG, aspirin, antibiotics, splints); and  
14  
15 a pre-established reliable and rapid referral and notification plan.  
16  
17  
18  
19  
20  
21  
22

23 While emergent and urgent conditions present frequently to Level 4 and 5 facilities, we  
24  
25 discovered that the hospitals' capabilities varied considerably. While all of the 30 facilities had  
26  
27 gaps across each of the domains we studied, many of the gaps at the Level 4 facilities were  
28  
29 quite profound. Overall, some of the more salient findings in the Level 4 and 5 facilities'  
30  
31 assessments were: 70% do not have a standardized approach to trauma, few have the basic  
32  
33 materials necessary to manage trauma (e.g. chest tube, blood), less than half have a functioning  
34  
35 x-ray machine, less than half (43%) of the operating theatres have access to an anesthetist, only  
36  
37 six of 30 have EKG machines or nitroglycerin, most do not give aspirin for heart attacks, few are  
38  
39 able to provide care for DKA, and no facility had a standardized approach to sepsis.  
40  
41  
42  
43  
44  
45  
46  
47  
48

49 The findings from our Level 4 and Level 5 facility assessment demonstrate an urgent need for a  
50  
51 system-wide intervention, targeting the unmet higher-level facility needs of the acutely ill and  
52  
53 injured. Many of the Level 4 and 5 facilities do not meet the most basic standard for the  
54  
55 essentials of emergency care delivery that we believe can – and should – be universally  
56  
57  
58  
59  
60

1  
2  
3 implemented at all lower-level facilities. We propose that in addition to every facility being  
4 brought up to the basic level, a second package in essentials of advanced emergency care  
5 should be developed and deployed to select Level 4 and 5 facilities. These selected facilities,  
6 once meeting standards for training, materials, and infrastructure, should then be designated  
7 and widely recognized and supported as *centers of excellence for advanced emergency care*,  
8 and thereby capable of providing quality assessment and initial stabilization of all emergent and  
9 urgent conditions.  
10  
11  
12  
13  
14  
15  
16  
17  
18  
19  
20

21  
22  
23 Access to quality pre-hospital care services was universally poor in our study sample and can be  
24 seen as an opportunity for organization and improvement. A basic pre-hospital system should  
25 be created by establishing a mechanism to access reliable transportation staffed with personnel  
26 who have basic life-support skills. Elsewhere, it has been shown that training lay people in the  
27 community, such as community health workers or public transportation drivers to function as  
28 pre-hospital care providers, can greatly improve the quality of emergency care.<sup>19</sup> Additionally, a  
29 standardized communication method ought to be instituted. For example, in Sierra Leone, it  
30 has been shown that equipping remote health facilities and traditional birth attendants with  
31 radio receivers linked to referral hospitals can shorten response times and reduce maternal  
32 deaths.<sup>20</sup>  
33  
34  
35  
36  
37  
38  
39  
40  
41  
42  
43  
44  
45  
46  
47  
48  
49  
50

51 Although not addressed in this study, it is likely that these findings would be similar elsewhere  
52 across sub-Saharan Africa. If this assessment is indeed generalizable, the authors believe that  
53 the development of a set of standardized packages for basic and advanced essentials of  
54  
55  
56  
57  
58  
59  
60

1  
2  
3 emergency care in low-resource settings, as well as designating *centers of excellence for*  
4  
5  
6 *advanced emergency care*, should be a priority for the WHO and other stakeholders. The  
7  
8 African Federation for Emergency Medicine has been developing consensus recommendations  
9  
10 for emergency care packages for various facility levels.<sup>21</sup>  
11  
12

13  
14  
15  
16 Our study had several limitations. Although we believe the lessons learned are representative  
17  
18 of counties in Kenya and other low-resource settings globally, our findings are not definitively  
19  
20 generalizable beyond the two counties surveyed. Furthermore, we recognize that elements of  
21  
22 our survey may have been limited by social desirability bias. Although we tried to mitigate this  
23  
24 with the confidential and voluntary nature of our survey and by explaining the purpose of our  
25  
26 study, participants may not have felt comfortable reporting problems or inadequacies in their  
27  
28 facilities. While our research staff included a local Kenyan who was present at all site visits and  
29  
30 functioned as a language and cultural ambassador, language and cultural differences may have  
31  
32 contributed to confounding variables. Furthermore, while informants were selected based on  
33  
34 their senior leadership roles and expertise with the operations of their facility, their responses  
35  
36 might not have always accurately reflected opinions of the majority of providers at the facility.  
37  
38  
39  
40  
41  
42  
43  
44  
45

46 In conclusion, with an increasing epidemic of NCDs and an increasing burden of injury and  
47  
48 trauma in low-resource areas, access to quality essential emergency and urgent care services is  
49  
50 critical for the health of surrounding communities. Our 60-facility assessment in western Kenya  
51  
52 identified significant widespread gaps in current emergency care capabilities, particularly in  
53  
54 identifying and appropriately caring for victims of trauma, acute myocardial infarction, diabetic  
55  
56  
57  
58  
59  
60



1  
2  
3 emergencies, and sepsis. There is great opportunity for development of a universally deployed  
4  
5 basic package in the essentials of emergency care, a selectively implemented package in the  
6  
7 essentials of advanced emergency care, a center of excellence for emergency care facility  
8  
9 designation scheme, and a reliable pre-hospital care transportation and communications  
10  
11 system. Additionally, the profound gap in readily available trained anesthetists requires  
12  
13 immediate attention.  
14  
15  
16  
17  
18  
19  
20  
21  
22  
23  
24  
25  
26  
27  
28  
29  
30  
31  
32  
33  
34  
35  
36  
37  
38  
39  
40  
41  
42  
43  
44  
45  
46  
47  
48  
49  
50  
51  
52  
53  
54  
55  
56  
57  
58  
59  
60

**Author contributions:**

TFB was involved in study design, implementation, analysis, and writing of the manuscript. RA was involved in study analysis and writing of the manuscript. RA was involved in study design, implementation, analysis, and writing of the manuscript. MW, DY, REA, ST, RC, and WO were involved in study design and data collection. BDN was involved in study design, implementation, analysis, and writing of the manuscript. All authors have reviewed, edited, and approved the final submission. TFB takes responsibility for the paper as a whole.

**Funding:** This work was supported by Division of Global Health and Human Rights, Massachusetts General Hospital

**Competing Interests:** None

**Data sharing statement:** No additional data available

## References

- 1 World Health Organization. Global status report on noncommunicable diseases 2010. Geneva: World Health Organization, 2010.
- 2 Peden M, McGee K, Sharma G. The injury chartbook: A graphical overview of the global burden of injuries. Geneva: World Health Organization, 2002.
- 3 Gosselin R, Spiegel D, Coughlin R, et al. Injuries: the neglected burden in developing countries. *Bulletin of the World Health Organization* 2009; **87**:246.
- 4 Mock C, Lormand JD, Goosen J, et al. Guidelines for essential trauma care. Geneva: World Health Organization, 2004.
- 5 Odhiambo FO, Beynon CM, Ogwang S, et al. Trauma-related mortality among adults in rural western Kenya: Characterising deaths using data from a health and demographic surveillance system. *PLoS ONE* 2013; **8**(11):e79840.
- 6 Ministry of Health, Government of Kenya. Guidelines for antiretroviral drug therapy in Kenya. 2011. Available at: [http://www.who.int/hiv/pub/guidelines/kenya\\_art.pdf](http://www.who.int/hiv/pub/guidelines/kenya_art.pdf). Accessed 7 May 2014.
- 7 Ministry of Public Health and Sanitation. Guidelines on management of leprosy and tuberculosis. 2009. Available at: [http://www.who.int/hiv/pub/guidelines/kenya\\_tb.pdf](http://www.who.int/hiv/pub/guidelines/kenya_tb.pdf). Accessed 7 May 2014.
- 8 Baker T, Lugazia E, Eriksen J, et al. Emergency and critical care services in Tanzania: A survey of ten hospitals. *BMC Health Services Research* 2013; **13**:140.
- 9 Wallis LA, Garach SR, Kropman A. State of emergency medicine in South Africa. *Int J Emerg Med* 2008; **1**(2):69–71.

- 1  
2  
3 10 Wen LS, Oshiomogho JI, Eluwa GI, et al. Characteristics and capabilities of emergency  
4 departments in Abuja, Nigeria. *Emerg Med J* 2012; **29**(10):798–801.  
5  
6  
7  
8 11 Wachira BW, Wallis LA, Geduld H. An analysis of the clinical practice of emergency  
9 medicine in public emergency departments in Kenya. *Emerg Med J* 2012; **29**(6):473–6.  
10  
11  
12 12 Mwaniki P, Ayieko P, Todd J, et al. Assessment of paediatric inpatient  
13 care during a multifaceted quality improvement intervention in Kenyan district  
14 hospitals: Use of prospectively collected case record data. *BMC Health Serv Res*  
15  
16  
17  
18  
19  
20  
21 2014; **14**:312.  
22  
23  
24 13 Irimu GW, Gathara D, Zurovac D, et al. Performance of health workers in the  
25 management of seriously sick children at a Kenyan tertiary hospital: Before and after a training  
26  
27  
28  
29  
30  
31 14 Commission on Revenue Allocation (2011) Kenya County Fact Sheets. Available at:  
32  
33  
34 [http://siteresources.worldbank.org/INTAFRICA/Resources/257994-1335471959878/  
35 Kenya\\_County\\_Fact\\_Sheets\\_Dec2011.pdf](http://siteresources.worldbank.org/INTAFRICA/Resources/257994-1335471959878/Kenya_County_Fact_Sheets_Dec2011.pdf). Accessed 7 May 2014.  
36  
37  
38 15 Commission on Revenue Allocation (2011) Kenya County Fact Sheets. Available at:  
39  
40  
41  
42 [http://siteresources.worldbank.org/INTAFRICA/Resources/257994-1335471959878/  
43 Kenya\\_County\\_Fact\\_Sheets\\_Dec2011.pdf](http://siteresources.worldbank.org/INTAFRICA/Resources/257994-1335471959878/Kenya_County_Fact_Sheets_Dec2011.pdf). Accessed 7 May 2014.  
44  
45  
46 16 Luoma M, Doherty J, Muchiri S, et al. August 2010. *Kenya Health System Assessment*  
47  
48  
49 2010. Bethesda, MD: Health Systems 20/20 project, Abt Associates Inc.  
50  
51 17 World Health Organization. Guidelines for essential trauma care. Geneva, World Health  
52  
53  
54  
55  
56  
57  
58  
59  
60  
Organization, 2004.

1  
2  
3 18 Razzak JA, Hyder AA, Akhtar T, et al. Assessing emergency medical care in low-income  
4 countries: A pilot study from Pakistan. *BMC Emergency Medicine* 2008; **8**:8.  
5  
6

7  
8 19 Mock CN, Tiska M, Adu-Ampofo M, et al. Improvements in prehospital trauma care in an  
9 African country with no formal emergency medical services. *J Trauma* 2002; **53**(1): 90–7.  
10  
11

12  
13 20 Samai O, Senegeh P. Facilitating emergency obstetrical care through transportation and  
14 communication, Bo, Sierra Leone. *International Journal of Gynecology and Obstetrics* 1997; 59  
15  
16  
17  
18  
19  
20  
21  
22  
23  
24  
25  
26  
27  
28  
29  
30  
31  
32  
33  
34  
35  
36  
37  
38  
39  
40  
41  
42  
43  
44  
45  
46  
47  
48  
49  
50  
51  
52  
53  
54  
55  
56  
57  
58  
59  
60  
Suppl **2**:S157–64.

21 Calvello E, Reynolds T, Hirshon JM, et al. Emergency care in sub-Saharan Africa: Results  
22 of a consensus conference. *African Journal of Emergency Medicine* 2013; **3**(1): 42–8.  
23  
24  
25  
26  
27  
28  
29  
30  
31  
32  
33  
34  
35  
36  
37  
38  
39  
40  
41  
42  
43  
44  
45  
46  
47  
48  
49  
50  
51  
52  
53  
54  
55  
56  
57  
58  
59  
60

**Table 1: Description of levels of care in Kenya**

|         |                          |                                                                                                                                                                                                                                                                                                                                                                                                                                                                    |
|---------|--------------------------|--------------------------------------------------------------------------------------------------------------------------------------------------------------------------------------------------------------------------------------------------------------------------------------------------------------------------------------------------------------------------------------------------------------------------------------------------------------------|
| Level 1 | Community                | <ul style="list-style-type: none"> <li>- Care outside facility in households, communities, and villages</li> <li>- Maximum population served: 5,000</li> </ul>                                                                                                                                                                                                                                                                                                     |
| Level 2 | Dispensaries/<br>Clinics | <ul style="list-style-type: none"> <li>- Has limited staff (nurses, public health technicians, and assistants)</li> <li>- Responsible for community engagement through curative, promotive, preventive, and rehabilitative care at a basic level</li> <li>- Up to four beds for observation</li> <li>- Maximum population served: 10,000(rural) - 15,000(urban)</li> </ul>                                                                                         |
| Level 3 | Health<br>Centers        | <ul style="list-style-type: none"> <li>- Staffed by nurses, clinical officers, and occasionally doctors</li> <li>- Wider range of curative and preventive services than Level 2</li> <li>- Provide minor surgical services, like incision and drainage</li> <li>- Basic emergency preparedness</li> <li>- 12-49 beds</li> <li>- Maximum population served: 30,000-40,000</li> </ul>                                                                                |
| Level 4 | Primary<br>Hospitals     | <ul style="list-style-type: none"> <li>- Provide referral level outpatient care, curative and preventive care, surgical treatment techniques, and comprehensive emergency services</li> <li>- Provide clinical services in obstetrics and gynecology, child health, medicine, and surgery and anesthesia</li> <li>- Inpatient care and 24-hour service</li> <li>- Minimum 50 beds</li> <li>- Maximum population served: 100,000(rural) - 200,000(urban)</li> </ul> |

|           |                                     |                                                                                                                                                                                                                                                                                                                                                                                                                                                 |
|-----------|-------------------------------------|-------------------------------------------------------------------------------------------------------------------------------------------------------------------------------------------------------------------------------------------------------------------------------------------------------------------------------------------------------------------------------------------------------------------------------------------------|
| Level 5-6 | Secondary/<br>Tertiary<br>Hospitals | <ul style="list-style-type: none"><li>- Higher concentration of resources and personnel (medical professionals, nurses, and midwives)</li><li>- Provide clinical services in medicine, general surgery and anesthesia, pediatrics, and obstetrics/gynecology, dental, psychiatry, comprehensive accident and emergency, ENT, ophthalmology, dermatology, ICU</li><li>- Minimum 50 beds</li><li>- Maximum population served: 1,000,000</li></ul> |
|-----------|-------------------------------------|-------------------------------------------------------------------------------------------------------------------------------------------------------------------------------------------------------------------------------------------------------------------------------------------------------------------------------------------------------------------------------------------------------------------------------------------------|

**Table 2: Health facilities studied in Kisumu and Siaya counties in Kenya; November 2013-  
January 2014**

| Type of Health Facility            | Kisumu    | Siaya     | Total     |
|------------------------------------|-----------|-----------|-----------|
| Dispensary/Health Clinic (Level 2) | 9         | 12        | <b>21</b> |
| Health Center (Level 3)            | 6         | 3         | <b>9</b>  |
| Primary Hospitals (Level 4)        | 18        | 6         | <b>25</b> |
| Secondary Hospitals (Level 5)      | 4         | 1         | <b>5</b>  |
| <b>Total</b>                       | <b>38</b> | <b>22</b> | <b>60</b> |



**Table 3: Functioning supplies and equipment at health facilities in Kisumu and Siaya, Kenya**  
(number of facilities)

|                                | <b>Level 2</b><br>n=21 (%) | <b>Level 3</b><br>n=9 (%) | <b>Level 4</b><br>n=25 (%) | <b>Level 5</b><br>n=5 (%) | <b>Total</b><br>n=60 (%) |
|--------------------------------|----------------------------|---------------------------|----------------------------|---------------------------|--------------------------|
| <b>General</b>                 |                            |                           |                            |                           |                          |
| Gloves                         | 20 (95)                    | 7 (78)                    | 24 (96)                    | 5 (100)                   | 56 (93)                  |
| Face masks                     | 10 (48)                    | 4 (44)                    | 21 (84)                    | 5 (100)                   | 40 (67)                  |
| Gowns                          | 3 (14)                     | 4 (44)                    | 17 (68)                    | 5 (100)                   | 29 (48)                  |
| Monitored beds                 | NA                         | NA                        | 1 (4)                      | 4 (80)                    | 6 (10)                   |
| Central line kits              | NA                         | NA                        | 1 (4)                      | 4 (80)                    | 5 (8)                    |
| Suction                        | 5 (24)                     | 4 (44)                    | 19 (76)                    | 4 (80)                    | 32 (53)                  |
| Blood pressure cuffs           | 18 (86)                    | 6 (67)                    | 23 (92)                    | 5 (100)                   | 52 (87)                  |
| Splint/cast supplies           | 2 (10)                     | 1 (11)                    | 14 (56)                    | 4 (80)                    | 21 (35)                  |
| Suture and wound-care supplies | 18 (86)                    | 8 (89)                    | 23 (92)                    | 5 (100)                   | 54 (90)                  |
| Defibrillator                  | 1 (5)                      | 0 (0)                     | 1 (4)                      | 3 (60)                    | 5 (8)                    |
| Back-up power                  | 1 (5)                      | 2 (22)                    | 14 (56)                    | 5 (100)                   | 22 (42)                  |
| Chest tube trays               | 1 (5)                      | 1 (11)                    | 3 (12)                     | 5 (100)                   | 10 (17)                  |

|                                 |         |        |         |         |         |
|---------------------------------|---------|--------|---------|---------|---------|
| <b>Laboratory/Diagnostics</b>   |         |        |         |         |         |
| Ultrasound                      | 1 (5)   | 0 (0)  | 9 (36)  | 5 (100) | 15 (25) |
| ECG                             | 0 (0)   | 1 (11) | 3 (12)  | 3 (60)  | 8 (13)  |
| X-ray                           | 1 (5)   | 0 (0)  | 12 (48) | 5 (100) | 18 (30) |
| Otoscope                        | 5 (24)  | 4 (44) | 14 (56) | 5 (100) | 28 (47) |
| Ophthalmoscope                  | 4 (19)  | 4 (44) | 13 (52) | 5 (100) | 26 (43) |
| Glucometer                      | 3 (14)  | 3 (33) | 23 (92) | 5 (100) | 34 (57) |
| <b>Medications</b>              |         |        |         |         |         |
| Nitroglycerin                   | 0 (0)   | 1 (11) | 4 (16)  | 2 (40)  | 7 (12)  |
| Antibiotics                     | 16 (76) | 8 (89) | 22 (88) | 5 (100) | 51 (85) |
| Opiates                         | 0 (0)   | 0 (0)  | 10 (40) | 5 (100) | 15 (25) |
| Insulin                         | 4 (19)  | 1 (11) | 19 (76) | 5 (100) | 29 (48) |
| Pressors                        | NA      | NA     | 23 (92) | 5 (100) | 48 (80) |
| General and regional anesthesia | NA      | NA     | 8 (32)  | 5 (100) | 13 (22) |
| <b>Airway/Breathing</b>         |         |        |         |         |         |
| Oxygen                          | 5 (24)  | 2 (22) | 20 (80) | 5 (100) | 32 (53) |

|                      |        |        |         |         |         |
|----------------------|--------|--------|---------|---------|---------|
| CPAP/BPAP<br>machine | NA     | NA     | 0 (0)   | 1 (20)  | 1 (2)   |
| Ambubag              | 8 (38) | 1 (11) | 20 (80) | 5 (100) | 34 (57) |
| Intubation supplies  | 2 (10) | 4 (44) | 12 (48) | 5 (100) | 23 (38) |

For peer review only

1  
2  
3 **Emergency and urgent care capacity in a resource-limited setting: an assessment of health**  
4  
5 **facilities in western Kenya**  
6  
7  
8  
9

10  
11 **Authors and affiliations**  
12

13 Thomas F. Burke, MD <sup>a, b, c</sup>  
14

15 Rosemary Hines <sup>a</sup>  
16

17 Roy Ahn, MPH, ScD <sup>a, b, c</sup>  
18

19 Michelle Walters <sup>a</sup>  
20

21 David Young, MD <sup>a</sup>  
22

23 Rachel Eleanor Anderson, MD <sup>a</sup>  
24

25 Sabrina Tom, MD <sup>a</sup>  
26

27 Rachel Clark <sup>a</sup>  
28

29 Walter Obita, MD <sup>c</sup>  
30

31 Brett D. Nelson, MD, MPH <sup>a, b, c</sup>  
32  
33  
34  
35

36  
37  
38  
39  
40  
41 a. Division of Global Health and Human Rights, Department of Emergency Medicine,  
42  
43 Massachusetts General Hospital, Zero Emerson Place, Suite 104, Boston, MA 02114, USA  
44

45  
46 b. Harvard Medical School, 25 Shattuck St, Boston, MA 02115, USA  
47

48  
49 c. Sagam Community Hospital, Siaya Road, Luanda 50307, Kenya  
50

51  
52  
53 **Corresponding author:**  
54

55  
56 Thomas F. Burke, MD, FACEP, FRSM  
57  
58  
59  
60

1  
2  
3 Division of Global Health and Human Rights, Massachusetts General Hospital

4  
5  
6 Zero Emerson Place, Suite 104, Boston, MA 02114, USA

7  
8 E-mail [tfburke@partners.org](mailto:tfburke@partners.org)

9  
10  
11 Phone +1-617-584-0064

12  
13  
14  
15  
16 **Funding:**

17  
18 This research received no specific grant from any funding agency in the public, commercial, or  
19 not-for-profit sectors. This study was funded internally and by in-kind donation by the authors'  
20  
21  
22  
23  
24 Division of Global Health and Human Rights at Massachusetts General Hospital.

25  
26  
27  
28 **Competing interests:**

29  
30  
31 All of the authors have been formally queried, and no authors have competing interests with  
32  
33  
34 this study.

35  
36  
37  
38 **Data sharing statement:** Extra data are available by emailing [tfburke@partners.org](mailto:tfburke@partners.org).

39  
40  
41  
42  
43 **Author contributions:**

44  
45  
46 TFB was involved in study design, implementation, analysis, and writing of the manuscript. RA  
47  
48 was involved in study analysis and writing of the manuscript. RA was involved in study design,  
49  
50 implementation, analysis, and writing of the manuscript. MW, DY, REA, ST, RC, and WO were  
51  
52  
53  
54 involved in study design and data collection. BDN was involved in study design,

1  
2  
3 implementation, analysis, and writing of the manuscript. All authors have reviewed, edited, and  
4  
5 approved the final submission. TFB takes responsibility for the paper as a whole.  
6  
7  
8  
9

10  
11 **Word count:**

12  
13 | 2,9~~5319~~ words  
14  
15  
16  
17

18  
19 **Keywords:**

20  
21 Emergency medicine  
22

23  
24 Urgent care  
25

26  
27 Capacity assessment  
28

29  
30 Kenya  
31

32  
33 Pre-hospital care  
34  
35  
36  
37  
38  
39  
40  
41  
42  
43  
44  
45  
46  
47  
48  
49  
50  
51  
52  
53  
54  
55  
56  
57  
58  
59  
60

## Abstract

**Objective:** Injuries, trauma, and non-communicable diseases are responsible for a rising proportion of death and disability in low- and middle-income countries. Delivering effective emergency and urgent health care for these and other conditions in resource-limited settings is challenging. In this study, we sought to ~~understand~~ examine and characterize emergency and urgent care capacity in a resource-limited setting.

**Methods:** We conducted an assessment in western Kenya within all 30 primary and secondary hospitals and within a stratified random sampling of 30 dispensaries and health centers. Key informants were the most senior facility health care provider and manager available. Emergency physician researchers utilized a semi-structured assessment tool, and data were analyzed using descriptive statistics and thematic coding.

**Results:** No lower-level facilities and 30% of higher-level facilities reported having a defined, organized approach to trauma. Forty-three percent of higher-level facilities have access to an anesthetist. The majority of lower-level facilities have suture and wound care supplies and gloves but typically lack other basic trauma supplies. For cardiac care, 50% of higher-level facilities have morphine, but a minority have functioning ECG, sublingual nitroglycerin, or defibrillator. Only 20% of lower-level facilities have glucometers, and only 33% of higher-level facilities can care for diabetic emergencies. No facilities have sepsis clinical guidelines.

**Conclusions:** Large gaps in essential emergency care capabilities were identified at all facility levels in western Kenya. There is great opportunity for a universally deployed basic emergency care package, advanced emergency care package and facility designation scheme, and reliable pre-hospital care transportation and communications system for resource-limited settings.

**Strengths and limitations of this study:**

- This assessment was completed within all 30 primary and secondary hospitals and a stratified random sampling of 30 dispensaries and health centers in western Kenya
- Semi-structured interviews were conducted among facility leadership to ~~understand~~ examine and characterize emergency and urgent care capacity in this resource-limited setting
- Large gaps at all facility levels were identified in essential care capabilities
- There is great opportunity for a universally deployed basic emergency care package, advanced emergency care package and facility designation scheme, and reliable pre-hospital care transportation and communications system for resource-limited settings.
- The study may not be generalizable outside of this region.



## Introduction

### *Background and importance*

Providing effective emergency and urgent care is a considerable challenge in low- and middle-income countries. Difficulties exist with regard to transportation, communications, equipment, facility infrastructure, medication supply lines, affordability, and availability of skilled health care providers. Historically, infections caused by communicable diseases have been the major contributors to morbidity and mortality in resource-limited settings. However, traumatic injuries and non-communicable diseases (NCDs), such as heart disease and cancer, are rising rapidly and have recently become recognized as significant contributors to the burden of disease in developing countries. Eighty percent of all NCD deaths in 2008 (29 million) occurred in low- and middle-income countries, with cardiovascular disease, cancers, and respiratory disease the leading causes.<sup>1</sup> Furthermore, 16,000 people die globally each day from injuries alone, accounting for over 15% of the global burden of disease. Approximately 90% of these injuries occur in low- and middle-income countries.<sup>2-4</sup>

Kenya is facing an epidemic of NCDs and an increasing burden of injury and trauma. Between 2003 and 2008, the proportion of deaths related to trauma in western Kenya increased from 2.5% to 5.9%, with road traffic accidents (RTA) the leading cause.<sup>5</sup> In the past, most Kenya public health programs focused on communicable diseases. As a consequence, Kenya has developed disease-specific clinical guidelines for HIV/AIDS, malaria, tuberculosis, and other communicable diseases, but there are currently no national guidelines for emergency care.<sup>6,7</sup> As rates of NCDs and trauma-related injuries and deaths increase, there is a growing urgency to

1  
2  
3 provide adequate and organized treatment for time-sensitive illnesses and injuries, such as  
4  
5 acute myocardial infarction, stroke, trauma, and sepsis.  
6  
7  
8  
9

10 Recent assessments performed in a select group of facilities in Nigeria, South Africa, and  
11  
12 Tanzania documented emergency and critical care services in terms of resources, routines, and  
13  
14 guidelines, while a small-scale evaluation of public emergency departments in Kenya described  
15  
16 the most common diagnoses of presenting patients.<sup>8-11</sup> [Other facility-level studies in Kenya](#)  
17  
18 [have assessed inpatient care.](#)<sup>12,13</sup> [However, no](#) assessment of the emergency care capabilities  
19  
20 across a region in Kenya has ever been published.  
21  
22  
23  
24  
25  
26  
27

### 28 *Goals of this investigation*

29  
30 The Division of Global Health and Human Rights in the Department of Emergency Medicine at  
31  
32 the Massachusetts General Hospital was approached by the Kenyan Ministry of Health and  
33  
34 asked to assess the emergency and urgent health care capabilities across all levels of facilities in  
35  
36 Kisumu and Siaya counties of western Kenya. This paper reports major findings from this  
37  
38 assessment.  
39  
40  
41  
42  
43  
44  
45

### 46 *Health care provision in Kenya*

47  
48 Kenya has 6,626 health facilities across 47 counties, serving a population of over 43 million  
49  
50 people. Kisumu and Siaya counties have populations of 968,909 (52% urban) and 842,304 (11%  
51  
52 urban), respectively.<sup>142,153</sup> There are a total of 150 health facilities in Kisumu (92 public, 15 non-  
53  
54 governmental, 15 faith-based, and 28 private) and a total of 162 health facilities in Siaya (115  
55  
56  
57  
58  
59  
60

1  
2  
3 public, 7 non-governmental, 17 faith-based, and 23 private). The Kenya Essential Package for  
4  
5 Health (KEPH) defines the levels of care in Kenya: Level 1 for community-administered care and  
6  
7 Levels 2-6 for health care facilities (Table 1).<sup>164</sup> Levels 2, 3, 4, 5, and 6 represent dispensaries  
8  
9 and clinics, health centers, primary hospitals, secondary hospitals, and tertiary hospitals,  
10  
11 respectively.  
12  
13  
14  
15  
16  
17  
18

## 19 **Methods**

### 20 *Study design and setting*

21  
22 This facility-based emergency care capabilities assessment was conducted between November  
23  
24 1, 2013 and January 20, 2014, in Kisumu and Siaya counties in western Kenya. All 30 Level 4 and  
25  
26 5 facilities in the two counties (there are no Level 6 facilities in these counties) were selected  
27  
28 for assessment. Selection of 30 additional facilities occurred via randomized stratified sampling  
29  
30 of each additional type of facility – dispensary, health center, and health clinic. The criterion for  
31  
32 inclusion was an open fully functioning health care facility currently providing health services;  
33  
34 there were no restrictions based on geography or accessibility.  
35  
36  
37  
38  
39  
40  
41  
42  
43

### 44 *Methods and measurements*

45  
46 This facility-based emergency care capabilities assessment utilized semi-structured, key-  
47  
48 informant interviews using a data collection instrument designed by the study authors. The key  
49  
50 informants were the most senior institution staff members identified during the day of the  
51  
52 assessment – typically the chief medical officer and/or senior administrator. The assessment  
53  
54 tool drew from existing models of facility assessment in South Africa, Pakistan, and Tanzania, as  
55  
56  
57  
58  
59  
60

1  
2  
3 well as the WHO Guidelines for Essential Trauma Care.<sup>9,10,175,186</sup> The assessment tool was  
4  
5  
6 refined by expert consultation with the team's emergency physicians and public health  
7  
8 epidemiologists, and covered eight domains: facility demographics, referral services, personnel,  
9  
10 economics, supplies and laboratory, trauma, critical care, and anesthesia. The interviews  
11  
12 consisted of open-response questions related to health care services, most common conditions  
13  
14 of patients presenting for care, provider capabilities, equipment, supplies, and medications.  
15  
16 Qualitative questions pertained to attitudes and perceptions related to provider morale,  
17  
18 cooperation and communication between referring and receiving health facilities, and  
19  
20 recommendations for continuing education and referral services.  
21  
22  
23  
24  
25  
26  
27

28 The key-informant interviews were conducted by our field research team – consisting at all  
29  
30 times of at least one emergency physician and one research assistant. Three different  
31  
32 emergency physicians were involved throughout the data collection process. The delivery of  
33  
34 questions and interview structure were discussed *a priori* by all three physician interviewers in  
35  
36 order to standardize the interview process. Participants were provided an overview of the  
37  
38 project, and the voluntary and confidential nature of the assessment was described. All  
39  
40 participants gave verbal consent prior to participation.  
41  
42  
43  
44  
45  
46  
47

#### 48 *Analysis*

49  
50 Data were analyzed using standard descriptive and frequency analyses, utilizing Microsoft Excel  
51  
52 2007 (Seattle, WA, USA). Qualitative research methods involved thematic analysis of interviews  
53  
54 in order to best understand emergent findings.  
55  
56  
57  
58  
59  
60

### *Ethical review and funding*

This study was reviewed and approved by the Institutional Review Board of Partners Healthcare (Boston, MA, USA) and the Ministry of Health of Kenya. This research received no specific grant from any funding agency in the public, commercial, or not-for-profit sectors.

## **Results**

A key informant at each of the 60 facilities was surveyed between November 1, 2013 and January 20, 2014. The facility sites were a mix of dispensaries/health clinics, health centers, primary hospitals, and secondary hospitals, as shown in Table 2. (There are no tertiary hospitals in Kisumu or Siaya County.) The 60 key informants comprised 10 chief medical officers (all at the hospital level), 39 nurse managers (facility matron), and 11 lead clinical officers.

### ***Level 2 and 3 Facilities***

#### *Common Conditions*

Key informants were asked to list the 10 most common emergent and urgent conditions presenting to their health facility. The most frequently reported conditions at Level 2 and 3 facilities were (in rank order) malaria (30/30, 100%), diarrhea (26/30, 87%), upper respiratory infections (24/30, 80%), skin infections (18/30, 60%), sexually transmitted infections (15/30, 50%), pneumonia (14/30, 47%), and RTAs/trauma (9/30, 30%).

#### *Trauma and Injury*

1  
2  
3 When asked if their Level 2 and 3 facilities have a specific approach to a trauma patient that  
4 differs from how they approach a medical patient, 0% of key informants answered in the  
5 affirmative. In response to how well respondents felt their facility can handle major trauma, all  
6 30 said they refer. Twenty-six (87%) of the 30 said they refer immediately, and four (13%) said  
7 they try to provide first aid then refer. The majority of providers (21/30, 70%) said their facility  
8 is poorly equipped to handle a broken bone.  
9  
10  
11  
12  
13  
14  
15  
16  
17  
18  
19  
20

21 The majority of Level 2 and 3 facilities have suture and wound care supplies (26/30, 87%) and  
22 gloves (27/30, 90%) (Table 3). Few of these facilities have oxygen (7/30, 23%) and  
23 splinting/casting supplies (3/30, 10%), and none have blood for transfusion (0/30, 0%).  
24  
25  
26  
27  
28  
29  
30

### 31 *Critical Care*

32  
33 When asked about the standard procedure for treating someone with a possible heart attack,  
34 all 30 providers at Level 2 and 3 facilities reported that their facility refers. Eighteen (60%) of  
35 the 30 reported referring patients immediately, eight (27%) said they treat symptoms (e.g.,  
36 painkillers, oxygen) and then refer, and four (13%) said they check vitals and then refer. Of the  
37 30 Level 2 and 3 facilities, one has sublingual nitroglycerin.  
38  
39  
40  
41  
42  
43  
44  
45  
46  
47  
48

49 The majority of providers (29/30, 93%) at the lower-level facilities said that their facility is ill-  
50 prepared to handle possible diabetic ketoacidosis (DKA) and must refer all cases. Overall, six  
51 (20%) Level 2 and 3 facilities have a glucometer and five (17%) have insulin.  
52  
53  
54  
55  
56  
57  
58  
59  
60

1  
2  
3 In regards to a standard procedure for cases of possible sepsis, fifteen (50%) of the 30 providers  
4  
5 at Level 2 and 3 facilities said they refer, 11 (37%) reported providing treatment without  
6  
7 referral (e.g., antibiotics, IV fluids), and four (13%) providers said that they did not know how to  
8  
9 approach sepsis. A majority of the Level 2 and 3 facilities (24/30, 80%) have antibiotics.  
10  
11  
12

### 13 14 15 **Facility Levels 4 and 5**

#### 16 17 18 *Common Conditions*

19  
20 The most frequently reported presenting emergent and urgent conditions at Level 4 and 5  
21  
22 facilities were similar to those at Level 2 and 3 facilities. They are (in rank order): malaria  
23  
24 (30/30, 100%), diarrhea (22/30, 73%), sexually transmitted infections (21/30, 70%), pneumonia  
25  
26 (21/30, 70%), RTAs/trauma (18/30, 60%), and upper respiratory infections (16/30, 53%).  
27  
28  
29  
30

#### 31 32 33 *Trauma and Injury*

34  
35 Nine (30%) providers at Level 4 and 5 facilities reported that their facility has an organized  
36  
37 approach to trauma (e.g., emergency team with assembly point). When asked if they are  
38  
39 notified in advance of patients arriving to the hospital, four (13%) answered in the affirmative.  
40  
41  
42

43  
44 In review of basic trauma supplies in Level 4 and 5 facilities, 97% have gloves, 93% have suture  
45  
46 and wound care materials, and 83% have oxygen. All five of the Level 5 facilities have chest  
47  
48 tubes and x-ray capability, and four of the five have splinting and casting supplies. Three (12%)  
49  
50 of the 25 Level 4 facilities have chest tubes and 12 (48%) have x-ray capability. Sixteen (64%) of  
51  
52 the 25 Level 4 facilities, and all five of the Level 5 facilities have blood available for transfusion.  
53  
54  
55  
56  
57  
58  
59  
60

1  
2  
3  
4 Seventeen (57%) providers at Level 4 and 5 facilities reported that their facility does not have  
5  
6 access to a trained provider that can administer general or regional anesthesia.  
7  
8  
9

### 10 *Critical Care*

11  
12  
13 When asked about diagnosis and treatment of someone presenting with a possible acute  
14  
15 myocardial infarction (AMI), 20 (80%) of 25 providers at level 4 hospitals reported that their  
16  
17 facility refers; 11 (44%) reported that their facility stabilizes (e.g., oxygen or first aid) and then  
18  
19 refers, and nine (30%) providers reported that their facility refers immediately. Five (20%)  
20  
21 providers at Level 4 facilities reported that their facility provides diagnostic and treatment  
22  
23 services without referral (e.g., ACE inhibitors, beta blockers, or aspirin). All 5 Level 5 facilities  
24  
25 reported giving oxygen to suspected AMI patients, while three reported providing aspirin, two  
26  
27 reported providing morphine and one reported providing epinephrine. Several of the Level 4  
28  
29 and 5 facilities were lacking in supplies and equipment to manage cardiac emergencies. Fifteen  
30  
31 (50%) facilities have morphine, six (20%) have a functioning ECG machine, six (20%) have  
32  
33 nitroglycerin, and four (13%) have a defibrillator.  
34  
35  
36  
37  
38  
39  
40  
41  
42

43  
44 Ten (33%) of 30 providers at Level 4 and 5 facilities reported that their facility is well-prepared  
45  
46 to manage DKA. A majority of Level 4 and 5 facilities have a glucometer (28/30, 93%) and  
47  
48 insulin (24/30, 80%).  
49  
50  
51  
52

53  
54 When asked about a standard procedure for cases of sepsis, the vast majority (29/30, 97%) of  
55  
56 Level 4 and 5 facilities reported providing some treatment for sepsis (e.g., antibiotics, IV fluids),  
57  
58  
59  
60



1  
2  
3 but none had standardized clinical care guidelines. Twenty-three (92%) of the 25 Level 4 and all  
4  
5 five of the Level 5 facilities have vasopressor agents. Twenty-two (88%) of the 25 Level 4 and all  
6  
7 five of the Level 5 facilities have antibiotics.  
8  
9

## 10 11 12 13 **Discussion**

14  
15  
16 With an increasing number of NCDs, RTAs, and other time-sensitive illnesses and injuries, the  
17  
18 provision of emergency care in low-and middle-income countries is taking on increasing  
19  
20 importance. Our study illustrates that essential emergency and urgent care is severely lacking in  
21  
22 western Kenya. Limited communication, infrastructure, supplies, and properly trained human  
23  
24 resources all negatively impact the ability to deliver quality emergency and urgent health care.  
25  
26  
27  
28  
29

30  
31 Although by definition Level 2 and Level 3 facilities in Kenya are not designed nor expected to  
32  
33 provide comprehensive care for acutely ill patients, we elected to study their capabilities  
34  
35 around emergency care since community members often present to them with acute life-  
36  
37 threatening illnesses and injuries. We discovered that virtually all of the 30 Level 2 and 3  
38  
39 facilities we studied were unable to respond to the essential needs of patients presenting with  
40  
41 acute trauma, a possible heart attack, diabetic emergencies, or sepsis. Most facilities reported  
42  
43 transferring patients without even basic assessments or interventions. Few facilities had any  
44  
45 organized approach in transferring a patient or notifying the receiving facility.  
46  
47  
48  
49  
50

51  
52  
53 The authors view the Level 2 and 3 facility findings as a compelling call to action for the  
54  
55 development of a contextually appropriate, standardized basic level training and materials  
56  
57  
58  
59  
60

1  
2  
3 package for emergency care. For example, a training program in the essentials of emergency  
4  
5 care for Level 2 and 3 facilities should include the development of a standard approach to all  
6  
7 acute care patients: basic assessment and intervention of airway, breathing, and circulation;  
8  
9 taking and interpreting vital signs; methodical total body assessment; hemorrhage control;  
10  
11 immobilization and splinting of potential injuries; capabilities of providing basic high-impact  
12  
13 diagnostics and interventions (e.g., point-of-care glucose, ECG, aspirin, antibiotics, splints); and  
14  
15 a pre-established reliable and rapid referral and notification plan.  
16  
17  
18  
19  
20  
21  
22

23 While emergent and urgent conditions present frequently to Level 4 and 5 facilities, we  
24  
25 discovered that the hospitals' capabilities varied considerably. While all of the 30 facilities had  
26  
27 gaps across each of the domains we studied, many of the gaps at the Level 4 facilities were  
28  
29 quite profound. Overall, some of the more salient findings in the Level 4 and 5 facilities'  
30  
31 assessments were: 70% do not have a standardized approach to trauma, few have the basic  
32  
33 materials necessary to manage trauma (e.g. chest tube, blood), less than half have a functioning  
34  
35 x-ray machine, less than half (43%) of the operating theatres have access to an anesthetist, only  
36  
37 six of 30 have EKG machines or nitroglycerin, most do not give aspirin for heart attacks, few are  
38  
39 able to provide care for DKA, and no facility had a standardized approach to sepsis.  
40  
41  
42  
43  
44  
45  
46  
47  
48

49 The findings from our Level 4 and Level 5 facility assessment demonstrate an urgent need for a  
50  
51 system-wide intervention, targeting the unmet higher-level facility needs of the acutely ill and  
52  
53 injured. Many of the Level 4 and 5 facilities do not meet the most basic standard for the  
54  
55 essentials of emergency care delivery that we believe can – and should – be universally  
56  
57  
58  
59  
60

1  
2  
3 implemented at all lower-level facilities. We propose that in addition to every facility being  
4 brought up to the basic level, a second package in essentials of advanced emergency care  
5 should be developed and deployed to select Level 4 and 5 facilities. These selected facilities,  
6 once meeting standards for training, materials, and infrastructure, should then be designated  
7 and widely recognized and supported as *centers of excellence for advanced emergency care*,  
8 and thereby capable of providing quality assessment and initial stabilization of all emergent and  
9 urgent conditions.  
10  
11  
12  
13  
14  
15  
16  
17  
18  
19  
20  
21  
22

23 Access to quality pre-hospital care services was universally poor in our study sample and can be  
24 seen as an opportunity for organization and improvement. A basic pre-hospital system should  
25 be created by establishing a mechanism to access reliable transportation staffed with personnel  
26 who have basic life-support skills. Elsewhere, it has been shown that training lay people in the  
27 community, such as community health workers or public transportation drivers to function as  
28 pre-hospital care providers, can greatly improve the quality of emergency care.<sup>197</sup> Additionally,  
29 a standardized communication method ought to be instituted. For example, in Sierra Leone, it  
30 has been shown that equipping remote health facilities and traditional birth attendants with  
31 radio receivers linked to referral hospitals can shorten response times and reduce maternal  
32 deaths.<sup>2018</sup>  
33  
34  
35  
36  
37  
38  
39  
40  
41  
42  
43  
44  
45  
46  
47  
48  
49  
50

51 Although not addressed in this study, it is likely that these findings would be similar elsewhere  
52 across sub-Saharan Africa. If this assessment is indeed generalizable, the authors believe that  
53 the development of a set of standardized packages for basic and advanced essentials of  
54  
55  
56  
57  
58  
59  
60

1  
2  
3 emergency care in low-resource settings, as well as designating *centers of excellence for*  
4  
5  
6 *advanced emergency care*, should be a priority for the WHO and other stakeholders. The  
7  
8 African Federation for Emergency Medicine has been developing consensus recommendations  
9  
10 for emergency care packages for various facility levels.<sup>21</sup>  
11  
12

13  
14  
15  
16 Our study had several limitations. Although we believe the lessons learned are representative  
17  
18 of counties in Kenya and other low-resource settings globally, our findings are not definitively  
19  
20 generalizable beyond the two counties surveyed. Furthermore, we recognize that elements of  
21  
22 our survey may have been limited by social desirability bias. Although we tried to mitigate this  
23  
24 with the ~~anonymous~~ confidential and voluntary nature of our survey and by explaining the  
25  
26 purpose of our study, participants may not have felt comfortable reporting problems or  
27  
28 inadequacies in their facilities. While our research staff included a local Kenyan who was  
29  
30 present at all site visits and functioned as a language and cultural ambassador, language and  
31  
32 cultural differences may have contributed to confounding variables. Furthermore, while  
33  
34 informants were selected based on their senior leadership roles and expertise with the  
35  
36 operations of their facility, their responses might not have always accurately reflected opinions  
37  
38 of the majority of providers at the facility.  
39  
40  
41  
42  
43  
44  
45  
46  
47  
48

49 In conclusion, with an increasing epidemic of NCDs and an increasing burden of injury and  
50  
51 trauma in low-resource areas, access to quality essential emergency and urgent care services is  
52  
53 critical for the health of surrounding communities. Our 60-facility assessment in western Kenya  
54  
55 identified significant widespread gaps in current emergency care capabilities, particularly in  
56  
57  
58  
59  
60

1  
2  
3 identifying and appropriately caring for victims of trauma, acute myocardial infarction, diabetic  
4 emergencies, and sepsis. There is great opportunity for development of a universally deployed  
5  
6 basic package in the essentials of emergency care, a selectively implemented package in the  
7  
8 essentials of advanced emergency care, a center of excellence for emergency care facility  
9  
10 designation scheme, and a reliable pre-hospital care transportation and communications  
11  
12 system. Additionally, the profound gap in readily available trained anesthetists requires  
13  
14 immediate attention.  
15  
16  
17  
18  
19  
20  
21  
22  
23  
24  
25  
26  
27  
28  
29  
30  
31  
32  
33  
34  
35  
36  
37  
38  
39  
40  
41  
42  
43  
44  
45  
46  
47  
48  
49  
50  
51  
52  
53  
54  
55  
56  
57  
58  
59  
60

**Table 1: Description of levels of care in Kenya**

|         |                          |                                                                                                                                                                                                                                                                                                                                                                                                                                                                    |
|---------|--------------------------|--------------------------------------------------------------------------------------------------------------------------------------------------------------------------------------------------------------------------------------------------------------------------------------------------------------------------------------------------------------------------------------------------------------------------------------------------------------------|
| Level 1 | Community                | <ul style="list-style-type: none"> <li>- Care outside facility in households, communities, and villages</li> <li>- Maximum population served: 5,000</li> </ul>                                                                                                                                                                                                                                                                                                     |
| Level 2 | Dispensaries/<br>Clinics | <ul style="list-style-type: none"> <li>- Has limited staff (nurses, public health technicians, and assistants)</li> <li>- Responsible for community engagement through curative, promotive, preventive, and rehabilitative care at a basic level</li> <li>- Up to four beds for observation</li> <li>- Maximum population served: 10,000(rural) - 15,000(urban)</li> </ul>                                                                                         |
| Level 3 | Health<br>Centers        | <ul style="list-style-type: none"> <li>- Staffed by nurses, clinical officers, and occasionally doctors</li> <li>- Wider range of curative and preventive services than Level 2</li> <li>- Provide minor surgical services, like incision and drainage</li> <li>- Basic emergency preparedness</li> <li>- 12-49 beds</li> <li>- Maximum population served: 30,000-40,000</li> </ul>                                                                                |
| Level 4 | Primary<br>Hospitals     | <ul style="list-style-type: none"> <li>- Provide referral level outpatient care, curative and preventive care, surgical treatment techniques, and comprehensive emergency services</li> <li>- Provide clinical services in obstetrics and gynecology, child health, medicine, and surgery and anesthesia</li> <li>- Inpatient care and 24-hour service</li> <li>- Minimum 50 beds</li> <li>- Maximum population served: 100,000(rural) - 200,000(urban)</li> </ul> |

1  
2  
3  
4  
5  
6  
7  
8  
9  
10  
11  
12  
13  
14  
15  
16  
17  
18  
19  
20  
21  
22  
23  
24  
25  
26  
27  
28  
29  
30  
31  
32  
33  
34  
35  
36  
37  
38  
39  
40  
41  
42  
43  
44  
45  
46  
47  
48  
49  
50  
51  
52  
53  
54  
55  
56  
57  
58  
59  
60

|           |                                             |                                                                                                                                                                                                                                                                                                                                                                                                                                                      |
|-----------|---------------------------------------------|------------------------------------------------------------------------------------------------------------------------------------------------------------------------------------------------------------------------------------------------------------------------------------------------------------------------------------------------------------------------------------------------------------------------------------------------------|
| Level 5-6 | Secondary/<br><br>Tertiary<br><br>Hospitals | <ul style="list-style-type: none"> <li>- Higher concentration of resources and personnel (medical professionals, nurses, and midwives)</li> <li>- Provide clinical services in medicine, general surgery and anesthesia, pediatrics, and obstetrics/gynecology, dental, psychiatry, comprehensive accident and emergency, ENT, ophthalmology, dermatology, ICU</li> <li>- Minimum 50 beds</li> <li>- Maximum population served: 1,000,000</li> </ul> |
|-----------|---------------------------------------------|------------------------------------------------------------------------------------------------------------------------------------------------------------------------------------------------------------------------------------------------------------------------------------------------------------------------------------------------------------------------------------------------------------------------------------------------------|

For peer review only

**Table 2: Health facilities studied in Kisumu and Siaya counties in Kenya; November 2013-  
January 2014**

| Type of Health Facility            | Kisumu    | Siaya     | Total     |
|------------------------------------|-----------|-----------|-----------|
| Dispensary/Health Clinic (Level 2) | 9         | 12        | <b>21</b> |
| Health Center (Level 3)            | 6         | 3         | <b>9</b>  |
| Primary Hospitals (Level 4)        | 18        | 6         | <b>25</b> |
| Secondary Hospitals (Level 5)      | 4         | 1         | <b>5</b>  |
| <b>Total</b>                       | <b>38</b> | <b>22</b> | <b>60</b> |



**Table 3: Functioning supplies and equipment at health facilities in Kisumu and Siaya, Kenya**  
(number of facilities)

|                                | <b>Level 2</b><br>n=21 (%) | <b>Level 3</b><br>n=9 (%) | <b>Level 4</b><br>n=25 (%) | <b>Level 5</b><br>n=5 (%) | <b>Total</b><br>n=60 (%) |
|--------------------------------|----------------------------|---------------------------|----------------------------|---------------------------|--------------------------|
| <b>General</b>                 |                            |                           |                            |                           |                          |
| Gloves                         | 20 (95)                    | 7 (78)                    | 24 (96)                    | 5 (100)                   | 56 (93)                  |
| Face masks                     | 10 (48)                    | 4 (44)                    | 21 (84)                    | 5 (100)                   | 40 (67)                  |
| Gowns                          | 3 (14)                     | 4 (44)                    | 17 (68)                    | 5 (100)                   | 29 (48)                  |
| Monitored beds                 | NA                         | NA                        | 1 (4)                      | 4 (80)                    | 6 (10)                   |
| Central line kits              | NA                         | NA                        | 1 (4)                      | 4 (80)                    | 5 (8)                    |
| Suction                        | 5 (24)                     | 4 (44)                    | 19 (76)                    | 4 (80)                    | 32 (53)                  |
| Blood pressure cuffs           | 18 (86)                    | 6 (67)                    | 23 (92)                    | 5 (100)                   | 52 (87)                  |
| Splint/cast supplies           | 2 (10)                     | 1 (11)                    | 14 (56)                    | 4 (80)                    | 21 (35)                  |
| Suture and wound-care supplies | 18 (86)                    | 8 (89)                    | 23 (92)                    | 5 (100)                   | 54 (90)                  |
| Defibrillator                  | 1 (5)                      | 0 (0)                     | 1 (4)                      | 3 (60)                    | 5 (8)                    |
| Back-up power                  | 1 (5)                      | 2 (22)                    | 14 (56)                    | 5 (100)                   | 22 (42)                  |
| Chest tube trays               | 1 (5)                      | 1 (11)                    | 3 (12)                     | 5 (100)                   | 10 (17)                  |

|                                     |         |        |         |         |         |
|-------------------------------------|---------|--------|---------|---------|---------|
| <b>Laboratory/Diagnos-<br/>tics</b> |         |        |         |         |         |
| Ultrasound                          | 1 (5)   | 0 (0)  | 9 (36)  | 5 (100) | 15 (25) |
| ECG                                 | 0 (0)   | 1 (11) | 3 (12)  | 3 (60)  | 8 (13)  |
| X-ray                               | 1 (5)   | 0 (0)  | 12 (48) | 5 (100) | 18 (30) |
| Otoscope                            | 5 (24)  | 4 (44) | 14 (56) | 5 (100) | 28 (47) |
| Ophthalmoscope                      | 4 (19)  | 4 (44) | 13 (52) | 5 (100) | 26 (43) |
| Glucometer                          | 3 (14)  | 3 (33) | 23 (92) | 5 (100) | 34 (57) |
| <b>Medications</b>                  |         |        |         |         |         |
| Nitroglycerin                       | 0 (0)   | 1 (11) | 4 (16)  | 2 (40)  | 7 (12)  |
| Antibiotics                         | 16 (76) | 8 (89) | 22 (88) | 5 (100) | 51 (85) |
| Opiates                             | 0 (0)   | 0 (0)  | 10 (40) | 5 (100) | 15 (25) |
| Insulin                             | 4 (19)  | 1 (11) | 19 (76) | 5 (100) | 29 (48) |
| Pressors                            | NA      | NA     | 23 (92) | 5 (100) | 48 (80) |
| General and<br>regional anesthesia  | NA      | NA     | 8 (32)  | 5 (100) | 13 (22) |
| <b>Airway/Breathing</b>             |         |        |         |         |         |
| Oxygen                              | 5 (24)  | 2 (22) | 20 (80) | 5 (100) | 32 (53) |

|                      |        |        |         |         |         |
|----------------------|--------|--------|---------|---------|---------|
| CPAP/BPAP<br>machine | NA     | NA     | 0 (0)   | 1 (20)  | 1 (2)   |
| Ambubag              | 8 (38) | 1 (11) | 20 (80) | 5 (100) | 34 (57) |
| Intubation supplies  | 2 (10) | 4 (44) | 12 (48) | 5 (100) | 23 (38) |

For peer review only

## References

- 1 World Health Organization. Global status report on noncommunicable diseases 2010. Geneva: World Health Organization, 2010.
- 2 Peden M, McGee K, Sharma G. The injury chartbook: A graphical overview of the global burden of injuries. Geneva: World Health Organization, 2002.
- 3 Gosselin R, Spiegel D, Coughlin R, et al. Injuries: the neglected burden in developing countries. *Bulletin of the World Health Organization* 2009; **87**:246.
- 4 Mock C, Lormand JD, Goosen J, et al. Guidelines for essential trauma care. Geneva: World Health Organization, 2004.
- 5 Odhiambo FO, Beynon CM, Ogwang S, et al. Trauma-related mortality among adults in rural western Kenya: Characterising deaths using data from a health and demographic surveillance system. *PLoS ONE* 2013; **8**(11):e79840.
- 6 Ministry of Health, Government of Kenya. Guidelines for antiretroviral drug therapy in Kenya. 2011. Available at: [http://www.who.int/hiv/pub/guidelines/kenya\\_art.pdf](http://www.who.int/hiv/pub/guidelines/kenya_art.pdf). Accessed 7 May 2014.
- 7 Ministry of Public Health and Sanitation. Guidelines on management of leprosy and tuberculosis. 2009. Available at: [http://www.who.int/hiv/pub/guidelines/kenya\\_tb.pdf](http://www.who.int/hiv/pub/guidelines/kenya_tb.pdf). Accessed 7 May 2014.
- 8 Baker T, Lugazia E, Eriksen J, et al. Emergency and critical care services in Tanzania: A survey of ten hospitals. *BMC Health Services Research* 2013; **13**:140.
- 9 Wallis LA, Garach SR, Kropman A. State of emergency medicine in South Africa. *Int J Emerg Med* 2008; **1**(2):69–71.

1  
2  
3  
4  
5  
6  
7  
8  
9  
10  
11  
12  
13  
14  
15  
16  
17  
18  
19  
20  
21  
22  
23  
24  
25  
26  
27  
28  
29  
30  
31  
32  
33  
34  
35  
36  
37  
38  
39  
40  
41  
42  
43  
44  
45  
46  
47  
48  
49  
50  
51  
52  
53  
54  
55  
56  
57  
58  
59  
60

10 Wen LS, Oshiomogho JI, Eluwa GI, et al. Characteristics and capabilities of emergency departments in Abuja, Nigeria. *Emerg Med J* 2012; **29**(10):798–801.

11 Wachira BW, Wallis LA, Geduld H. An analysis of the clinical practice of emergency medicine in public emergency departments in Kenya. *Emerg Med J* 2012; **29**(6):473–6.

12 Mwaniki P, Ayieko P, Todd J, et al. Assessment of paediatric inpatient care during a multifaceted quality improvement intervention in Kenyan district hospitals: Use of prospectively collected case record data. *BMC Health Serv Res* 2014; **14**:312.

13 Irimu GW, Gathara D, Zurovac D, et al. Performance of health workers in the management of seriously sick children at a Kenyan tertiary hospital: Before and after a training intervention. *PLoS One* 2012; **7**(7):e39964.

~~142~~ Commission on Revenue Allocation (2011) Kenya County Fact Sheets. Available at: [http://siteresources.worldbank.org/INTAFRICA/Resources/257994-1335471959878/Kenya\\_County\\_Fact\\_Sheets\\_Dec2011.pdf](http://siteresources.worldbank.org/INTAFRICA/Resources/257994-1335471959878/Kenya_County_Fact_Sheets_Dec2011.pdf). Accessed 7 May 2014.

~~153~~ Commission on Revenue Allocation (2011) Kenya County Fact Sheets. Available at: [http://siteresources.worldbank.org/INTAFRICA/Resources/257994-1335471959878/Kenya\\_County\\_Fact\\_Sheets\\_Dec2011.pdf](http://siteresources.worldbank.org/INTAFRICA/Resources/257994-1335471959878/Kenya_County_Fact_Sheets_Dec2011.pdf). Accessed 7 May 2014.

164 Luoma M, Doherty J, Muchiri S, et al. August 2010. *Kenya Health System Assessment* 2010. Bethesda, MD: Health Systems 20/20 project, Abt Associates Inc.

175 World Health Organization. Guidelines for essential trauma care. Geneva, World Health Organization, 2004.

1  
2  
3 | [186](#) Razzak JA, Hyder AA, Akhtar T, et al. Assessing emergency medical care in low-income  
4 countries: A pilot study from Pakistan. *BMC Emergency Medicine* 2008; **8**:8.  
5  
6

7  
8 | [197](#) Mock CN, Tiska M, Adu-Ampofo M, et al. Improvements in prehospital trauma care in an  
9 African country with no formal emergency medical services. *J Trauma* 2002; **53**(1): 90–7.  
10  
11

12  
13 | [2018](#) Samai O, Senegeh P. Facilitating emergency obstetrical care through transportation and  
14 communication, Bo, Sierra Leone. *International Journal of Gynecology and Obstetrics* 1997; 59  
15  
16  
17  
18  
19  
20  
21  
22  
23  
24  
25  
26  
27  
28  
29  
30  
31  
32  
33  
34  
35  
36  
37  
38  
39  
40  
41  
42  
43  
44  
45  
46  
47  
48  
49  
50  
51  
52  
53  
54  
55  
56  
57  
58  
59  
60

Suppl **2**:S157–64.

[21](#) Calvello E, Reynolds T, Hirshon JM, Buckle C, Moresky R, O'Neill J, Wallis LA. Emergency  
care in sub-Saharan Africa: Results of a consensus conference. *African Journal of Emergency  
Medicine* 2013; **3**(1): 42–8.

1  
2  
3  
4  
5  
6  
7  
8  
9  
10  
11  
12  
13  
14  
15  
16  
17  
18  
19  
20  
21  
22  
23  
24  
25  
26  
27  
28  
29  
30  
31  
32  
33  
34  
35  
36  
37  
38  
39  
40  
41  
42  
43  
44  
45  
46  
47  
48  
49  
50  
51  
52  
53  
54  
55  
56  
57  
58  
59  
60

## Manuscript: Emergency and urgent care capacity: an assessment of health facilities in western Kenya

Thomas F. Burke, et al.

STROBE Statement—checklist of items that should be included in reports of observational studies

|                              | Item No | Recommendation                                                                                                                                                                                                                                                                                                                                                                                                                                                         | DONE | PAGE  |
|------------------------------|---------|------------------------------------------------------------------------------------------------------------------------------------------------------------------------------------------------------------------------------------------------------------------------------------------------------------------------------------------------------------------------------------------------------------------------------------------------------------------------|------|-------|
| <b>Title and abstract</b>    | 1       | (a) Indicate the study's design with a commonly used term in the title or the abstract                                                                                                                                                                                                                                                                                                                                                                                 | X    | 1, 5  |
|                              |         | (b) Provide in the abstract an informative and balanced summary of what was done and what was found                                                                                                                                                                                                                                                                                                                                                                    | X    | 5     |
| <b>Introduction</b>          |         |                                                                                                                                                                                                                                                                                                                                                                                                                                                                        |      |       |
| Background/rationale         | 2       | Explain the scientific background and rationale for the investigation being reported                                                                                                                                                                                                                                                                                                                                                                                   | X    | 6-8   |
| Objectives                   | 3       | State specific objectives, including any prespecified hypotheses                                                                                                                                                                                                                                                                                                                                                                                                       | X    | 8     |
| <b>Methods</b>               |         |                                                                                                                                                                                                                                                                                                                                                                                                                                                                        |      |       |
| Study design                 | 4       | Present key elements of study design early in the paper                                                                                                                                                                                                                                                                                                                                                                                                                | X    | 8     |
| Setting                      | 5       | Describe the setting, locations, and relevant dates, including periods of recruitment, exposure, follow-up, and data collection                                                                                                                                                                                                                                                                                                                                        | X    | 8-10  |
| Participants                 | 6       | (a) <i>Cohort study</i> —Give the eligibility criteria, and the sources and methods of selection of participants. Describe methods of follow-up<br><i>Case-control study</i> —Give the eligibility criteria, and the sources and methods of case ascertainment and control selection. Give the rationale for the choice of cases and controls<br><i>Cross-sectional study</i> —Give the eligibility criteria, and the sources and methods of selection of participants | X    | 9-10  |
|                              |         | (b) <i>Cohort study</i> —For matched studies, give matching criteria and number of exposed and unexposed<br><i>Case-control study</i> —For matched studies, give matching criteria and the number of controls per case                                                                                                                                                                                                                                                 | N/A  | N/A   |
| Variables                    | 7       | Clearly define all outcomes, exposures, predictors, potential confounders, and effect modifiers. Give diagnostic criteria, if applicable                                                                                                                                                                                                                                                                                                                               | X    | 9     |
| Data sources/<br>measurement | 8*      | For each variable of interest, give sources of data and details of methods of assessment (measurement). Describe comparability of assessment methods if there is more than one group                                                                                                                                                                                                                                                                                   | X    | 9     |
| Bias                         | 9       | Describe any efforts to address potential sources of bias                                                                                                                                                                                                                                                                                                                                                                                                              | X    | 17-18 |
| Study size                   | 10      | Explain how the study size was arrived at                                                                                                                                                                                                                                                                                                                                                                                                                              | N/A  | N/A   |
| Quantitative variables       | 11      | Explain how quantitative variables were handled in the analyses. If applicable, describe which groupings were chosen and why                                                                                                                                                                                                                                                                                                                                           | N/A  | N/A   |
| Statistical methods          | 12      | (a) Describe all statistical methods, including those used to control for confounding                                                                                                                                                                                                                                                                                                                                                                                  | X    | 9-10  |
|                              |         | (b) Describe any methods used to examine subgroups and                                                                                                                                                                                                                                                                                                                                                                                                                 | N/A  | N/A   |

interactions

(c) Explain how missing data were addressed

(d) *Cohort study*—If applicable, explain how loss to follow-up was addressed*Case-control study*—If applicable, explain how matching of cases and controls was addressed*Cross-sectional study*—If applicable, describe analytical methods taking account of sampling strategy

(e) Describe any sensitivity analyses

|     |     |
|-----|-----|
|     |     |
| N/A | N/A |

| <b>Results</b>           |     |                                                                                                                                                                                                              | <b>DONE</b> | <b>PAGE</b> |
|--------------------------|-----|--------------------------------------------------------------------------------------------------------------------------------------------------------------------------------------------------------------|-------------|-------------|
| Participants             | 13* | (a) Report numbers of individuals at each stage of study—eg numbers potentially eligible, examined for eligibility, confirmed eligible, included in the study, completing follow-up, and analysed            | X           | 10          |
|                          |     | (b) Give reasons for non-participation at each stage                                                                                                                                                         | N/A         | N/A         |
|                          |     | (c) Consider use of a flow diagram                                                                                                                                                                           | N/A         | N/A         |
| Descriptive data         | 14* | (a) Give characteristics of study participants (eg demographic, clinical, social) and information on exposures and potential confounders                                                                     | X           | 10, 22      |
|                          |     | (b) Indicate number of participants with missing data for each variable of interest                                                                                                                          | N/A         | N/A         |
|                          |     | (c) Cohort study—Summarise follow-up time (eg, average and total amount)                                                                                                                                     | N/A         | N/A         |
| Outcome data             | 15* | Cohort study—Report numbers of outcome events or summary measures over time                                                                                                                                  | N/A         | N/A         |
|                          |     | Case-control study—Report numbers in each exposure category, or summary measures of exposure                                                                                                                 | N/A         | N/A         |
|                          |     | Cross-sectional study—Report numbers of outcome events or summary measures                                                                                                                                   | X           | 23-25       |
| Main results             | 16  | (a) Give unadjusted estimates and, if applicable, confounder-adjusted estimates and their precision (eg, 95% confidence interval). Make clear which confounders were adjusted for and why they were included | N/A         | N/A         |
|                          |     | (b) Report category boundaries when continuous variables were categorized                                                                                                                                    | N/A         | N/A         |
|                          |     | (c) If relevant, consider translating estimates of relative risk into absolute risk for a meaningful time period                                                                                             | N/A         | N/A         |
| Other analyses           | 17  | Report other analyses done—eg analyses of subgroups and interactions, and sensitivity analyses                                                                                                               | X           | 9           |
| <b>Discussion</b>        |     |                                                                                                                                                                                                              |             |             |
| Key results              | 18  | Summarise key results with reference to study objectives                                                                                                                                                     | X           | 14-15       |
| Limitations              | 19  | Discuss limitations of the study, taking into account sources of potential bias or imprecision. Discuss both direction and magnitude of any potential bias                                                   | X           | 17          |
| Interpretation           | 20  | Give a cautious overall interpretation of results considering objectives, limitations, multiplicity of analyses, results from similar studies, and other relevant evidence                                   | X           | 15-17       |
| Generalisability         | 21  | Discuss the generalisability (external validity) of the study results                                                                                                                                        | X           | 17          |
| <b>Other information</b> |     |                                                                                                                                                                                                              |             |             |



1  
2 Funding 22 Give the source of funding and the role of the funders for the present study  
3 and, if applicable, for the original study on which the present article is  
4 based  
5

|   |   |
|---|---|
| X | 3 |
|---|---|

6  
7 \*Give information separately for cases and controls in case-control studies and, if applicable, for exposed and  
8 unexposed groups in cohort and cross-sectional studies.  
9

10 **Note:** An Explanation and Elaboration article discusses each checklist item and gives methodological background and  
11 published examples of transparent reporting. The STROBE checklist is best used in conjunction with this article (freely  
12 available on the Web sites of PLoS Medicine at <http://www.plosmedicine.org/>, Annals of Internal Medicine at  
13 <http://www.annals.org/>, and Epidemiology at <http://www.epidem.com/>). Information on the STROBE Initiative is  
14 available at [www.strobe-statement.org](http://www.strobe-statement.org).  
15  
16

For peer review only

# BMJ Open

## Emergency and urgent care capacity in a resource-limited setting: an assessment of health facilities in western Kenya

|                                 |                                                                                                                                                                                                                                                                                                                                                                                                                                                                                                                                                                                                                                                                                                                                                                                                                       |
|---------------------------------|-----------------------------------------------------------------------------------------------------------------------------------------------------------------------------------------------------------------------------------------------------------------------------------------------------------------------------------------------------------------------------------------------------------------------------------------------------------------------------------------------------------------------------------------------------------------------------------------------------------------------------------------------------------------------------------------------------------------------------------------------------------------------------------------------------------------------|
| Journal:                        | <i>BMJ Open</i>                                                                                                                                                                                                                                                                                                                                                                                                                                                                                                                                                                                                                                                                                                                                                                                                       |
| Manuscript ID:                  | bmjopen-2014-006132.R2                                                                                                                                                                                                                                                                                                                                                                                                                                                                                                                                                                                                                                                                                                                                                                                                |
| Article Type:                   | Research                                                                                                                                                                                                                                                                                                                                                                                                                                                                                                                                                                                                                                                                                                                                                                                                              |
| Date Submitted by the Author:   | 08-Sep-2014                                                                                                                                                                                                                                                                                                                                                                                                                                                                                                                                                                                                                                                                                                                                                                                                           |
| Complete List of Authors:       | Burke, Thomas; Massachusetts General Hospital, Department of Emergency Medicine<br>Hines, Rosemary; Massachusetts General Hospital, Department of Emergency Medicine<br>Ahn, Roy; Massachusetts General Hospital, Department of Emergency Medicine<br>Walters, Michelle; Massachusetts General Hospital, Department of Emergency Medicine<br>Young, David; Massachusetts General Hospital, Department of Emergency Medicine<br>Anderson, Rachel; Massachusetts General Hospital, Department of Emergency Medicine<br>Tom, Sabrina; Massachusetts General Hospital, Department of Emergency Medicine<br>Clark, Rachel; Massachusetts General Hospital, Department of Emergency Medicine<br>Obita, Walter; Sagam Community Hospital,<br>Nelson, Brett; Massachusetts General Hospital, Department of Emergency Medicine |
| <b>Primary Subject Heading</b>: | Emergency medicine                                                                                                                                                                                                                                                                                                                                                                                                                                                                                                                                                                                                                                                                                                                                                                                                    |
| Secondary Subject Heading:      | Global health                                                                                                                                                                                                                                                                                                                                                                                                                                                                                                                                                                                                                                                                                                                                                                                                         |
| Keywords:                       | ACCIDENT & EMERGENCY MEDICINE, International health services < HEALTH SERVICES ADMINISTRATION & MANAGEMENT, TRAUMA MANAGEMENT                                                                                                                                                                                                                                                                                                                                                                                                                                                                                                                                                                                                                                                                                         |
|                                 |                                                                                                                                                                                                                                                                                                                                                                                                                                                                                                                                                                                                                                                                                                                                                                                                                       |

SCHOLARONE™  
Manuscripts

1  
2  
3  
4  
5  
6  
7  
8  
9  
10  
11  
12  
13  
14  
15  
16  
17  
18  
19  
20  
21  
22  
23  
24  
25  
26  
27  
28  
29  
30  
31  
32  
33  
34  
35  
36  
37  
38  
39  
40  
41  
42  
43  
44  
45  
46  
47  
48  
49  
50  
51  
52  
53  
54  
55  
56  
57  
58  
59  
60

## Manuscript: Emergency and urgent care capacity: an assessment of health facilities in western Kenya

Thomas F. Burke, et al.

STROBE Statement—checklist of items that should be included in reports of observational studies

|                              | Item No | Recommendation                                                                                                                                                                                                                                                                                                                                                                                                                                                         | DONE | PAGE  |
|------------------------------|---------|------------------------------------------------------------------------------------------------------------------------------------------------------------------------------------------------------------------------------------------------------------------------------------------------------------------------------------------------------------------------------------------------------------------------------------------------------------------------|------|-------|
| <b>Title and abstract</b>    | 1       | (a) Indicate the study's design with a commonly used term in the title or the abstract                                                                                                                                                                                                                                                                                                                                                                                 | X    | 1, 5  |
|                              |         | (b) Provide in the abstract an informative and balanced summary of what was done and what was found                                                                                                                                                                                                                                                                                                                                                                    | X    | 5     |
| <b>Introduction</b>          |         |                                                                                                                                                                                                                                                                                                                                                                                                                                                                        |      |       |
| Background/rationale         | 2       | Explain the scientific background and rationale for the investigation being reported                                                                                                                                                                                                                                                                                                                                                                                   | X    | 6-8   |
| Objectives                   | 3       | State specific objectives, including any prespecified hypotheses                                                                                                                                                                                                                                                                                                                                                                                                       | X    | 8     |
| <b>Methods</b>               |         |                                                                                                                                                                                                                                                                                                                                                                                                                                                                        |      |       |
| Study design                 | 4       | Present key elements of study design early in the paper                                                                                                                                                                                                                                                                                                                                                                                                                | X    | 8     |
| Setting                      | 5       | Describe the setting, locations, and relevant dates, including periods of recruitment, exposure, follow-up, and data collection                                                                                                                                                                                                                                                                                                                                        | X    | 8-10  |
| Participants                 | 6       | (a) <i>Cohort study</i> —Give the eligibility criteria, and the sources and methods of selection of participants. Describe methods of follow-up<br><i>Case-control study</i> —Give the eligibility criteria, and the sources and methods of case ascertainment and control selection. Give the rationale for the choice of cases and controls<br><i>Cross-sectional study</i> —Give the eligibility criteria, and the sources and methods of selection of participants | X    | 9-10  |
|                              |         | (b) <i>Cohort study</i> —For matched studies, give matching criteria and number of exposed and unexposed<br><i>Case-control study</i> —For matched studies, give matching criteria and the number of controls per case                                                                                                                                                                                                                                                 |      |       |
| Variables                    | 7       | Clearly define all outcomes, exposures, predictors, potential confounders, and effect modifiers. Give diagnostic criteria, if applicable                                                                                                                                                                                                                                                                                                                               | X    | 9     |
| Data sources/<br>measurement | 8*      | For each variable of interest, give sources of data and details of methods of assessment (measurement). Describe comparability of assessment methods if there is more than one group                                                                                                                                                                                                                                                                                   | X    | 9     |
| Bias                         | 9       | Describe any efforts to address potential sources of bias                                                                                                                                                                                                                                                                                                                                                                                                              | X    | 17-18 |
| Study size                   | 10      | Explain how the study size was arrived at                                                                                                                                                                                                                                                                                                                                                                                                                              | N/A  | N/A   |
| Quantitative variables       | 11      | Explain how quantitative variables were handled in the analyses. If applicable, describe which groupings were chosen and why                                                                                                                                                                                                                                                                                                                                           | N/A  | N/A   |
| Statistical methods          | 12      | (a) Describe all statistical methods, including those used to control for confounding                                                                                                                                                                                                                                                                                                                                                                                  | X    | 9-10  |
|                              |         | (b) Describe any methods used to examine subgroups and                                                                                                                                                                                                                                                                                                                                                                                                                 |      |       |

|  |  |                                                                                                                                                                                                                                                                                                           |     |     |
|--|--|-----------------------------------------------------------------------------------------------------------------------------------------------------------------------------------------------------------------------------------------------------------------------------------------------------------|-----|-----|
|  |  | interactions                                                                                                                                                                                                                                                                                              |     |     |
|  |  | (c) Explain how missing data were addressed                                                                                                                                                                                                                                                               | N/A | N/A |
|  |  | (d) <i>Cohort study</i> —If applicable, explain how loss to follow-up was addressed<br><i>Case-control study</i> —If applicable, explain how matching of cases and controls was addressed<br><i>Cross-sectional study</i> —If applicable, describe analytical methods taking account of sampling strategy | N/A | N/A |
|  |  | (e) Describe any sensitivity analyses                                                                                                                                                                                                                                                                     | N/A | N/A |

| <b>Results</b>           |     |                                                                                                                                                                                                              | <b>DONE</b> | <b>PAGE</b> |
|--------------------------|-----|--------------------------------------------------------------------------------------------------------------------------------------------------------------------------------------------------------------|-------------|-------------|
| Participants             | 13* | (a) Report numbers of individuals at each stage of study—eg numbers potentially eligible, examined for eligibility, confirmed eligible, included in the study, completing follow-up, and analysed            | X           | 10          |
|                          |     | (b) Give reasons for non-participation at each stage                                                                                                                                                         | N/A         | N/A         |
|                          |     | (c) Consider use of a flow diagram                                                                                                                                                                           | N/A         | N/A         |
| Descriptive data         | 14* | (a) Give characteristics of study participants (eg demographic, clinical, social) and information on exposures and potential confounders                                                                     | X           | 10, 22      |
|                          |     | (b) Indicate number of participants with missing data for each variable of interest                                                                                                                          | N/A         | N/A         |
|                          |     | (c) Cohort study—Summarise follow-up time (eg, average and total amount)                                                                                                                                     | N/A         | N/A         |
| Outcome data             | 15* | Cohort study—Report numbers of outcome events or summary measures over time                                                                                                                                  | N/A         | N/A         |
|                          |     | Case-control study—Report numbers in each exposure category, or summary measures of exposure                                                                                                                 | N/A         | N/A         |
|                          |     | Cross-sectional study—Report numbers of outcome events or summary measures                                                                                                                                   | X           | 23-25       |
| Main results             | 16  | (a) Give unadjusted estimates and, if applicable, confounder-adjusted estimates and their precision (eg, 95% confidence interval). Make clear which confounders were adjusted for and why they were included | N/A         | N/A         |
|                          |     | (b) Report category boundaries when continuous variables were categorized                                                                                                                                    | N/A         | N/A         |
|                          |     | (c) If relevant, consider translating estimates of relative risk into absolute risk for a meaningful time period                                                                                             | N/A         | N/A         |
| Other analyses           | 17  | Report other analyses done—eg analyses of subgroups and interactions, and sensitivity analyses                                                                                                               | X           | 9           |
| <b>Discussion</b>        |     |                                                                                                                                                                                                              |             |             |
| Key results              | 18  | Summarise key results with reference to study objectives                                                                                                                                                     | X           | 14-15       |
| Limitations              | 19  | Discuss limitations of the study, taking into account sources of potential bias or imprecision. Discuss both direction and magnitude of any potential bias                                                   | X           | 17          |
| Interpretation           | 20  | Give a cautious overall interpretation of results considering objectives, limitations, multiplicity of analyses, results from similar studies, and other relevant evidence                                   | X           | 15-17       |
| Generalisability         | 21  | Discuss the generalisability (external validity) of the study results                                                                                                                                        | X           | 17          |
| <b>Other information</b> |     |                                                                                                                                                                                                              |             |             |

1  
2 Funding 22 Give the source of funding and the role of the funders for the present study  
3 and, if applicable, for the original study on which the present article is  
4 based  
5

|   |   |
|---|---|
| X | 3 |
|---|---|

6  
7 \*Give information separately for cases and controls in case-control studies and, if applicable, for exposed and  
8 unexposed groups in cohort and cross-sectional studies.  
9

10 **Note:** An Explanation and Elaboration article discusses each checklist item and gives methodological background and  
11 published examples of transparent reporting. The STROBE checklist is best used in conjunction with this article (freely  
12 available on the Web sites of PLoS Medicine at <http://www.plosmedicine.org/>, Annals of Internal Medicine at  
13 <http://www.annals.org/>, and Epidemiology at <http://www.epidem.com/>). Information on the STROBE Initiative is  
14 available at [www.strobe-statement.org](http://www.strobe-statement.org).  
15  
16  
17  
18  
19  
20  
21  
22  
23  
24  
25  
26  
27  
28  
29  
30  
31  
32  
33  
34  
35  
36  
37  
38  
39  
40  
41  
42  
43  
44  
45  
46  
47  
48  
49  
50  
51  
52  
53  
54  
55  
56  
57  
58  
59  
60

1  
2  
3 **Emergency and urgent care capacity in a resource-limited setting: an assessment of health**  
4 **facilities in western Kenya**  
5  
6  
7  
8  
9

10  
11 **Authors and affiliations**  
12

13 Thomas F. Burke, MD <sup>a, b, c</sup>  
14

15 Rosemary Hines <sup>a</sup>  
16

17 Roy Ahn, MPH, ScD <sup>a, b, c</sup>  
18

19 Michelle Walters <sup>a</sup>  
20

21 David Young, MD <sup>a</sup>  
22

23 Rachel Eleanor Anderson, MD <sup>a</sup>  
24

25 Sabrina Tom, MD <sup>a</sup>  
26

27 Rachel Clark <sup>a</sup>  
28

29 Walter Obita, MD <sup>c</sup>  
30

31 Brett D. Nelson, MD, MPH <sup>a, b, c</sup>  
32  
33  
34  
35

36  
37  
38  
39  
40  
41 a. Division of Global Health and Human Rights, Department of Emergency Medicine,  
42  
43 Massachusetts General Hospital, Zero Emerson Place, Suite 104, Boston, MA 02114, USA  
44

45  
46 b. Harvard Medical School, 25 Shattuck St, Boston, MA 02115, USA  
47

48  
49 c. Sagam Community Hospital, Siaya Road, Luanda 50307, Kenya  
50

51  
52  
53 **Corresponding author:**  
54

55  
56 Thomas F. Burke, MD, FACEP, FRSM  
57  
58  
59  
60

1  
2  
3 Division of Global Health and Human Rights, Massachusetts General Hospital

4  
5  
6 Zero Emerson Place, Suite 104, Boston, MA 02114, USA

7  
8 E-mail [tfburke@partners.org](mailto:tfburke@partners.org)

9  
10  
11 Phone +1-617-584-0064

12  
13  
14  
15  
16  
17  
18 **Word count:**

19  
20  
21 2,963 words

22  
23  
24  
25  
26 **Keywords:**

27  
28 Emergency medicine

29  
30 Urgent care

31  
32 Capacity assessment

33  
34  
35 Kenya

36  
37  
38 Pre-hospital care

39  
40  
41  
42  
43  
44  
45  
46  
47  
48  
49  
50  
51  
52  
53  
54  
55  
56  
57  
58  
59  
60

For peer review only

## Abstract

**Objective:** Injuries, trauma, and non-communicable diseases are responsible for a rising proportion of death and disability in low- and middle-income countries. Delivering effective emergency and urgent health care for these and other conditions in resource-limited settings is challenging. In this study, we sought to examine and characterize emergency and urgent care capacity in a resource-limited setting.

**Methods:** We conducted an assessment in western Kenya within all 30 primary and secondary hospitals and within a stratified random sampling of 30 dispensaries and health centers. Key informants were the most senior facility health care provider and manager available. Emergency physician researchers utilized a semi-structured assessment tool, and data were analyzed using descriptive statistics and thematic coding.

**Results:** No lower-level facilities and 30% of higher-level facilities reported having a defined, organized approach to trauma. Forty-three percent of higher-level facilities had access to an anesthetist. The majority of lower-level facilities had suture and wound care supplies and gloves but typically lacked other basic trauma supplies. For cardiac care, 50% of higher-level facilities had morphine, but a minority had functioning ECG, sublingual nitroglycerin, or defibrillator. Only 20% of lower-level facilities had glucometers, and only 33% of higher-level facilities could care for diabetic emergencies. No facilities had sepsis clinical guidelines.

**Conclusions:** Large gaps in essential emergency care capabilities were identified at all facility levels in western Kenya. There is great opportunity for a universally deployed basic emergency care package, advanced emergency care package and facility designation scheme, and reliable pre-hospital care transportation and communications system for resource-limited settings.



**Strengths and limitations of this study:**

- This assessment was completed within all 30 primary and secondary hospitals and a stratified random sampling of 30 dispensaries and health centers in western Kenya
- Semi-structured interviews were conducted among facility leadership to examine and characterize emergency and urgent care capacity in this resource-limited setting
- Large gaps at all facility levels were identified in essential care capabilities
- There is great opportunity for a universally deployed basic emergency care package, advanced emergency care package and facility designation scheme, and reliable pre-hospital care transportation and communications system for resource-limited settings.
- The study may not be generalizable outside of this region.

## Introduction

### *Background and importance*

Providing effective emergency and urgent care is a considerable challenge in low- and middle-income countries. Difficulties exist with regard to transportation, communications, equipment, facility infrastructure, medication supply lines, affordability, and availability of skilled health care providers. Historically, infections caused by communicable diseases have been the major contributors to morbidity and mortality in resource-limited settings. However, traumatic injuries and non-communicable diseases (NCDs), such as heart disease and cancer, are rising rapidly and have recently become recognized as significant contributors to the burden of disease in developing countries. Eighty percent of all NCD deaths in 2008 (29 million) occurred in low- and middle-income countries, with cardiovascular disease, cancers, and respiratory disease the leading causes.<sup>1</sup> Furthermore, 16,000 people die globally each day from injuries alone, accounting for over 15% of the global burden of disease. Approximately 90% of these injuries occur in low- and middle-income countries.<sup>2-4</sup>

Kenya is facing an epidemic of NCDs and an increasing burden of injury and trauma. Between 2003 and 2008, the proportion of deaths related to trauma in western Kenya increased from 2.5% to 5.9%, with road traffic accidents (RTA) the leading cause.<sup>5</sup> In the past, most Kenya public health programs focused on communicable diseases. As a consequence, Kenya has developed disease-specific clinical guidelines for HIV/AIDS, malaria, tuberculosis, and other communicable diseases, but there are currently no national guidelines for emergency care.<sup>6,7</sup> As rates of NCDs and trauma-related injuries and deaths increase, there is a growing urgency to

1  
2  
3 provide adequate and organized treatment for time-sensitive illnesses and injuries, such as  
4  
5 acute myocardial infarction, stroke, trauma, and sepsis.  
6  
7  
8  
9

10  
11 Recent assessments performed in a select group of facilities in Nigeria, South Africa, and  
12  
13 Tanzania documented emergency and critical care services in terms of resources, routines, and  
14  
15 guidelines, while a small-scale evaluation of public emergency departments in Kenya described  
16  
17 the most common diagnoses of presenting patients.<sup>8-11</sup> Other facility-level studies in Kenya  
18  
19 have assessed inpatient care.<sup>12,13</sup> However, no assessment of the emergency care capabilities  
20  
21 across a region in Kenya has ever been published.  
22  
23  
24  
25  
26  
27

### 28 *Goals of this investigation*

29  
30  
31 The Division of Global Health and Human Rights in the Department of Emergency Medicine at  
32  
33 the Massachusetts General Hospital was approached by the Kenyan Ministry of Health and  
34  
35 asked to assess the emergency and urgent health care capabilities across all levels of facilities in  
36  
37 Kisumu and Siaya counties of western Kenya. This paper reports major findings from this  
38  
39 assessment.  
40  
41  
42  
43  
44  
45

### 46 *Health care provision in Kenya*

47  
48 Kenya has 6,626 health facilities across 47 counties, serving a population of over 43 million  
49  
50 people. Kisumu and Siaya counties have populations of 968,909 (52% urban) and 842,304 (11%  
51  
52 urban), respectively.<sup>14,15</sup> There are a total of 150 health facilities in Kisumu (92 public, 15 non-  
53  
54 governmental, 15 faith-based, and 28 private) and a total of 162 health facilities in Siaya (115  
55  
56  
57  
58  
59  
60

1  
2  
3 public, 7 non-governmental, 17 faith-based, and 23 private). The Kenya Essential Package for  
4  
5 Health (KEPH) defines the levels of care in Kenya: Level 1 for community-administered care and  
6  
7 Levels 2-6 for health care facilities (Table 1).<sup>16</sup> Levels 2, 3, 4, 5, and 6 represent dispensaries and  
8  
9 clinics, health centers, primary hospitals, secondary hospitals, and tertiary hospitals,  
10  
11 respectively.  
12  
13  
14

## 15 16 17 18 **Methods**

### 19 20 *Study design and setting*

21  
22 This facility-based emergency care capabilities assessment was conducted between November  
23  
24 1, 2013 and January 20, 2014, in Kisumu and Siaya counties in western Kenya. All 30 Level 4 and  
25  
26 5 facilities in the two counties (there are no Level 6 facilities in these counties) were selected  
27  
28 for assessment. Selection of 30 additional facilities occurred via randomized stratified sampling  
29  
30 of each additional type of facility – dispensary, health center, and health clinic. The criterion for  
31  
32 inclusion was an open healthcare facility currently providing health services; there were no  
33  
34 restrictions based on geography or accessibility.  
35  
36  
37  
38  
39  
40  
41  
42

### 43 44 *Methods and measurements*

45  
46 This facility-based emergency care capabilities assessment utilized semi-structured, key-  
47  
48 informant interviews using a data collection instrument designed by the study authors. The key  
49  
50 informants were the most senior institution staff members identified during the day of the  
51  
52 assessment – typically the chief medical officer and/or senior administrator. The assessment  
53  
54 tool drew from existing models of facility assessment in South Africa, Pakistan, and Tanzania, as  
55  
56  
57  
58  
59  
60

1  
2  
3 well as the WHO Guidelines for Essential Trauma Care.<sup>9,10,17,18</sup> The assessment tool was refined  
4  
5  
6 by expert consultation with the team's emergency physicians and public health epidemiologists,  
7  
8  
9 and covered eight domains: facility demographics, referral services, personnel, economics,  
10  
11 supplies and laboratory, trauma, critical care, and anesthesia. The interviews consisted of open-  
12  
13 response questions related to health care services, most common conditions of patients  
14  
15 presenting for care, provider capabilities, equipment, supplies, and medications. Qualitative  
16  
17 questions pertained to attitudes and perceptions related to provider morale, cooperation and  
18  
19 communication between referring and receiving health facilities, and recommendations for  
20  
21 continuing education and referral services.  
22  
23  
24  
25  
26  
27

28 The key-informant interviews were conducted by our field research team – consisting at all  
29  
30 times of at least one emergency physician and one research assistant. Three different  
31  
32 emergency physicians were involved throughout the data collection process. The delivery of  
33  
34 questions and interview structure were discussed *a priori* by all three physician interviewers in  
35  
36 order to standardize the interview process. Participants were provided an overview of the  
37  
38 project, and the voluntary and confidential nature of the assessment was described. All  
39  
40 participants gave verbal consent prior to participation.  
41  
42  
43  
44  
45  
46  
47

#### 48 *Analysis*

49  
50 Data were analyzed using standard descriptive and frequency analyses, utilizing Microsoft Excel  
51  
52 2007 (Seattle, WA, USA). Qualitative research methods involved thematic analysis of interviews  
53  
54 in order to best understand emergent findings.  
55  
56  
57  
58  
59  
60

### *Ethical review and funding*

This study was reviewed and approved by the Institutional Review Board of Partners Healthcare (Boston, MA, USA) and the Ministry of Health of Kenya. This research received no specific grant from any funding agency in the public, commercial, or not-for-profit sectors.

## **Results**

A key informant at each of the 60 facilities was surveyed between November 1, 2013 and January 20, 2014. The facility sites were a mix of dispensaries/health clinics, health centers, primary hospitals, and secondary hospitals, as shown in Table 2. (There are no tertiary hospitals in Kisumu or Siaya County.) The 60 key informants comprised 10 chief medical officers (all at the hospital level), 39 nurse managers (facility matron), and 11 lead clinical officers.

### ***Level 2 and 3 Facilities***

#### *Common Conditions*

Key informants were asked by open response to list the 10 most common emergent and urgent conditions presenting to their health facility. The most frequently reported conditions at Level 2 and 3 facilities were (in order of reporting frequency) malaria (30 of 30 facilities, 100%), diarrhea (26/30, 87%), upper respiratory infections (24/30, 80%), skin infections (18/30, 60%), sexually transmitted infections (15/30, 50%), pneumonia (14/30, 47%), and RTAs/trauma (9/30, 30%).

### *Trauma and Injury*

When asked if their Level 2 and 3 facilities have a specific approach to a trauma patient that differs from how they approach a medical patient, 0% of key informants answered in the affirmative. In response to how well respondents felt their facility can handle major trauma, all 30 said they refer. Twenty-six (87%) of the 30 said they refer immediately, and four (13%) said they try to provide first aid then refer. The majority of providers (21/30, 70%) said their facility is poorly equipped to handle a broken bone.

The majority of Level 2 and 3 facilities had suture and wound care supplies (26/30, 87%) and gloves (27/30, 90%) (Table 3). Few of these facilities had oxygen (7/30, 23%) and splinting/casting supplies (3/30, 10%), and none had blood for transfusion (0/30, 0%).

### *Critical Care*

When asked about the standard procedure for treating someone with a possible heart attack, all 30 providers at Level 2 and 3 facilities reported that their facility refers. Eighteen (60%) of the 30 reported referring patients immediately, eight (27%) said they treat symptoms (e.g., painkillers, oxygen) and then refer, and four (13%) said they check vitals and then refer. Of the 30 Level 2 and 3 facilities, one had sublingual nitroglycerin.

The majority of providers (29/30, 93%) at the lower-level facilities said that their facility is ill-prepared to handle possible diabetic ketoacidosis (DKA) and must refer all cases. Overall, six (20%) Level 2 and 3 facilities had a glucometer and five (17%) had insulin.

1  
2  
3  
4  
5  
6 In regards to a standard procedure for cases of possible sepsis, fifteen (50%) of the 30 providers  
7  
8 at Level 2 and 3 facilities said they refer, 11 (37%) reported providing treatment without  
9  
10 referral (e.g., antibiotics, IV fluids), and four (13%) providers said that they did not know how to  
11  
12 approach sepsis. A majority of the Level 2 and 3 facilities (24/30, 80%) had antibiotics.  
13  
14  
15

### 16 17 18 **Facility Levels 4 and 5**

#### 19 20 *Common Conditions*

21  
22 The most frequently reported presenting emergent and urgent conditions at Level 4 and 5  
23  
24 facilities were similar to those at Level 2 and 3 facilities. They are (in order of reporting  
25  
26 frequency) malaria (30/30, 100%), diarrhea (22/30, 73%), sexually transmitted infections  
27  
28 (21/30, 70%), pneumonia (21/30, 70%), RTAs/trauma (18/30, 60%), and upper respiratory  
29  
30 infections (16/30, 53%).  
31  
32  
33  
34  
35  
36  
37

#### 38 *Trauma and Injury*

39  
40 Nine (30%) providers at Level 4 and 5 facilities reported that their facility has an organized  
41  
42 approach to trauma (e.g., emergency team with assembly point). When asked if they are  
43  
44 notified in advance of patients arriving to the hospital, four (13%) answered in the affirmative.  
45  
46  
47

48  
49 In review of basic trauma supplies in Level 4 and 5 facilities, 97% had gloves, 93% had suture  
50  
51 and wound care materials, and 83% had oxygen. All five of the Level 5 facilities had chest tubes  
52  
53 and x-ray capability, and four of the five had splinting and casting supplies. Three (12%) of the  
54  
55 25 Level 4 facilities had chest tubes and 12 (48%) had x-ray capability. Sixteen (64%) of the 25  
56  
57  
58  
59  
60



1  
2  
3 Level 4 facilities, and all five of the Level 5 facilities had blood available for transfusion.  
4  
5  
6 Seventeen (57%) providers at Level 4 and 5 facilities reported that their facility did not have  
7  
8 access to a trained provider that can administer general or regional anesthesia.  
9

### 10 11 12 13 *Critical Care*

14  
15  
16 When asked about diagnosis and treatment of someone presenting with a possible acute  
17  
18 myocardial infarction (AMI), 20 (80%) of 25 providers at level 4 hospitals reported that their  
19  
20 facility refers; 11 (44%) reported that their facility stabilizes (e.g., oxygen or first aid) and then  
21  
22 refers, and nine (30%) providers reported that their facility refers immediately. Five (20%)  
23  
24 providers at Level 4 facilities reported that their facility provides diagnostic and treatment  
25  
26 services without referral (e.g., ACE inhibitors, beta blockers, or aspirin). All 5 Level 5 facilities  
27  
28 reported giving oxygen to suspected AMI patients, while three reported providing aspirin, two  
29  
30 reported providing morphine and one reported providing epinephrine. Several of the Level 4  
31  
32 and 5 facilities were lacking in supplies and equipment to manage cardiac emergencies. Fifteen  
33  
34 (50%) facilities had morphine, six (20%) had a functioning ECG machine, six (20%) had  
35  
36 nitroglycerin, and four (13%) had a defibrillator.  
37  
38  
39  
40  
41  
42  
43  
44  
45

46 Ten (33%) of 30 providers at Level 4 and 5 facilities reported that their facility is well-prepared  
47  
48 to manage DKA. A majority of Level 4 and 5 facilities had a glucometer (28/30, 93%) and insulin  
49  
50 (24/30, 80%).  
51  
52  
53  
54  
55  
56  
57  
58  
59  
60

1  
2  
3 When asked about a standard procedure for cases of sepsis, the vast majority (29/30, 97%) of  
4  
5 Level 4 and 5 facilities reported providing some treatment for sepsis (e.g., antibiotics, IV fluids),  
6  
7  
8 but none had standardized clinical care guidelines. Twenty-three (92%) of the 25 Level 4 and all  
9  
10  
11 five of the Level 5 facilities had vasopressor agents. Twenty-two (88%) of the 25 Level 4 and all  
12  
13  
14 five of the Level 5 facilities had antibiotics.

## 15 16 17 18 **Discussion**

19  
20  
21 With an increasing number of NCDs, RTAs, and other time-sensitive illnesses and injuries, the  
22  
23  
24 provision of emergency care in low-and middle-income countries is taking on increasing  
25  
26  
27 importance. Our study illustrates that essential emergency and urgent care is severely lacking in  
28  
29  
30 western Kenya. Limited communication, infrastructure, supplies, and properly trained human  
31  
32  
33 resources all negatively impact the ability to deliver quality emergency and urgent health care.

34  
35  
36 Although by definition Level 2 and Level 3 facilities in Kenya are not designed nor expected to  
37  
38  
39 provide comprehensive care for acutely ill patients, we elected to study their capabilities  
40  
41  
42 around emergency care since community members often present to them with acute life-  
43  
44  
45 threatening illnesses and injuries. We discovered that virtually all of the 30 Level 2 and 3  
46  
47  
48 facilities we studied were unable to respond to the essential needs of patients presenting with  
49  
50  
51 acute trauma, a possible heart attack, diabetic emergencies, or sepsis. Most facilities reported  
52  
53  
54 transferring patients without even basic assessments or interventions. Few facilities had any  
55  
56  
57 organized approach in transferring a patient or notifying the receiving facility.  
58  
59  
60

1  
2  
3 The authors view the Level 2 and 3 facility findings as a compelling call to action for the  
4 development of a contextually appropriate, standardized basic level training and materials  
5 package for emergency care. For example, a training program in the essentials of emergency  
6 care for Level 2 and 3 facilities should include the development of a standard approach to all  
7 acute care patients: basic assessment and intervention of airway, breathing, and circulation;  
8 taking and interpreting vital signs; methodical total body assessment; hemorrhage control;  
9 immobilization and splinting of potential injuries; capabilities of providing basic high-impact  
10 diagnostics and interventions (e.g., point-of-care glucose, ECG, aspirin, antibiotics, splints); and  
11 a pre-established reliable and rapid referral and notification plan.  
12  
13  
14  
15  
16  
17  
18  
19  
20  
21  
22  
23  
24  
25  
26  
27

28 While emergent and urgent conditions present frequently to Level 4 and 5 facilities, we  
29 discovered that the hospitals' capabilities varied considerably. While all of the 30 facilities had  
30 gaps across each of the domains we studied, many of the gaps at the Level 4 facilities were  
31 quite profound. Overall, some of the more salient findings in the Level 4 and 5 facilities'  
32 assessments were: 70% do not have a standardized approach to trauma, few have the basic  
33 materials necessary to manage trauma (e.g. chest tube, blood), less than half have a functioning  
34 x-ray machine, less than half (43%) of the operating theatres have access to an anesthetist, only  
35 six of 30 have EKG machines or nitroglycerin, most do not give aspirin for heart attacks, few are  
36 able to provide care for DKA, and no facility had a standardized approach to sepsis.  
37  
38  
39  
40  
41  
42  
43  
44  
45  
46  
47  
48  
49  
50  
51  
52

53 The findings from our Level 4 and Level 5 facility assessment demonstrate an urgent need for a  
54 system-wide intervention, targeting the unmet higher-level facility needs of the acutely ill and  
55  
56  
57  
58  
59  
60

1  
2  
3 injured. Many of the Level 4 and 5 facilities did not meet the most basic standard for the  
4  
5 essentials of emergency care delivery that we believe can – and should – be universally  
6  
7 implemented at all lower-level facilities. We propose that in addition to every facility being  
8  
9 brought up to the basic level, a second package in essentials of advanced emergency care  
10  
11 should be developed and deployed to select Level 4 and 5 facilities. These selected facilities,  
12  
13 once meeting standards for training, materials, and infrastructure, should then be designated  
14  
15 and widely recognized and supported as *centers of excellence for advanced emergency care*,  
16  
17 and thereby capable of providing quality assessment and initial stabilization of all emergent and  
18  
19 urgent conditions.  
20  
21  
22  
23  
24  
25  
26  
27

28 Access to quality pre-hospital care services was universally poor in our study sample and can be  
29  
30 seen as an opportunity for organization and improvement. A basic pre-hospital system should  
31  
32 be created by establishing a mechanism to access reliable transportation staffed with personnel  
33  
34 who have basic life-support skills. Elsewhere, it has been shown that training lay people in the  
35  
36 community, such as community health workers or public transportation drivers to function as  
37  
38 pre-hospital care providers, can greatly improve the quality of emergency care.<sup>19</sup> Additionally, a  
39  
40 standardized communication method ought to be instituted. For example, in Sierra Leone, it  
41  
42 has been shown that equipping remote health facilities and traditional birth attendants with  
43  
44 radio receivers linked to referral hospitals can shorten response times and reduce maternal  
45  
46 deaths.<sup>20</sup>  
47  
48  
49  
50  
51  
52  
53  
54  
55  
56  
57  
58  
59  
60

1  
2  
3 Although not addressed in this study, it is likely that these findings would be similar elsewhere  
4  
5 across sub-Saharan Africa. If this assessment is indeed generalizable, the authors believe that  
6  
7 the development of a set of standardized packages for basic and advanced essentials of  
8  
9 emergency care in low-resource settings, as well as designating *centers of excellence for*  
10  
11 *advanced emergency care*, should be a priority for the WHO and other stakeholders. The  
12  
13 African Federation for Emergency Medicine has been developing consensus recommendations  
14  
15 for emergency care packages for various facility levels.<sup>21</sup>  
16  
17  
18  
19  
20  
21  
22

23  
24 Our study had several limitations. Although we believe the lessons learned are representative  
25  
26 of counties in Kenya and other low-resource settings globally, our findings are not definitively  
27  
28 generalizable beyond the two counties surveyed. Furthermore, we recognize that elements of  
29  
30 our survey may have been limited by social desirability bias. Although we tried to mitigate this  
31  
32 with the confidential and voluntary nature of our survey and by explaining the purpose of our  
33  
34 study, participants may not have felt comfortable reporting problems or inadequacies in their  
35  
36 facilities. While our research staff included a local Kenyan who was present at all site visits and  
37  
38 functioned as a language and cultural ambassador, language and cultural differences may have  
39  
40 contributed to confounding variables. Furthermore, while informants were selected based on  
41  
42 their senior leadership roles and expertise with the operations of their facility, their responses  
43  
44 might not have always accurately reflected opinions of the majority of providers at the facility.  
45  
46  
47  
48  
49  
50  
51  
52

53  
54 In conclusion, with an increasing epidemic of NCDs and an increasing burden of injury and  
55  
56 trauma in low-resource areas, access to quality essential emergency and urgent care services is  
57  
58  
59  
60

1  
2  
3 critical for the health of surrounding communities. Our 60-facility assessment in western Kenya  
4  
5 identified significant widespread gaps in current emergency care capabilities, particularly in  
6  
7  
8 identifying and appropriately caring for victims of trauma, acute myocardial infarction, diabetic  
9  
10 emergencies, and sepsis. There is great opportunity for development of a universally deployed  
11  
12 basic package in the essentials of emergency care, a selectively implemented package in the  
13  
14 essentials of advanced emergency care, a center of excellence for emergency care facility  
15  
16 designation scheme, and a reliable pre-hospital care transportation and communications  
17  
18 system. Additionally, the profound gap in readily available trained anesthetists requires  
19  
20  
21 immediate attention.  
22  
23  
24  
25  
26  
27  
28  
29  
30  
31  
32  
33  
34  
35  
36  
37  
38  
39  
40  
41  
42  
43  
44  
45  
46  
47  
48  
49  
50  
51  
52  
53  
54  
55  
56  
57  
58  
59  
60

**Table 1: Description of levels of care in Kenya**

|         |                          |                                                                                                                                                                                                                                                                                                                                                                                                                                                                    |
|---------|--------------------------|--------------------------------------------------------------------------------------------------------------------------------------------------------------------------------------------------------------------------------------------------------------------------------------------------------------------------------------------------------------------------------------------------------------------------------------------------------------------|
| Level 1 | Community                | <ul style="list-style-type: none"> <li>- Care outside facility in households, communities, and villages</li> <li>- Maximum population served: 5,000</li> </ul>                                                                                                                                                                                                                                                                                                     |
| Level 2 | Dispensaries/<br>Clinics | <ul style="list-style-type: none"> <li>- Has limited staff (nurses, public health technicians, and assistants)</li> <li>- Responsible for community engagement through curative, promotive, preventive, and rehabilitative care at a basic level</li> <li>- Up to four beds for observation</li> <li>- Maximum population served: 10,000(rural) - 15,000(urban)</li> </ul>                                                                                         |
| Level 3 | Health<br>Centers        | <ul style="list-style-type: none"> <li>- Staffed by nurses, clinical officers, and occasionally doctors</li> <li>- Wider range of curative and preventive services than Level 2</li> <li>- Provide minor surgical services, like incision and drainage</li> <li>- Basic emergency preparedness</li> <li>- 12-49 beds</li> <li>- Maximum population served: 30,000-40,000</li> </ul>                                                                                |
| Level 4 | Primary<br>Hospitals     | <ul style="list-style-type: none"> <li>- Provide referral level outpatient care, curative and preventive care, surgical treatment techniques, and comprehensive emergency services</li> <li>- Provide clinical services in obstetrics and gynecology, child health, medicine, and surgery and anesthesia</li> <li>- Inpatient care and 24-hour service</li> <li>- Minimum 50 beds</li> <li>- Maximum population served: 100,000(rural) - 200,000(urban)</li> </ul> |

|           |                                     |                                                                                                                                                                                                                                                                                                                                                                                                                                                 |
|-----------|-------------------------------------|-------------------------------------------------------------------------------------------------------------------------------------------------------------------------------------------------------------------------------------------------------------------------------------------------------------------------------------------------------------------------------------------------------------------------------------------------|
| Level 5-6 | Secondary/<br>Tertiary<br>Hospitals | <ul style="list-style-type: none"><li>- Higher concentration of resources and personnel (medical professionals, nurses, and midwives)</li><li>- Provide clinical services in medicine, general surgery and anesthesia, pediatrics, and obstetrics/gynecology, dental, psychiatry, comprehensive accident and emergency, ENT, ophthalmology, dermatology, ICU</li><li>- Minimum 50 beds</li><li>- Maximum population served: 1,000,000</li></ul> |
|-----------|-------------------------------------|-------------------------------------------------------------------------------------------------------------------------------------------------------------------------------------------------------------------------------------------------------------------------------------------------------------------------------------------------------------------------------------------------------------------------------------------------|



**Table 2: Health facilities studied in Kisumu and Siaya counties in Kenya; November 2013-  
January 2014**

| Type of Health Facility            | Kisumu    | Siaya     | Total     |
|------------------------------------|-----------|-----------|-----------|
| Dispensary/Health Clinic (Level 2) | 9         | 12        | <b>21</b> |
| Health Center (Level 3)            | 6         | 3         | <b>9</b>  |
| Primary Hospitals (Level 4)        | 18        | 6         | <b>25</b> |
| Secondary Hospitals (Level 5)      | 4         | 1         | <b>5</b>  |
| <b>Total</b>                       | <b>38</b> | <b>22</b> | <b>60</b> |

**Table 3: Functioning supplies and equipment at health facilities in Kisumu and Siaya, Kenya**  
(number of facilities)

|                                | <b>Level 2</b><br>n=21 (%) | <b>Level 3</b><br>n=9 (%) | <b>Level 4</b><br>n=25 (%) | <b>Level 5</b><br>n=5 (%) | <b>Total</b><br>n=60 (%) |
|--------------------------------|----------------------------|---------------------------|----------------------------|---------------------------|--------------------------|
| <b>General</b>                 |                            |                           |                            |                           |                          |
| Gloves                         | 20 (95)                    | 7 (78)                    | 24 (96)                    | 5 (100)                   | 56 (93)                  |
| Face masks                     | 10 (48)                    | 4 (44)                    | 21 (84)                    | 5 (100)                   | 40 (67)                  |
| Gowns                          | 3 (14)                     | 4 (44)                    | 17 (68)                    | 5 (100)                   | 29 (48)                  |
| Monitored beds                 | NA                         | NA                        | 1 (4)                      | 4 (80)                    | 6 (10)                   |
| Central line kits              | NA                         | NA                        | 1 (4)                      | 4 (80)                    | 5 (8)                    |
| Suction                        | 5 (24)                     | 4 (44)                    | 19 (76)                    | 4 (80)                    | 32 (53)                  |
| Blood pressure cuffs           | 18 (86)                    | 6 (67)                    | 23 (92)                    | 5 (100)                   | 52 (87)                  |
| Splint/cast supplies           | 2 (10)                     | 1 (11)                    | 14 (56)                    | 4 (80)                    | 21 (35)                  |
| Suture and wound-care supplies | 18 (86)                    | 8 (89)                    | 23 (92)                    | 5 (100)                   | 54 (90)                  |
| Defibrillator                  | 1 (5)                      | 0 (0)                     | 1 (4)                      | 3 (60)                    | 5 (8)                    |
| Back-up power                  | 1 (5)                      | 2 (22)                    | 14 (56)                    | 5 (100)                   | 22 (42)                  |
| Chest tube trays               | 1 (5)                      | 1 (11)                    | 3 (12)                     | 5 (100)                   | 10 (17)                  |

|                                     |         |        |         |         |         |
|-------------------------------------|---------|--------|---------|---------|---------|
| <b>Laboratory/Diagnos-<br/>tics</b> |         |        |         |         |         |
| Ultrasound                          | 1 (5)   | 0 (0)  | 9 (36)  | 5 (100) | 15 (25) |
| ECG                                 | 0 (0)   | 1 (11) | 3 (12)  | 3 (60)  | 8 (13)  |
| X-ray                               | 1 (5)   | 0 (0)  | 12 (48) | 5 (100) | 18 (30) |
| Otoscope                            | 5 (24)  | 4 (44) | 14 (56) | 5 (100) | 28 (47) |
| Ophthalmoscope                      | 4 (19)  | 4 (44) | 13 (52) | 5 (100) | 26 (43) |
| Glucometer                          | 3 (14)  | 3 (33) | 23 (92) | 5 (100) | 34 (57) |
| <b>Medications</b>                  |         |        |         |         |         |
| Nitroglycerin                       | 0 (0)   | 1 (11) | 4 (16)  | 2 (40)  | 7 (12)  |
| Antibiotics                         | 16 (76) | 8 (89) | 22 (88) | 5 (100) | 51 (85) |
| Opiates                             | 0 (0)   | 0 (0)  | 10 (40) | 5 (100) | 15 (25) |
| Insulin                             | 4 (19)  | 1 (11) | 19 (76) | 5 (100) | 29 (48) |
| Pressors                            | NA      | NA     | 23 (92) | 5 (100) | 48 (80) |
| General and<br>regional anesthesia  | NA      | NA     | 8 (32)  | 5 (100) | 13 (22) |
| <b>Airway/Breathing</b>             |         |        |         |         |         |
| Oxygen                              | 5 (24)  | 2 (22) | 20 (80) | 5 (100) | 32 (53) |

|                      |        |        |         |         |         |
|----------------------|--------|--------|---------|---------|---------|
| CPAP/BPAP<br>machine | NA     | NA     | 0 (0)   | 1 (20)  | 1 (2)   |
| Ambubag              | 8 (38) | 1 (11) | 20 (80) | 5 (100) | 34 (57) |
| Intubation supplies  | 2 (10) | 4 (44) | 12 (48) | 5 (100) | 23 (38) |

For peer review only

**Funding:**

This research received no specific grant from any funding agency in the public, commercial, or not-for-profit sectors. This study was funded internally and by in-kind donation by the authors' Division of Global Health and Human Rights at Massachusetts General Hospital.

**Competing interests:**

All of the authors have been formally queried, and no authors have competing interests with this study.

**Data sharing statement:** Extra data are available by emailing [tfburke@partners.org](mailto:tfburke@partners.org).

**Author contributions:**

TFB was involved in study design, implementation, analysis, and writing of the manuscript. RA was involved in study analysis and writing of the manuscript. RA was involved in study design, implementation, analysis, and writing of the manuscript. MW, DY, REA, ST, RC, and WO were involved in study design and data collection. BDN was involved in study design, implementation, analysis, and writing of the manuscript. All authors have reviewed, edited, and approved the final submission. TFB takes responsibility for the paper as a whole.

**References**

- 1 World Health Organization. Global status report on noncommunicable diseases 2010. Geneva: World Health Organization, 2010.

1  
2  
3 2 Peden M, McGee K, Sharma G. The injury chartbook: A graphical overview of the global  
4 burden of injuries. Geneva: World Health Organization, 2002.  
5  
6

7  
8 3 Gosselin R, Spiegel D, Coughlin R, et al. Injuries: the neglected burden in developing  
9 countries. *Bulletin of the World Health Organization* 2009; **87**:246.  
10  
11

12  
13 4 Mock C, Lormand JD, Goosen J, et al. Guidelines for essential trauma care. Geneva:  
14 World Health Organization, 2004.  
15  
16

17  
18 5 Odhiambo FO, Beynon CM, Ogwang S, et al. Trauma-related mortality among adults in  
19 rural western Kenya: Characterising deaths using data from a health and demographic  
20 surveillance system. *PLoS ONE* 2013; **8**(11):e79840.  
21  
22  
23

24  
25 6 Ministry of Health, Government of Kenya. Guidelines for antiretroviral drug therapy in  
26 Kenya. 2011. Available at: [http://www.who.int/hiv/pub/guidelines/kenya\\_art.pdf](http://www.who.int/hiv/pub/guidelines/kenya_art.pdf). Accessed 7  
27 May 2014.  
28  
29  
30

31  
32 7 Ministry of Public Health and Sanitation. Guidelines on management of leprosy and  
33 tuberculosis. 2009. Available at: [http://www.who.int/hiv/pub/guidelines/kenya\\_tb.pdf](http://www.who.int/hiv/pub/guidelines/kenya_tb.pdf).  
34 Accessed 7 May 2014.  
35  
36  
37  
38

39  
40 8 Baker T, Lugazia E, Eriksen J, et al. Emergency and critical care services in Tanzania: A  
41 survey of ten hospitals. *BMC Health Services Research* 2013; **13**:140.  
42  
43  
44

45  
46 9 Wallis LA, Garach SR, Kropman A. State of emergency medicine in South Africa. *Int J*  
47 *Emerg Med* 2008; **1**(2):69–71.  
48  
49

50  
51 10 Wen LS, Oshiomogho JI, Eluwa GI, et al. Characteristics and capabilities of emergency  
52 departments in Abuja, Nigeria. *Emerg Med J* 2012; **29**(10):798–801.  
53  
54  
55  
56  
57  
58  
59  
60

- 1  
2  
3 11 Wachira BW, Wallis LA, Geduld H. An analysis of the clinical practice of emergency  
4 medicine in public emergency departments in Kenya. *Emerg Med J* 2012; **29**(6):473–6.  
5  
6  
7  
8 12 Mwaniki P, Ayieko P, Todd J, et al. Assessment of paediatric inpatient  
9 care during a multifaceted quality improvement intervention in Kenyan district  
10 hospitals: Use of prospectively collected case record data. *BMC Health Serv Res*  
11 2014; **14**:312.  
12  
13  
14  
15  
16  
17  
18 13 Irimu GW, Gathara D, Zurovac D, et al. Performance of health workers in the  
19 management of seriously sick children at a Kenyan tertiary hospital: Before and after a training  
20 intervention. *PLoS One* 2012; **7**(7):e39964.  
21  
22  
23  
24  
25  
26 14 Commission on Revenue Allocation (2011) Kenya County Fact Sheets. Available at:  
27 [http://siteresources.worldbank.org/INTAFRICA/Resources/257994-1335471959878/  
28 Kenya\\_County\\_Fact\\_Sheets\\_Dec2011.pdf](http://siteresources.worldbank.org/INTAFRICA/Resources/257994-1335471959878/Kenya_County_Fact_Sheets_Dec2011.pdf). Accessed 7 May 2014.  
29  
30  
31  
32  
33 15 Commission on Revenue Allocation (2011) Kenya County Fact Sheets. Available at:  
34 [http://siteresources.worldbank.org/INTAFRICA/Resources/257994-1335471959878/  
35 Kenya\\_County\\_Fact\\_Sheets\\_Dec2011.pdf](http://siteresources.worldbank.org/INTAFRICA/Resources/257994-1335471959878/Kenya_County_Fact_Sheets_Dec2011.pdf). Accessed 7 May 2014.  
36  
37  
38  
39  
40  
41 16 Luoma M, Doherty J, Muchiri S, et al. August 2010. *Kenya Health System Assessment*  
42 2010. Bethesda, MD: Health Systems 20/20 project, Abt Associates Inc.  
43  
44  
45  
46 17 World Health Organization. Guidelines for essential trauma care. Geneva, World Health  
47 Organization, 2004.  
48  
49  
50  
51 18 Razzak JA, Hyder AA, Akhtar T, et al. Assessing emergency medical care in low-income  
52 countries: A pilot study from Pakistan. *BMC Emergency Medicine* 2008; **8**:8.  
53  
54  
55  
56  
57  
58  
59  
60

1  
2  
3 19 Mock CN, Tiska M, Adu-Ampofo M, et al. Improvements in prehospital trauma care in an  
4 African country with no formal emergency medical services. *J Trauma* 2002; **53**(1): 90–7.  
5  
6

7  
8 20 Samai O, Senegeh P. Facilitating emergency obstetrical care through transportation and  
9 communication, Bo, Sierra Leone. *International Journal of Gynecology and Obstetrics* 1997; 59  
10  
11  
12  
13  
14  
15  
16  
17  
18  
19  
20  
21  
22  
23  
24  
25  
26  
27  
28  
29  
30  
31  
32  
33  
34  
35  
36  
37  
38  
39  
40  
41  
42  
43  
44  
45  
46  
47  
48  
49  
50  
51  
52  
53  
54  
55  
56  
57  
58  
59  
60

21 Calvello E, Reynolds T, Hirshon JM, Buckle C, Moresky R, O'Neill J, Wallis LA. Emergency  
22 care in sub-Saharan Africa: Results of a consensus conference. *African Journal of Emergency*  
23  
24  
25  
26  
27  
28  
29  
30  
31  
32  
33  
34  
35  
36  
37  
38  
39  
40  
41  
42  
43  
44  
45  
46  
47  
48  
49  
50  
51  
52  
53  
54  
55  
56  
57  
58  
59  
60

21  
22  
23  
24  
25  
26  
27  
28  
29  
30  
31  
32  
33  
34  
35  
36  
37  
38  
39  
40  
41  
42  
43  
44  
45  
46  
47  
48  
49  
50  
51  
52  
53  
54  
55  
56  
57  
58  
59  
60



1  
2  
3 **Emergency and urgent care capacity in a resource-limited setting: an assessment of health**  
4  
5 **facilities in western Kenya**  
6  
7  
8  
9

10  
11 **Authors and affiliations**  
12

13 Thomas F. Burke, MD <sup>a, b, c</sup>  
14

15 Rosemary Hines <sup>a</sup>  
16

17 Roy Ahn, MPH, ScD <sup>a, b, c</sup>  
18

19 Michelle Walters <sup>a</sup>  
20

21 David Young, MD <sup>a</sup>  
22

23 Rachel Eleanor Anderson, MD <sup>a</sup>  
24

25 Sabrina Tom, MD <sup>a</sup>  
26

27 Rachel Clark <sup>a</sup>  
28

29 Walter Obita, MD <sup>c</sup>  
30

31 Brett D. Nelson, MD, MPH <sup>a, b, c</sup>  
32  
33  
34  
35

36  
37  
38  
39  
40  
41 a. Division of Global Health and Human Rights, Department of Emergency Medicine,  
42  
43 Massachusetts General Hospital, Zero Emerson Place, Suite 104, Boston, MA 02114, USA  
44

45  
46 b. Harvard Medical School, 25 Shattuck St, Boston, MA 02115, USA  
47

48  
49 c. Sagam Community Hospital, Siaya Road, Luanda 50307, Kenya  
50

51  
52  
53 **Corresponding author:**  
54

55  
56 Thomas F. Burke, MD, FACEP, FRSM  
57  
58  
59  
60

1  
2  
3 Division of Global Health and Human Rights, Massachusetts General Hospital

4  
5  
6 Zero Emerson Place, Suite 104, Boston, MA 02114, USA

7  
8 E-mail [tfburke@partners.org](mailto:tfburke@partners.org)

9  
10  
11 Phone +1-617-584-0064

12  
13  
14  
15  
16 **Funding:**

17  
18 This research received no specific grant from any funding agency in the public, commercial, or  
19 not-for-profit sectors. This study was funded internally and by in-kind donation by the authors'  
20  
21  
22  
23  
24 Division of Global Health and Human Rights at Massachusetts General Hospital.

25  
26  
27  
28 **Competing interests:**

29  
30 All of the authors have been formally queried, and no authors have competing interests with  
31  
32  
33  
34 this study.

35  
36  
37  
38 **Data sharing statement:** Extra data are available by emailing [tfburke@partners.org](mailto:tfburke@partners.org).

39  
40  
41  
42  
43 **Author contributions:**

44  
45  
46 TFB was involved in study design, implementation, analysis, and writing of the manuscript. RA  
47  
48 was involved in study analysis and writing of the manuscript. RA was involved in study design,  
49  
50  
51 implementation, analysis, and writing of the manuscript. MW, DY, REA, ST, RC, and WO were  
52  
53  
54 involved in study design and data collection. BDN was involved in study design,

1  
2  
3  
4  
5  
6  
7  
8  
9  
10  
11  
12  
13  
14  
15  
16  
17  
18  
19  
20  
21  
22  
23  
24  
25  
26  
27  
28  
29  
30  
31  
32  
33  
34  
35  
36  
37  
38  
39  
40  
41  
42  
43  
44  
45  
46  
47  
48  
49  
50  
51  
52  
53  
54  
55  
56  
57  
58  
59  
60

implementation, analysis, and writing of the manuscript. All authors have reviewed, edited, and approved the final submission. TFB takes responsibility for the paper as a whole.

**Word count:**

2,9~~6353~~ words

**Keywords:**

Emergency medicine

Urgent care

Capacity assessment

Kenya

Pre-hospital care

For peer review only

## Abstract

**Objective:** Injuries, trauma, and non-communicable diseases are responsible for a rising proportion of death and disability in low- and middle-income countries. Delivering effective emergency and urgent health care for these and other conditions in resource-limited settings is challenging. In this study, we sought to examine and characterize emergency and urgent care capacity in a resource-limited setting.

**Methods:** We conducted an assessment in western Kenya within all 30 primary and secondary hospitals and within a stratified random sampling of 30 dispensaries and health centers. Key informants were the most senior facility health care provider and manager available. Emergency physician researchers utilized a semi-structured assessment tool, and data were analyzed using descriptive statistics and thematic coding.

**Results:** No lower-level facilities and 30% of higher-level facilities reported having a defined, organized approach to trauma. Forty-three percent of higher-level facilities had access to an anesthetist. The majority of lower-level facilities had suture and wound care supplies and gloves but typically lacked other basic trauma supplies. For cardiac care, 50% of higher-level facilities had morphine, but a minority had functioning ECG, sublingual nitroglycerin, or defibrillator. Only 20% of lower-level facilities had glucometers, and only 33% of higher-level facilities could care for diabetic emergencies. No facilities had sepsis clinical guidelines.

**Conclusions:** Large gaps in essential emergency care capabilities were identified at all facility levels in western Kenya. There is great opportunity for a universally deployed basic emergency care package, advanced emergency care package and facility designation scheme, and reliable pre-hospital care transportation and communications system for resource-limited settings.

**Strengths and limitations of this study:**

- This assessment was completed within all 30 primary and secondary hospitals and a stratified random sampling of 30 dispensaries and health centers in western Kenya
- Semi-structured interviews were conducted among facility leadership to examine and characterize emergency and urgent care capacity in this resource-limited setting
- Large gaps at all facility levels were identified in essential care capabilities
- There is great opportunity for a universally deployed basic emergency care package, advanced emergency care package and facility designation scheme, and reliable pre-hospital care transportation and communications system for resource-limited settings.
- The study may not be generalizable outside of this region.

## Introduction

### *Background and importance*

Providing effective emergency and urgent care is a considerable challenge in low- and middle-income countries. Difficulties exist with regard to transportation, communications, equipment, facility infrastructure, medication supply lines, affordability, and availability of skilled health care providers. Historically, infections caused by communicable diseases have been the major contributors to morbidity and mortality in resource-limited settings. However, traumatic injuries and non-communicable diseases (NCDs), such as heart disease and cancer, are rising rapidly and have recently become recognized as significant contributors to the burden of disease in developing countries. Eighty percent of all NCD deaths in 2008 (29 million) occurred in low- and middle-income countries, with cardiovascular disease, cancers, and respiratory disease the leading causes.<sup>1</sup> Furthermore, 16,000 people die globally each day from injuries alone, accounting for over 15% of the global burden of disease. Approximately 90% of these injuries occur in low- and middle-income countries.<sup>2-4</sup>

Kenya is facing an epidemic of NCDs and an increasing burden of injury and trauma. Between 2003 and 2008, the proportion of deaths related to trauma in western Kenya increased from 2.5% to 5.9%, with road traffic accidents (RTA) the leading cause.<sup>5</sup> In the past, most Kenya public health programs focused on communicable diseases. As a consequence, Kenya has developed disease-specific clinical guidelines for HIV/AIDS, malaria, tuberculosis, and other communicable diseases, but there are currently no national guidelines for emergency care.<sup>6,7</sup> As rates of NCDs and trauma-related injuries and deaths increase, there is a growing urgency to

1  
2  
3 provide adequate and organized treatment for time-sensitive illnesses and injuries, such as  
4  
5 acute myocardial infarction, stroke, trauma, and sepsis.  
6  
7  
8  
9

10  
11 Recent assessments performed in a select group of facilities in Nigeria, South Africa, and  
12  
13 Tanzania documented emergency and critical care services in terms of resources, routines, and  
14  
15 guidelines, while a small-scale evaluation of public emergency departments in Kenya described  
16  
17 the most common diagnoses of presenting patients.<sup>8-11</sup> Other facility-level studies in Kenya  
18  
19 have assessed inpatient care.<sup>12,13</sup> However, no assessment of the emergency care capabilities  
20  
21 across a region in Kenya has ever been published.  
22  
23  
24  
25  
26  
27

### 28 *Goals of this investigation*

29  
30  
31 The Division of Global Health and Human Rights in the Department of Emergency Medicine at  
32  
33 the Massachusetts General Hospital was approached by the Kenyan Ministry of Health and  
34  
35 asked to assess the emergency and urgent health care capabilities across all levels of facilities in  
36  
37 Kisumu and Siaya counties of western Kenya. This paper reports major findings from this  
38  
39 assessment.  
40  
41  
42  
43  
44  
45

### 46 *Health care provision in Kenya*

47  
48 Kenya has 6,626 health facilities across 47 counties, serving a population of over 43 million  
49  
50 people. Kisumu and Siaya counties have populations of 968,909 (52% urban) and 842,304 (11%  
51  
52 urban), respectively.<sup>14,15</sup> There are a total of 150 health facilities in Kisumu (92 public, 15 non-  
53  
54 governmental, 15 faith-based, and 28 private) and a total of 162 health facilities in Siaya (115  
55  
56  
57  
58  
59  
60

1  
2  
3 public, 7 non-governmental, 17 faith-based, and 23 private). The Kenya Essential Package for  
4  
5 Health (KEPH) defines the levels of care in Kenya: Level 1 for community-administered care and  
6  
7 Levels 2-6 for health care facilities (Table 1).<sup>16</sup> Levels 2, 3, 4, 5, and 6 represent dispensaries and  
8  
9 clinics, health centers, primary hospitals, secondary hospitals, and tertiary hospitals,  
10  
11 respectively.  
12  
13  
14

## 15 16 17 18 **Methods**

### 19 20 *Study design and setting*

21  
22 This facility-based emergency care capabilities assessment was conducted between November  
23  
24 1, 2013 and January 20, 2014, in Kisumu and Siaya counties in western Kenya. All 30 Level 4 and  
25  
26 5 facilities in the two counties (there are no Level 6 facilities in these counties) were selected  
27  
28 for assessment. Selection of 30 additional facilities occurred via randomized stratified sampling  
29  
30 of each additional type of facility – dispensary, health center, and health clinic. The criterion for  
31  
32 inclusion was an open healthcare facility currently providing health services; there were no  
33  
34 restrictions based on geography or accessibility.  
35  
36  
37  
38  
39  
40  
41  
42

### 43 44 *Methods and measurements*

45  
46 This facility-based emergency care capabilities assessment utilized semi-structured, key-  
47  
48 informant interviews using a data collection instrument designed by the study authors. The key  
49  
50 informants were the most senior institution staff members identified during the day of the  
51  
52 assessment – typically the chief medical officer and/or senior administrator. The assessment  
53  
54 tool drew from existing models of facility assessment in South Africa, Pakistan, and Tanzania, as  
55  
56  
57  
58  
59  
60



1  
2  
3 well as the WHO Guidelines for Essential Trauma Care.<sup>9,10,17,18</sup> The assessment tool was refined  
4  
5  
6 by expert consultation with the team's emergency physicians and public health epidemiologists,  
7  
8  
9 and covered eight domains: facility demographics, referral services, personnel, economics,  
10  
11 supplies and laboratory, trauma, critical care, and anesthesia. The interviews consisted of open-  
12  
13 response questions related to health care services, most common conditions of patients  
14  
15 presenting for care, provider capabilities, equipment, supplies, and medications. Qualitative  
16  
17 questions pertained to attitudes and perceptions related to provider morale, cooperation and  
18  
19 communication between referring and receiving health facilities, and recommendations for  
20  
21 continuing education and referral services.  
22  
23  
24  
25  
26  
27

28 The key-informant interviews were conducted by our field research team – consisting at all  
29  
30 times of at least one emergency physician and one research assistant. Three different  
31  
32 emergency physicians were involved throughout the data collection process. The delivery of  
33  
34 questions and interview structure were discussed *a priori* by all three physician interviewers in  
35  
36 order to standardize the interview process. Participants were provided an overview of the  
37  
38 project, and the voluntary and confidential nature of the assessment was described. All  
39  
40 participants gave verbal consent prior to participation.  
41  
42  
43  
44  
45  
46  
47

### 48 *Analysis*

49  
50 Data were analyzed using standard descriptive and frequency analyses, utilizing Microsoft Excel  
51  
52 2007 (Seattle, WA, USA). Qualitative research methods involved thematic analysis of interviews  
53  
54 in order to best understand emergent findings.  
55  
56  
57  
58  
59  
60

### *Ethical review and funding*

This study was reviewed and approved by the Institutional Review Board of Partners Healthcare (Boston, MA, USA) and the Ministry of Health of Kenya. This research received no specific grant from any funding agency in the public, commercial, or not-for-profit sectors.

## **Results**

A key informant at each of the 60 facilities was surveyed between November 1, 2013 and January 20, 2014. The facility sites were a mix of dispensaries/health clinics, health centers, primary hospitals, and secondary hospitals, as shown in Table 2. (There are no tertiary hospitals in Kisumu or Siaya County.) The 60 key informants comprised 10 chief medical officers (all at the hospital level), 39 nurse managers (facility matron), and 11 lead clinical officers.

### ***Level 2 and 3 Facilities***

#### *Common Conditions*

Key informants were asked by open response to list the 10 most common emergent and urgent conditions presenting to their health facility. The most frequently reported conditions at Level 2 and 3 facilities were (in ~~rank~~ of reporting frequency) malaria (30 ~~of~~ 30 facilities, 100%), diarrhea (26/30, 87%), upper respiratory infections (24/30, 80%), skin infections (18/30, 60%), sexually transmitted infections (15/30, 50%), pneumonia (14/30, 47%), and RTAs/trauma (9/30, 30%).

### *Trauma and Injury*

When asked if their Level 2 and 3 facilities have a specific approach to a trauma patient that differs from how they approach a medical patient, 0% of key informants answered in the affirmative. In response to how well respondents felt their facility can handle major trauma, all 30 said they refer. Twenty-six (87%) of the 30 said they refer immediately, and four (13%) said they try to provide first aid then refer. The majority of providers (21/30, 70%) said their facility is poorly equipped to handle a broken bone.

The majority of Level 2 and 3 facilities had sutures and wound care supplies (26/30, 87%) and gloves (27/30, 90%) (Table 3). Few of these facilities had oxygen (7/30, 23%) and splinting/casting supplies (3/30, 10%), and none had blood for transfusion (0/30, 0%).

### *Critical Care*

When asked about the standard procedure for treating someone with a possible heart attack, all 30 providers at Level 2 and 3 facilities reported that their facility refers. Eighteen (60%) of the 30 reported referring patients immediately, eight (27%) said they treat symptoms (e.g., painkillers, oxygen) and then refer, and four (13%) said they check vitals and then refer. Of the 30 Level 2 and 3 facilities, one had sublingual nitroglycerin.

The majority of providers (29/30, 93%) at the lower-level facilities said that their facility is ill-prepared to handle possible diabetic ketoacidosis (DKA) and must refer all cases. Overall, six (20%) Level 2 and 3 facilities had a glucometer and five (17%) had insulin.

1  
2  
3  
4  
5  
6 In regards to a standard procedure for cases of possible sepsis, fifteen (50%) of the 30 providers  
7  
8 at Level 2 and 3 facilities said they refer, 11 (37%) reported providing treatment without  
9  
10 referral (e.g., antibiotics, IV fluids), and four (13%) providers said that they did not know how to  
11  
12 approach sepsis. A majority of the Level 2 and 3 facilities (24/30, 80%) had~~ve~~ antibiotics.  
13  
14  
15  
16  
17

### 18 **Facility Levels 4 and 5**

#### 19 *Common Conditions*

20  
21  
22 The most frequently reported presenting emergent and urgent conditions at Level 4 and 5  
23  
24 facilities were similar to those at Level 2 and 3 facilities. They are (in ~~rank-order~~ of reporting  
25  
26 frequency): malaria (30/30, 100%), diarrhea (22/30, 73%), sexually transmitted infections  
27  
28 (21/30, 70%), pneumonia (21/30, 70%), RTAs/trauma (18/30, 60%), and upper respiratory  
29  
30 infections (16/30, 53%).  
31  
32  
33  
34  
35  
36  
37

#### 38 *Trauma and Injury*

39  
40  
41 Nine (30%) providers at Level 4 and 5 facilities reported that their facility has an organized  
42  
43 approach to trauma (e.g., emergency team with assembly point). When asked if they are  
44  
45 notified in advance of patients arriving to the hospital, four (13%) answered in the affirmative.  
46  
47

48  
49 In review of basic trauma supplies in Level 4 and 5 facilities, 97% had~~ve~~ gloves, 93% had~~ve~~  
50  
51 suture and wound care materials, and 83% had~~ve~~ oxygen. All five of the Level 5 facilities had~~ve~~  
52  
53 chest tubes and x-ray capability, and four of the five had~~ve~~ splinting and casting supplies. Three  
54  
55 (12%) of the 25 Level 4 facilities had~~ve~~ chest tubes and 12 (48%) had~~ve~~ x-ray capability. Sixteen  
56  
57  
58  
59  
60

1  
2  
3 (64%) of the 25 Level 4 facilities, and all five of the Level 5 facilities had~~ve~~ blood available for  
4  
5  
6 transfusion. Seventeen (57%) providers at Level 4 and 5 facilities reported that their facility  
7  
8  
9 ~~does~~-did not have access to a trained provider that can administer general or regional  
10  
11 anesthesia.

### 12 13 14 15 16 *Critical Care*

17  
18 When asked about diagnosis and treatment of someone presenting with a possible acute  
19  
20 myocardial infarction (AMI), 20 (80%) of 25 providers at level 4 hospitals reported that their  
21  
22 facility refers; 11 (44%) reported that their facility stabilizes (e.g., oxygen or first aid) and then  
23  
24 refers, and nine (30%) providers reported that their facility refers immediately. Five (20%)  
25  
26 providers at Level 4 facilities reported that their facility provides diagnostic and treatment  
27  
28 services without referral (e.g., ACE inhibitors, beta blockers, or aspirin). All 5 Level 5 facilities  
29  
30 reported giving oxygen to suspected AMI patients, while three reported providing aspirin, two  
31  
32 reported providing morphine and one reported providing epinephrine. Several of the Level 4  
33  
34 and 5 facilities were lacking in supplies and equipment to manage cardiac emergencies. Fifteen  
35  
36  
37  
38  
39  
40  
41 (50%) facilities had~~ve~~ morphine, six (20%) had~~ve~~ a functioning ECG machine, six (20%) had~~ve~~  
42  
43 nitroglycerin, and four (13%) had~~ve~~ a defibrillator.  
44  
45

46  
47  
48 Ten (33%) of 30 providers at Level 4 and 5 facilities reported that their facility is well-prepared  
49  
50  
51 to manage DKA. A majority of Level 4 and 5 facilities had~~ve~~ a glucometer (28/30, 93%) and  
52  
53  
54 insulin (24/30, 80%).  
55  
56  
57  
58  
59  
60

1  
2  
3 When asked about a standard procedure for cases of sepsis, the vast majority (29/30, 97%) of  
4  
5 Level 4 and 5 facilities reported providing some treatment for sepsis (e.g., antibiotics, IV fluids),  
6  
7  
8 but none had standardized clinical care guidelines. Twenty-three (92%) of the 25 Level 4 and all  
9  
10  
11 five of the Level 5 facilities had~~ve~~ vasopressor agents. Twenty-two (88%) of the 25 Level 4 and  
12  
13  
14 all five of the Level 5 facilities had~~ve~~ antibiotics.  
15  
16  
17

## 18 Discussion

20  
21 With an increasing number of NCDs, RTAs, and other time-sensitive illnesses and injuries, the  
22  
23 provision of emergency care in low-and middle-income countries is taking on increasing  
24  
25 importance. Our study illustrates that essential emergency and urgent care is severely lacking in  
26  
27 western Kenya. Limited communication, infrastructure, supplies, and properly trained human  
28  
29 resources all negatively impact the ability to deliver quality emergency and urgent health care.  
30  
31  
32

33  
34  
35  
36 Although by definition Level 2 and Level 3 facilities in Kenya are not designed nor expected to  
37  
38 provide comprehensive care for acutely ill patients, we elected to study their capabilities  
39  
40 around emergency care since community members often present to them with acute life-  
41  
42 threatening illnesses and injuries. We discovered that virtually all of the 30 Level 2 and 3  
43  
44 facilities we studied were unable to respond to the essential needs of patients presenting with  
45  
46 acute trauma, a possible heart attack, diabetic emergencies, or sepsis. Most facilities reported  
47  
48 transferring patients without even basic assessments or interventions. Few facilities had any  
49  
50 organized approach in transferring a patient or notifying the receiving facility.  
51  
52  
53  
54  
55  
56  
57  
58  
59  
60

1  
2  
3 The authors view the Level 2 and 3 facility findings as a compelling call to action for the  
4 development of a contextually appropriate, standardized basic level training and materials  
5 package for emergency care. For example, a training program in the essentials of emergency  
6 care for Level 2 and 3 facilities should include the development of a standard approach to all  
7 acute care patients: basic assessment and intervention of airway, breathing, and circulation;  
8 taking and interpreting vital signs; methodical total body assessment; hemorrhage control;  
9 immobilization and splinting of potential injuries; capabilities of providing basic high-impact  
10 diagnostics and interventions (e.g., point-of-care glucose, ECG, aspirin, antibiotics, splints); and  
11 a pre-established reliable and rapid referral and notification plan.  
12  
13  
14  
15  
16  
17  
18  
19  
20  
21  
22  
23  
24  
25  
26  
27

28 While emergent and urgent conditions present frequently to Level 4 and 5 facilities, we  
29 discovered that the hospitals' capabilities varied considerably. While all of the 30 facilities had  
30 gaps across each of the domains we studied, many of the gaps at the Level 4 facilities were  
31 quite profound. Overall, some of the more salient findings in the Level 4 and 5 facilities'  
32 assessments were: 70% do not have a standardized approach to trauma, few have the basic  
33 materials necessary to manage trauma (e.g. chest tube, blood), less than half have a functioning  
34 x-ray machine, less than half (43%) of the operating theatres have access to an anesthetist, only  
35 six of 30 have EKG machines or nitroglycerin, most do not give aspirin for heart attacks, few are  
36 able to provide care for DKA, and no facility had a standardized approach to sepsis.  
37  
38  
39  
40  
41  
42  
43  
44  
45  
46  
47  
48  
49  
50  
51  
52

53 The findings from our Level 4 and Level 5 facility assessment demonstrate an urgent need for a  
54 system-wide intervention, targeting the unmet higher-level facility needs of the acutely ill and  
55  
56  
57  
58  
59  
60

1  
2  
3 | injured. Many of the Level 4 and 5 facilities ~~did~~ not meet the most basic standard for the  
4  
5  
6 essentials of emergency care delivery that we believe can – and should – be universally  
7  
8 implemented at all lower-level facilities. We propose that in addition to every facility being  
9  
10 brought up to the basic level, a second package in essentials of advanced emergency care  
11  
12 should be developed and deployed to select Level 4 and 5 facilities. These selected facilities,  
13  
14 once meeting standards for training, materials, and infrastructure, should then be designated  
15  
16 and widely recognized and supported as *centers of excellence for advanced emergency care*,  
17  
18 and thereby capable of providing quality assessment and initial stabilization of all emergent and  
19  
20 urgent conditions.  
21  
22  
23  
24  
25  
26  
27

28  
29 Access to quality pre-hospital care services was universally poor in our study sample and can be  
30  
31 seen as an opportunity for organization and improvement. A basic pre-hospital system should  
32  
33 be created by establishing a mechanism to access reliable transportation staffed with personnel  
34  
35 who have basic life-support skills. Elsewhere, it has been shown that training lay people in the  
36  
37 community, such as community health workers or public transportation drivers to function as  
38  
39 pre-hospital care providers, can greatly improve the quality of emergency care.<sup>19</sup> Additionally, a  
40  
41 standardized communication method ought to be instituted. For example, in Sierra Leone, it  
42  
43 has been shown that equipping remote health facilities and traditional birth attendants with  
44  
45 radio receivers linked to referral hospitals can shorten response times and reduce maternal  
46  
47 deaths.<sup>20</sup>  
48  
49  
50  
51  
52  
53  
54  
55  
56  
57  
58  
59  
60



1  
2  
3 Although not addressed in this study, it is likely that these findings would be similar elsewhere  
4  
5 across sub-Saharan Africa. If this assessment is indeed generalizable, the authors believe that  
6  
7 the development of a set of standardized packages for basic and advanced essentials of  
8  
9 emergency care in low-resource settings, as well as designating *centers of excellence for*  
10  
11 *advanced emergency care*, should be a priority for the WHO and other stakeholders. The  
12  
13 African Federation for Emergency Medicine has been developing consensus recommendations  
14  
15 for emergency care packages for various facility levels.<sup>21</sup>  
16  
17  
18  
19  
20  
21  
22

23  
24 Our study had several limitations. Although we believe the lessons learned are representative  
25  
26 of counties in Kenya and other low-resource settings globally, our findings are not definitively  
27  
28 generalizable beyond the two counties surveyed. Furthermore, we recognize that elements of  
29  
30 our survey may have been limited by social desirability bias. Although we tried to mitigate this  
31  
32 with the confidential and voluntary nature of our survey and by explaining the purpose of our  
33  
34 study, participants may not have felt comfortable reporting problems or inadequacies in their  
35  
36 facilities. While our research staff included a local Kenyan who was present at all site visits and  
37  
38 functioned as a language and cultural ambassador, language and cultural differences may have  
39  
40 contributed to confounding variables. Furthermore, while informants were selected based on  
41  
42 their senior leadership roles and expertise with the operations of their facility, their responses  
43  
44 might not have always accurately reflected opinions of the majority of providers at the facility.  
45  
46  
47  
48  
49  
50  
51  
52

53  
54 In conclusion, with an increasing epidemic of NCDs and an increasing burden of injury and  
55  
56 trauma in low-resource areas, access to quality essential emergency and urgent care services is  
57  
58  
59  
60

1  
2  
3 critical for the health of surrounding communities. Our 60-facility assessment in western Kenya  
4  
5 identified significant widespread gaps in current emergency care capabilities, particularly in  
6  
7  
8 identifying and appropriately caring for victims of trauma, acute myocardial infarction, diabetic  
9  
10 emergencies, and sepsis. There is great opportunity for development of a universally deployed  
11  
12 basic package in the essentials of emergency care, a selectively implemented package in the  
13  
14 essentials of advanced emergency care, a center of excellence for emergency care facility  
15  
16 designation scheme, and a reliable pre-hospital care transportation and communications  
17  
18 system. Additionally, the profound gap in readily available trained anesthetists requires  
19  
20 immediate attention.  
21  
22  
23  
24  
25  
26  
27  
28  
29  
30  
31  
32  
33  
34  
35  
36  
37  
38  
39  
40  
41  
42  
43  
44  
45  
46  
47  
48  
49  
50  
51  
52  
53  
54  
55  
56  
57  
58  
59  
60

**Table 1: Description of levels of care in Kenya**

|         |                          |                                                                                                                                                                                                                                                                                                                                                                                                                                                                    |
|---------|--------------------------|--------------------------------------------------------------------------------------------------------------------------------------------------------------------------------------------------------------------------------------------------------------------------------------------------------------------------------------------------------------------------------------------------------------------------------------------------------------------|
| Level 1 | Community                | <ul style="list-style-type: none"> <li>- Care outside facility in households, communities, and villages</li> <li>- Maximum population served: 5,000</li> </ul>                                                                                                                                                                                                                                                                                                     |
| Level 2 | Dispensaries/<br>Clinics | <ul style="list-style-type: none"> <li>- Has limited staff (nurses, public health technicians, and assistants)</li> <li>- Responsible for community engagement through curative, promotive, preventive, and rehabilitative care at a basic level</li> <li>- Up to four beds for observation</li> <li>- Maximum population served: 10,000(rural) - 15,000(urban)</li> </ul>                                                                                         |
| Level 3 | Health<br>Centers        | <ul style="list-style-type: none"> <li>- Staffed by nurses, clinical officers, and occasionally doctors</li> <li>- Wider range of curative and preventive services than Level 2</li> <li>- Provide minor surgical services, like incision and drainage</li> <li>- Basic emergency preparedness</li> <li>- 12-49 beds</li> <li>- Maximum population served: 30,000-40,000</li> </ul>                                                                                |
| Level 4 | Primary<br>Hospitals     | <ul style="list-style-type: none"> <li>- Provide referral level outpatient care, curative and preventive care, surgical treatment techniques, and comprehensive emergency services</li> <li>- Provide clinical services in obstetrics and gynecology, child health, medicine, and surgery and anesthesia</li> <li>- Inpatient care and 24-hour service</li> <li>- Minimum 50 beds</li> <li>- Maximum population served: 100,000(rural) - 200,000(urban)</li> </ul> |

|           |                                     |                                                                                                                                                                                                                                                                                                                                                                                                                                                 |
|-----------|-------------------------------------|-------------------------------------------------------------------------------------------------------------------------------------------------------------------------------------------------------------------------------------------------------------------------------------------------------------------------------------------------------------------------------------------------------------------------------------------------|
| Level 5-6 | Secondary/<br>Tertiary<br>Hospitals | <ul style="list-style-type: none"><li>- Higher concentration of resources and personnel (medical professionals, nurses, and midwives)</li><li>- Provide clinical services in medicine, general surgery and anesthesia, pediatrics, and obstetrics/gynecology, dental, psychiatry, comprehensive accident and emergency, ENT, ophthalmology, dermatology, ICU</li><li>- Minimum 50 beds</li><li>- Maximum population served: 1,000,000</li></ul> |
|-----------|-------------------------------------|-------------------------------------------------------------------------------------------------------------------------------------------------------------------------------------------------------------------------------------------------------------------------------------------------------------------------------------------------------------------------------------------------------------------------------------------------|

**Table 2: Health facilities studied in Kisumu and Siaya counties in Kenya; November 2013-  
January 2014**

| Type of Health Facility            | Kisumu    | Siaya     | Total     |
|------------------------------------|-----------|-----------|-----------|
| Dispensary/Health Clinic (Level 2) | 9         | 12        | <b>21</b> |
| Health Center (Level 3)            | 6         | 3         | <b>9</b>  |
| Primary Hospitals (Level 4)        | 18        | 6         | <b>25</b> |
| Secondary Hospitals (Level 5)      | 4         | 1         | <b>5</b>  |
| <b>Total</b>                       | <b>38</b> | <b>22</b> | <b>60</b> |

**Table 3: Functioning supplies and equipment at health facilities in Kisumu and Siaya, Kenya**  
(number of facilities)

|                                | <b>Level 2</b><br>n=21 (%) | <b>Level 3</b><br>n=9 (%) | <b>Level 4</b><br>n=25 (%) | <b>Level 5</b><br>n=5 (%) | <b>Total</b><br>n=60 (%) |
|--------------------------------|----------------------------|---------------------------|----------------------------|---------------------------|--------------------------|
| <b>General</b>                 |                            |                           |                            |                           |                          |
| Gloves                         | 20 (95)                    | 7 (78)                    | 24 (96)                    | 5 (100)                   | 56 (93)                  |
| Face masks                     | 10 (48)                    | 4 (44)                    | 21 (84)                    | 5 (100)                   | 40 (67)                  |
| Gowns                          | 3 (14)                     | 4 (44)                    | 17 (68)                    | 5 (100)                   | 29 (48)                  |
| Monitored beds                 | NA                         | NA                        | 1 (4)                      | 4 (80)                    | 6 (10)                   |
| Central line kits              | NA                         | NA                        | 1 (4)                      | 4 (80)                    | 5 (8)                    |
| Suction                        | 5 (24)                     | 4 (44)                    | 19 (76)                    | 4 (80)                    | 32 (53)                  |
| Blood pressure cuffs           | 18 (86)                    | 6 (67)                    | 23 (92)                    | 5 (100)                   | 52 (87)                  |
| Splint/cast supplies           | 2 (10)                     | 1 (11)                    | 14 (56)                    | 4 (80)                    | 21 (35)                  |
| Suture and wound-care supplies | 18 (86)                    | 8 (89)                    | 23 (92)                    | 5 (100)                   | 54 (90)                  |
| Defibrillator                  | 1 (5)                      | 0 (0)                     | 1 (4)                      | 3 (60)                    | 5 (8)                    |
| Back-up power                  | 1 (5)                      | 2 (22)                    | 14 (56)                    | 5 (100)                   | 22 (42)                  |
| Chest tube trays               | 1 (5)                      | 1 (11)                    | 3 (12)                     | 5 (100)                   | 10 (17)                  |

|                                 |         |        |         |         |         |
|---------------------------------|---------|--------|---------|---------|---------|
| <b>Laboratory/Diagnostics</b>   |         |        |         |         |         |
| Ultrasound                      | 1 (5)   | 0 (0)  | 9 (36)  | 5 (100) | 15 (25) |
| ECG                             | 0 (0)   | 1 (11) | 3 (12)  | 3 (60)  | 8 (13)  |
| X-ray                           | 1 (5)   | 0 (0)  | 12 (48) | 5 (100) | 18 (30) |
| Otoscope                        | 5 (24)  | 4 (44) | 14 (56) | 5 (100) | 28 (47) |
| Ophthalmoscope                  | 4 (19)  | 4 (44) | 13 (52) | 5 (100) | 26 (43) |
| Glucometer                      | 3 (14)  | 3 (33) | 23 (92) | 5 (100) | 34 (57) |
| <b>Medications</b>              |         |        |         |         |         |
| Nitroglycerin                   | 0 (0)   | 1 (11) | 4 (16)  | 2 (40)  | 7 (12)  |
| Antibiotics                     | 16 (76) | 8 (89) | 22 (88) | 5 (100) | 51 (85) |
| Opiates                         | 0 (0)   | 0 (0)  | 10 (40) | 5 (100) | 15 (25) |
| Insulin                         | 4 (19)  | 1 (11) | 19 (76) | 5 (100) | 29 (48) |
| Pressors                        | NA      | NA     | 23 (92) | 5 (100) | 48 (80) |
| General and regional anesthesia | NA      | NA     | 8 (32)  | 5 (100) | 13 (22) |
| <b>Airway/Breathing</b>         |         |        |         |         |         |
| Oxygen                          | 5 (24)  | 2 (22) | 20 (80) | 5 (100) | 32 (53) |

|                      |        |        |         |         |         |
|----------------------|--------|--------|---------|---------|---------|
| CPAP/BPAP<br>machine | NA     | NA     | 0 (0)   | 1 (20)  | 1 (2)   |
| Ambubag              | 8 (38) | 1 (11) | 20 (80) | 5 (100) | 34 (57) |
| Intubation supplies  | 2 (10) | 4 (44) | 12 (48) | 5 (100) | 23 (38) |

For peer review only



## References

- 1 World Health Organization. Global status report on noncommunicable diseases 2010. Geneva: World Health Organization, 2010.
- 2 Peden M, McGee K, Sharma G. The injury chartbook: A graphical overview of the global burden of injuries. Geneva: World Health Organization, 2002.
- 3 Gosselin R, Spiegel D, Coughlin R, et al. Injuries: the neglected burden in developing countries. *Bulletin of the World Health Organization* 2009; **87**:246.
- 4 Mock C, Lormand JD, Goosen J, et al. Guidelines for essential trauma care. Geneva: World Health Organization, 2004.
- 5 Odhiambo FO, Beynon CM, Ogwang S, et al. Trauma-related mortality among adults in rural western Kenya: Characterising deaths using data from a health and demographic surveillance system. *PLoS ONE* 2013; **8**(11):e79840.
- 6 Ministry of Health, Government of Kenya. Guidelines for antiretroviral drug therapy in Kenya. 2011. Available at: [http://www.who.int/hiv/pub/guidelines/kenya\\_art.pdf](http://www.who.int/hiv/pub/guidelines/kenya_art.pdf). Accessed 7 May 2014.
- 7 Ministry of Public Health and Sanitation. Guidelines on management of leprosy and tuberculosis. 2009. Available at: [http://www.who.int/hiv/pub/guidelines/kenya\\_tb.pdf](http://www.who.int/hiv/pub/guidelines/kenya_tb.pdf). Accessed 7 May 2014.
- 8 Baker T, Lugazia E, Eriksen J, et al. Emergency and critical care services in Tanzania: A survey of ten hospitals. *BMC Health Services Research* 2013; **13**:140.
- 9 Wallis LA, Garach SR, Kropman A. State of emergency medicine in South Africa. *Int J Emerg Med* 2008; **1**(2):69–71.

- 1  
2  
3 10 Wen LS, Oshiomogho JI, Eluwa GI, et al. Characteristics and capabilities of emergency  
4 departments in Abuja, Nigeria. *Emerg Med J* 2012; **29**(10):798–801.  
5  
6  
7  
8 11 Wachira BW, Wallis LA, Geduld H. An analysis of the clinical practice of emergency  
9 medicine in public emergency departments in Kenya. *Emerg Med J* 2012; **29**(6):473–6.  
10  
11  
12 12 Mwaniki P, Ayieko P, Todd J, et al. Assessment of paediatric inpatient  
13 care during a multifaceted quality improvement intervention in Kenyan district  
14 hospitals: Use of prospectively collected case record data. *BMC Health Serv Res*  
15  
16  
17  
18  
19  
20  
21 2014; **14**:312.  
22  
23 13 Irimu GW, Gathara D, Zurovac D, et al. Performance of health workers in the  
24 management of seriously sick children at a Kenyan tertiary hospital: Before and after a training  
25  
26  
27  
28  
29  
30  
31 14 Commission on Revenue Allocation (2011) Kenya County Fact Sheets. Available at:  
32  
33  
34 [http://siteresources.worldbank.org/INTAFRICA/Resources/257994-1335471959878/  
35 Kenya\\_County\\_Fact\\_Sheets\\_Dec2011.pdf](http://siteresources.worldbank.org/INTAFRICA/Resources/257994-1335471959878/Kenya_County_Fact_Sheets_Dec2011.pdf). Accessed 7 May 2014.  
36  
37  
38 15 Commission on Revenue Allocation (2011) Kenya County Fact Sheets. Available at:  
39  
40  
41  
42 [http://siteresources.worldbank.org/INTAFRICA/Resources/257994-1335471959878/  
43 Kenya\\_County\\_Fact\\_Sheets\\_Dec2011.pdf](http://siteresources.worldbank.org/INTAFRICA/Resources/257994-1335471959878/Kenya_County_Fact_Sheets_Dec2011.pdf). Accessed 7 May 2014.  
44  
45  
46 16 Luoma M, Doherty J, Muchiri S, et al. August 2010. *Kenya Health System Assessment*  
47  
48  
49 2010. Bethesda, MD: Health Systems 20/20 project, Abt Associates Inc.  
50  
51 17 World Health Organization. Guidelines for essential trauma care. Geneva, World Health  
52  
53  
54  
55  
56  
57  
58  
59  
60  
Organization, 2004.

1  
2  
3 18 Razzak JA, Hyder AA, Akhtar T, et al. Assessing emergency medical care in low-income  
4 countries: A pilot study from Pakistan. *BMC Emergency Medicine* 2008; **8**:8.  
5  
6

7  
8 19 Mock CN, Tiska M, Adu-Ampofo M, et al. Improvements in prehospital trauma care in an  
9 African country with no formal emergency medical services. *J Trauma* 2002; **53**(1): 90–7.  
10  
11

12  
13 20 Samai O, Senegeh P. Facilitating emergency obstetrical care through transportation and  
14 communication, Bo, Sierra Leone. *International Journal of Gynecology and Obstetrics* 1997; 59  
15  
16  
17  
18  
19  
20  
21  
22  
23  
24  
25  
26  
27  
28  
29  
30  
31  
32  
33  
34  
35  
36  
37  
38  
39  
40  
41  
42  
43  
44  
45  
46  
47  
48  
49  
50  
51  
52  
53  
54  
55  
56  
57  
58  
59  
60  
Suppl **2**:S157–64.

21 Calvello E, Reynolds T, Hirshon JM, Buckle C, Moresky R, O'Neill J, Wallis LA. Emergency  
22 care in sub-Saharan Africa: Results of a consensus conference. *African Journal of Emergency*  
23  
24  
25  
26  
27  
28  
29  
30  
31  
32  
33  
34  
35  
36  
37  
38  
39  
40  
41  
42  
43  
44  
45  
46  
47  
48  
49  
50  
51  
52  
53  
54  
55  
56  
57  
58  
59  
60  
*Medicine* 2013; **3**(1): 42–8.
